# Supplementary material for: Effects of Posttrial Antihypertensive Drugs on Morbidity and Mortality: Findings from 15-Year Passive Follow-Up after ALLHAT Ended
Source: Hindawi journal article supplement (doi:10.1155/2021/2261144), 2021-12-09
Supplement: f1 [file 2261144.f1.pdf]

Supplemental Tables:

**Table S1. Systemic Antihypertensive Medication Classes and Common Generic and Brand Names**

| # | Antihypertensive medication classes<br>FDA Chronic Antihypertensive<br>Treatment Classes | Generic Name (GNN)                                                                                                                                                                                                                     | Brand Name (BN)                                                                                                                                                                                                                                                                                                     |
|---|------------------------------------------------------------------------------------------|----------------------------------------------------------------------------------------------------------------------------------------------------------------------------------------------------------------------------------------|---------------------------------------------------------------------------------------------------------------------------------------------------------------------------------------------------------------------------------------------------------------------------------------------------------------------|
| 1 | Aldosterone antagonists †                                                                | Eplerenone<br>Spironolactone                                                                                                                                                                                                           | Inspra<br>Aldactone, Carospir, Aldactazide‡                                                                                                                                                                                                                                                                         |
| 2 | Alpha 1 adrenergic receptor agonist<br>(selective; <b>α-blocker</b> )                    | <b>Doxazosin [Step 1 in ALLHAT]</b><br>Prazosin<br>Terazosin                                                                                                                                                                           | Cardura (XL)<br>Minipress, Prazin, Prazo<br>Hytrin                                                                                                                                                                                                                                                                  |
| 3 | Angiotensin-converting enzyme ( <b>ACE</b> )<br>inhibitor                                | Benazepril<br>Captopril<br>Enalapril<br>Fosinopril<br><b>Lisinopril [Step I]</b><br>Moexipril<br>Perindopril<br>Quinapril<br>Ramipril<br>Trandolapril                                                                                  | Lotensin, Lotensin HCT‡, Lotrel‡<br>Capoten, Captoril, Capozide‡<br>Vasotec, Enalaprilat, Epaned, Lexxel†§, Vaseretic‡<br>Monopril<br>Prinivil, Qbrelis, Zestril, Zestoretic‡<br>Univasc, Uniretic‡<br>Aceon, Prestalia‡<br>Accupril, Accuretic‡<br>Altace<br>Mavik, Tarka‡                                         |
| 4 | Angiotensin II receptor blockers ( <b>ARB</b> )                                          | Azilsartan<br>Candesartan<br>Eprosartan<br>Irbesartan<br>Losartan<br>Olmesartan<br>Telmisartan<br>Valsartan                                                                                                                            | Edarbi, Edarbychlor‡<br>Atacand, Atacand HCT‡<br>Teveten, Teveten HCT‡, Teveten Plus‡<br>Avapro, Avalide‡<br>Cozaar, Hyzaar‡<br>Benicar, Azor‡, Benicar HCT‡, Tribenzor‡<br>Micardis, Micardis HCT‡, Micardis Plus‡, Twynsta‡<br>Diovan, Prexxartan§, Byvalson‡, Diovan HCT‡, Exforge HCT‡,<br>Entresto‡, Valturna‡ |
| 5 | Arteriolar vasodilators                                                                  | <b>Hydralazine [Step 3 in ALLHAT]</b><br>Minoxidil                                                                                                                                                                                     | -, Hydra-zide‡, <i>BiDil</i><br>Loniten, Minodyl, Minoxidil HTN                                                                                                                                                                                                                                                     |
| 6 | Autonomic ganglionic vasodilators                                                        | Mecamylamine                                                                                                                                                                                                                           | -                                                                                                                                                                                                                                                                                                                   |
| 7 | Beta adrenergic blockers ( <b>β-blockers</b> )                                           | Acebutolol<br><b>Atenolol [Step 2 in ALLHAT]</b><br>Betaxolol<br>Bisoprolol<br>Carvedilol {also with α1 properties}<br>Labetalol {also with α1 properties}<br>Metoprolol<br><br>Nadolol<br>Nebivolol<br><i>Pindolol</i><br>Propranolol | Sectral<br>Tenormin, Tenoretic‡<br>Kerlone<br>Monacor, Zebeta, Ziac‡<br>Coreg, Coreg CR<br>Trandate<br>Kaspargo Sprinkle, Lopressor, Toprol XL, Dutoprol‡, Lopressor<br>HCT‡<br>Corgard, Corzide‡<br>Bystolic, Byvalson‡<br><i>Visken</i><br>Inderal, Inderal LA, InnoPran XL, Inderide‡                            |

|    |                                                      |                                                                                                                |                                                                                                                                                                                                                                                                                                                                                                                                                                                                                                                                                                                                                                                                                                                                                                                                           |
|----|------------------------------------------------------|----------------------------------------------------------------------------------------------------------------|-----------------------------------------------------------------------------------------------------------------------------------------------------------------------------------------------------------------------------------------------------------------------------------------------------------------------------------------------------------------------------------------------------------------------------------------------------------------------------------------------------------------------------------------------------------------------------------------------------------------------------------------------------------------------------------------------------------------------------------------------------------------------------------------------------------|
| 8  | Calcium channel blocker (CCB)-dihydropyridine        | <b>Amlodipine [Step 1]</b><br><br>Felodipine<br><br>Isradipine<br>Nicardipine<br>Nifedipine<br><br>Nisoldipine | Norvasc, Amturnide <sup>‡</sup> , Azor <sup>‡</sup> , Exforge HCT <sup>‡</sup> , Lotrel <sup>‡</sup> , Prestalia <sup>‡</sup> , Tekamlo <sup>‡</sup> , Tribenzor <sup>‡</sup> , Twynsta <sup>‡</sup><br>Cabren, Cardioplen XL, Felendil XL, Felogen XL, Felotens XL, Keloc SR, Neofel XL, Plendil, Renedil, Vascalpha, Lexxel <sup>‡§</sup><br>-<br>Cardene, Cardene SR<br>Adalat, Adalat CC, Afeditab CR, Nifediac CC, Nifedical XL, Procardia, Procardia XL<br>Sular                                                                                                                                                                                                                                                                                                                                    |
| 9  | Calcium channel blocker – non-dihydropyridine        | Diltiazem<br><br>Verapamil                                                                                     | Cardizem, Cardizem CD, Cardizem LA, <i>Cartia XT</i> , Dilacor, Dilacor XR, Dilatrate, Diltazem, Diltazem CD, <i>Diltia XT</i> , Diltiaz, Diltiaz CD, Diltiaz SR, <i>Diltzac</i> , <i>Taztia</i> , Tiazac<br>Calan, Calan HS, Calan SR, Covera HS, Isoptin, Isoptin SR, Verelan, Verelan PM, Tarka <sup>‡</sup>                                                                                                                                                                                                                                                                                                                                                                                                                                                                                           |
| 10 | Central alpha 2 adrenergic agonists                  | <b>Clonidine [Step 2]</b><br>Guanfacine<br>Methyldopa                                                          | Catapres, Jenloga, Kapvay, Nexiclon XR, Clorpres <sup>‡</sup><br>Intuniv, Tenex                                                                                                                                                                                                                                                                                                                                                                                                                                                                                                                                                                                                                                                                                                                           |
| 11 | Diuretics: thiazide                                  | Bendroflumethiazide<br>Chlorothiazide<br>Hydrochlorothiazide                                                   | Naturetin <sup>§</sup> , NeoNaClex <sup>§</sup> , Urizide <sup>§</sup> , Corzide <sup>‡</sup><br>Diuril, Tekturna HCT <sup>‡</sup><br>Microzide, Accuretic <sup>‡</sup> , Aldactazide <sup>‡</sup> , Atacand HCT <sup>‡</sup> , Avalide <sup>‡</sup> , Benicar HCT <sup>‡</sup> , Capozide <sup>‡</sup> , Corzide <sup>‡</sup> , Dutoprol <sup>‡</sup> , Exforge HCT <sup>‡</sup> , Hydra-zide <sup>‡</sup> , Hyzaar <sup>‡</sup> , Inderide <sup>‡</sup> , Lopressor HCT <sup>‡</sup> , Lotensin HCT <sup>‡</sup> , Maxide <sup>‡</sup> , Micardis HCT <sup>‡</sup> , Micardis Plus <sup>‡</sup> , Moduretic <sup>‡</sup> , Teveten HCT <sup>‡</sup> , Teveten Plus <sup>‡</sup> , Tribenzor <sup>‡</sup> , Uniretic <sup>‡</sup> , Vaseretic <sup>‡</sup> , Zestoretic <sup>‡</sup> , Ziac <sup>‡</sup> |
|    | Diuretics: thiazide-type                             | <b>Chlorthalidone [Step 1]</b><br><br>Indapamide<br>Metolazone                                                 | Hygroton, Thalitone, Chlorthalid, Clorpres <sup>‡</sup> , Edarbychlor <sup>‡</sup> , Tenoretic <sup>‡</sup><br>-<br>Zaroxolyn                                                                                                                                                                                                                                                                                                                                                                                                                                                                                                                                                                                                                                                                             |
|    | Diuretics: loop                                      | Bumetanide<br>Furosemide<br>Torsemide                                                                          | Bumex, Burinex<br>Lasix<br>Demadex                                                                                                                                                                                                                                                                                                                                                                                                                                                                                                                                                                                                                                                                                                                                                                        |
|    | Diuretics: potassium-sparing <sup>†</sup>            | Amiloride<br>Triamterene                                                                                       | Midamor, Moduretic <sup>‡</sup><br>Dyrenium, <i>Dyazide</i> , Maxide <sup>‡</sup>                                                                                                                                                                                                                                                                                                                                                                                                                                                                                                                                                                                                                                                                                                                         |
| 12 | Peripheral adrenergic neuron antagonist <sup>†</sup> | <b>Reserpine [Step 2]</b>                                                                                      | Serpasil                                                                                                                                                                                                                                                                                                                                                                                                                                                                                                                                                                                                                                                                                                                                                                                                  |
| 13 | Renin inhibitors                                     | Aliskiren                                                                                                      | Tekturna, Tekturna HCT <sup>‡</sup> , Teklamo <sup>‡</sup> , Amturnide <sup>‡</sup> , Valturna <sup>‡</sup>                                                                                                                                                                                                                                                                                                                                                                                                                                                                                                                                                                                                                                                                                               |

<sup>†</sup>Not used alone/used in combination for chronic hypertension treatment

<sup>‡</sup>Combination medication also listed in another class

<sup>§</sup>Currently discontinued in the US but in use during ALLHAT

**Table S2a. ICD-9 and ICD-10 Codes for Heart Failures**

| <b>ICD-10 Codes</b> | <b>Description</b>                                                                                                                                         | <b>ICD-9 Codes</b> | <b>Description</b>                                                                    |
|---------------------|------------------------------------------------------------------------------------------------------------------------------------------------------------|--------------------|---------------------------------------------------------------------------------------|
| I09.81              | Rheumatic heart failure                                                                                                                                    | 398.91             | Rheumatic heart failure (congestive)                                                  |
| I09.89              | Other specified rheumatic heart diseases                                                                                                                   | 398.99             | Other rheumatic heart diseases                                                        |
| I11.0               | Hypertensive heart disease with heart failure                                                                                                              | 402.01             | Malignant hypertensive heart disease with heart failure                               |
| I11.0               | Hypertensive heart disease with heart failure                                                                                                              | 402.11             | Benign hypertensive heart disease with heart failure                                  |
| I11.0               | Hypertensive heart disease with heart failure                                                                                                              | 402.91             | Unspecified hypertensive heart disease with heart failure                             |
| I13.0               | Hypertensive heart and chronic kidney disease with heart failure and stage 1 through stage 4 chronic kidney disease, or unspecified chronic kidney disease | 404.01             | Malignant hypertensive heart and renal disease with heart failure                     |
| I13.2               | Hypertensive heart and chronic kidney disease with heart failure and with stage 5 chronic kidney disease, or end stage renal disease                       | 404.03             | Malignant hypertensive heart and renal disease with heart failure and renal failure   |
| I13.0               | Hypertensive heart and chronic kidney disease with heart failure and stage 1 through stage 4 chronic kidney disease, or unspecified chronic kidney disease | 404.11             | Benign hypertensive heart and renal disease with heart failure                        |
| I13.2               | Hypertensive heart and chronic kidney disease with heart failure and with stage 5 chronic kidney disease, or end stage renal disease                       | 404.13             | Benign hypertensive heart and renal disease with heart failure and renal failure      |
| I13.0               | Hypertensive heart and chronic kidney disease with heart failure and stage 1 through stage 4 chronic kidney disease, or unspecified chronic kidney disease | 404.91             | Unspecified hypertensive heart and renal disease with heart failure                   |
| I13.2               | Hypertensive heart and chronic kidney disease with heart failure and with stage 5 chronic kidney disease, or end stage renal disease                       | 404.93             | Unspecified hypertensive heart and renal disease with heart failure and renal failure |
| I26.09              | Other pulmonary embolism with acute cor pulmonale                                                                                                          | 415                | Acute pulmonary heart disease                                                         |
| I40.9               | Acute myocarditis, unspecified                                                                                                                             | 422.90             | Acute myocarditis, unspecified                                                        |
| I42.5               | Other restrictive cardiomyopathy                                                                                                                           | 425.4              | Other primary cardiomyopathies                                                        |
| I42.7               | Cardiomyopathy due to drug and external agent                                                                                                              | 425.9              | Secondary cardiomyopathy, unspecified                                                 |
| I50                 | Heart failure                                                                                                                                              | 428                | Heart failure                                                                         |

**Table S2b. ICD-9 and ICD-10 Codes for Ischemic heart disease, or coronary heart disease (CHD) or coronary artery disease**

| <b>ICD-10 Codes</b> | <b>Description</b>                                       | <b>ICD9 Codes</b> | <b>Description</b>                                       |
|---------------------|----------------------------------------------------------|-------------------|----------------------------------------------------------|
| I21.x               | Acute myocardial infarction                              | 410.x             | Acute myocardial infarction                              |
| I24.x               | Other acute and subacute forms of ischemic heart disease | 411.x             | Other acute and subacute forms of ischemic heart disease |
| I25.2               | Old myocardial infarction                                | 412.x             | Old myocardial infarction                                |
| I20.x               | Angina pectoris                                          | 413.x             | Angina pectoris                                          |
| I25.x               | Other forms of chronic ischemic heart disease            | 414.x             | Other forms of chronic ischemic heart disease            |

**Table S2c. ICD-9 and ICD-10 Codes for Cerebrovascular Disease or Stroke**

| <b>ICD-10 Codes</b> | <b>Description</b>                                                | <b>ICD-9 Codes</b> | <b>Description</b>                              |
|---------------------|-------------------------------------------------------------------|--------------------|-------------------------------------------------|
| I60.x               | Nontraumatic subarachnoid hemorrhage, unspecified                 | 430.x              | Subarachnoid hemorrhage                         |
| I61.x               | Nontraumatic intracerebral hemorrhage, unspecified                | 431.x              | Intracerebral hemorrhage                        |
| I62.x               | Nontraumatic extradural hemorrhage                                | 432.x              | Other and unspecified intracranial hemorrhage   |
| I65.x               | Occlusion and stenosis of 'various' artery                        | 433.x              | Occlusion and stenosis of precerebral arteries  |
| I66.x               | Occlusion and stenosis of 'various' cerebral artery               | 434.x              | Occlusion of cerebral arteries                  |
| G45.x               | Other transient cerebral ischemic attacks and related syndromes   | 435.x              | Transient cerebral ischemia                     |
| I67.89              | Other cerebrovascular disease                                     | 436.x              | Acute, but ill-defined, cerebrovascular disease |
| I67.x               | Cerebral atherosclerosis, or Cerebrovascular disease, unspecified | 437.x              | Other and ill-defined cerebrovascular disease   |
| I69.x               | Unspecified sequelae of unspecified cerebrovascular disease       | 438.x              | Late effects of cerebrovascular disease         |

**Table S2d. ICD-9 and ICD-10 Codes for Cancer**

| <b>ICD-10 Codes</b> | <b>Description</b>                                                    | <b>ICD-9 Codes</b> | <b>Description</b>       |
|---------------------|-----------------------------------------------------------------------|--------------------|--------------------------|
| C00                 | Malignant neoplasm of lip                                             | 140                | MALIGNANT NEOPLASM LIP   |
| C000                | MALIGNANT NEOPLASM OF EXTERNAL UPPER LIP                              | 1400               | MAL NEO UPPER VERMILION  |
| C001                | MALIGNANT NEOPLASM OF EXTERNAL LOWER LIP                              | 1401               | MAL NEO LOWER VERMILION  |
| C003                | MALIGNANT NEOPLASM OF UPPER LIP, INNER ASPECT                         | 1403               | MAL NEO UPPER LIP, INNER |
| C004                | MALIGNANT NEOPLASM OF LOWER LIP, INNER ASPECT                         | 1404               | MAL NEO LOWER LIP, INNER |
| C005                | MALIGNANT NEOPLASM OF LIP, UNSPECIFIED, INNER ASPECT                  | 1405               | MAL NEO LIP, INNER NOS   |
| C006                | MALIGNANT NEOPLASM OF COMMISSURE OF LIP, UNSPECIFIED                  | 1406               | MAL NEO LIP, COMMISSURE  |
| C008                | MALIGNANT NEOPLASM OF OVERLAPPING SITES OF LIP                        | 1408               | MAL NEO LIP NEC          |
| C002                | MALIGNANT NEOPLASM OF EXTERNAL LIP, UNSPECIFIED                       | 1409               | MAL NEO LIP/VERMIL NOS   |
| C029                | MALIGNANT NEOPLASM OF TONGUE, UNSPECIFIED                             | 141                | MALIG NEO TONGUE         |
| C01                 | MALIGNANT NEOPLASM OF BASE OF TONGUE                                  | 1410               | MAL NEO TONGUE BASE      |
| C020                | MALIGNANT NEOPLASM OF DORSAL SURFACE OF TONGUE                        | 1411               | MAL NEO DORSAL TONGUE    |
| C021                | MALIGNANT NEOPLASM OF BORDER OF TONGUE                                | 1412               | MAL NEO TIP/LAT TONGUE   |
| C022                | MALIGNANT NEOPLASM OF VENTRAL SURFACE OF TONGUE                       | 1413               | MAL NEO VENTRAL TONGUE   |
| C023                | MALIGNANT NEOPLASM OF ANTERIOR TWO-THIRDS OF TONGUE, PART UNSPECIFIED | 1414               | MAL NEO ANT 2/3 TONGUE   |
| C028                | MALIGNANT NEOPLASM OF OVERLAPPING SITES OF TONGUE                     | 1415               | MAL NEO TONGUE JUNCTION  |
| C024                | MALIGNANT NEOPLASM OF LINGUAL TONSIL                                  | 1416               | MAL NEO LINGUAL TONSIL   |
| C028                | MALIGNANT NEOPLASM OF OVERLAPPING SITES OF TONGUE                     | 1418               | MALIG NEO TONGUE NEC     |
| C029                | MALIGNANT NEOPLASM OF TONGUE, UNSPECIFIED                             | 1419               | MALIG NEO TONGUE NOS     |
| C089                | MALIGNANT NEOPLASM OF MAJOR SALIVARY GLAND, UNSPECIFIED               | 142                | MAL NEO MAJOR SALIVARY   |
| C07                 | MALIGNANT NEOPLASM OF PAROTID GLAND                                   | 1420               | MALIG NEO PAROTID        |
| C080                | MALIGNANT NEOPLASM OF SUBMANDIBULAR GLAND                             | 1421               | MALIG NEO SUBMANDIBULAR  |
| C081                | MALIGNANT NEOPLASM OF SUBLINGUAL GLAND                                | 1422               | MALIG NEO SUBLINGUAL     |
| C088                | MALIGNANT NEOPLASM OF MAJOR SALIVARY GLAND, UNSPECIFIED               | 1428               | MAL NEO MAJ SALIVARY NEC |
| C089                | MALIGNANT NEOPLASM OF MAJOR SALIVARY GLAND, UNSPECIFIED               | 1429               | MAL NEO SALIVARY NOS     |
| C03                 | Malignant neoplasm of gum                                             | 143                | MALIGNANT NEOPLASM GUM   |
| C030                | MALIGNANT NEOPLASM OF UPPER GUM                                       | 1430               | MALIG NEO UPPER GUM      |
| C031                | MALIGNANT NEOPLASM OF LOWER GUM                                       | 1431               | MALIG NEO LOWER GUM      |
| C039                | MALIGNANT NEOPLASM OF GUM, UNSPECIFIED                                | 1438               | MALIG NEO GUM NEC        |
| C039                | MALIGNANT NEOPLASM OF GUM, UNSPECIFIED                                | 1439               | MALIG NEO GUM NOS        |
| C04                 | Malignant neoplasm of floor of mouth                                  | 144                | MALIG NEO MOUTH FLOOR    |
| C040                | MALIGNANT NEOPLASM OF ANTERIOR FLOOR OF MOUTH                         | 1440               | MAL NEO ANT FLOOR MOUTH  |
| C041                | MALIGNANT NEOPLASM OF LATERAL FLOOR OF MOUTH                          | 1441               | MAL NEO LAT FLOOR MOUTH  |
| C048                | MALIGNANT NEOPLASM OF OVERLAPPING SITES OF FLOOR OF MOUTH             | 1448               | MAL NEO MOUTH FLOOR NEC  |
| C049                | MALIGNANT NEOPLASM OF FLOOR OF MOUTH, UNSPECIFIED                     | 1449               | MAL NEO MOUTH FLOOR NOS  |
| C06                 | Malignant neoplasm of other and unspecified parts of mouth            | 145                | MALIG NEO MOUTH NEC/NOS  |
| C060                | MALIGNANT NEOPLASM OF CHEEK MUCOSA                                    | 1450               | MAL NEO CHEEK MUCOSA     |
| C061                | MALIGNANT NEOPLASM OF VESTIBULE OF MOUTH                              | 1451               | MAL NEO MOUTH VESTIBULE  |

|       |                                                                                        |      |                          |
|-------|----------------------------------------------------------------------------------------|------|--------------------------|
| C050  | MALIGNANT NEOPLASM OF HARD PALATE                                                      | 1452 | MALIG NEO HARD PALATE    |
| C051  | MALIGNANT NEOPLASM OF SOFT PALATE                                                      | 1453 | MALIG NEO SOFT PALATE    |
| C052  | MALIGNANT NEOPLASM OF UVULA                                                            | 1454 | MALIGNANT NEOPLASM UVULA |
| C059  | MALIGNANT NEOPLASM OF PALATE, UNSPECIFIED                                              | 1455 | MALIGNANT NEO PALATE NOS |
| C062  | MALIGNANT NEOPLASM OF RETROMOLAR AREA                                                  | 1456 | MALIG NEO RETROMOLAR     |
| C0689 | MALIGNANT NEOPLASM OF OVERLAPPING SITES OF OTHER PARTS OF MOUTH                        | 1458 | MALIG NEOPLASM MOUTH NEC |
| C069  | MALIGNANT NEOPLASM OF MOUTH, UNSPECIFIED                                               | 1459 | MALIG NEOPLASM MOUTH NOS |
| C10   | Malignant neoplasm of oropharynx                                                       | 146  | MALIG NEO OROPHARYNX     |
| C099  | MALIGNANT NEOPLASM OF TONSIL, UNSPECIFIED                                              | 1460 | MALIGNANT NEOPL TONSIL   |
| C090  | MALIGNANT NEOPLASM OF TONSILLAR FOSSA                                                  | 1461 | MAL NEO TONSILLAR FOSSA  |
| C091  | MALIGNANT NEOPLASM OF TONSILLAR PILLAR (ANTERIOR) (POSTERIOR)                          | 1462 | MAL NEO TONSIL PILLARS   |
| C100  | MALIGNANT NEOPLASM OF VALLECULA                                                        | 1463 | MALIGN NEOPL VALLECULA   |
| C101  | MALIGNANT NEOPLASM OF ANTERIOR SURFACE OF EPIGLOTTIS                                   | 1464 | MAL NEO ANT EPIGLOTTIS   |
| C108  | MALIGNANT NEOPLASM OF OVERLAPPING SITES OF OROPHARYNX                                  | 1465 | MAL NEO EPIGLOTTIS JUNCT |
| C102  | MALIGNANT NEOPLASM OF LATERAL WALL OF OROPHARYNX                                       | 1466 | MAL NEO LAT OROPHARYNX   |
| C103  | MALIGNANT NEOPLASM OF POSTERIOR WALL OF OROPHARYNX                                     | 1467 | MAL NEO POST OROPHARYNX  |
| C109  | MALIGNANT NEOPLASM OF OROPHARYNX, UNSPECIFIED                                          | 1468 | MAL NEO OROPHARYNX NEC   |
| C109  | MALIGNANT NEOPLASM OF OROPHARYNX, UNSPECIFIED                                          | 1469 | MALIG NEO OROPHARYNX NOS |
| C11   | Malignant neoplasm of nasopharynx                                                      | 147  | MALIG NEO NASOPHARYNX    |
| C110  | MALIGNANT NEOPLASM OF SUPERIOR WALL OF NASOPHARYNX                                     | 1470 | MAL NEO SUPER NASOPHARYN |
| C111  | MALIGNANT NEOPLASM OF POSTERIOR WALL OF NASOPHARYNX                                    | 1471 | MAL NEO POST NASOPHARYNX |
| C112  | MALIGNANT NEOPLASM OF LATERAL WALL OF NASOPHARYNX                                      | 1472 | MAL NEO LAT NASOPHARYNX  |
| C113  | MALIGNANT NEOPLASM OF ANTERIOR WALL OF NASOPHARYNX                                     | 1473 | MAL NEO ANT NASOPHARYNX  |
| C118  | MALIGNANT NEOPLASM OF OVERLAPPING SITES OF NASOPHARYNX                                 | 1478 | MAL NEO NASOPHARYNX NEC  |
| C119  | MALIGNANT NEOPLASM OF NASOPHARYNX, UNSPECIFIED                                         | 1479 | MAL NEO NASOPHARYNX NOS  |
| C13   | Malignant neoplasm of hypopharynx                                                      | 148  | MALIG NEOPL HYPOPHARYNX  |
| C130  | MALIGNANT NEOPLASM OF POSTCRICOID REGION                                               | 1480 | MAL NEO POSTCRICOID      |
| C12   | MALIGNANT NEOPLASM OF PYRIFORM SINUS                                                   | 1481 | MAL NEO PYRIFORM SINUS   |
| C131  | MALIGNANT NEOPLASM OF ARYEPIGLOTTIC FOLD, HYPOPHARYNGEAL ASPECT                        | 1482 | MAL NEO ARYEPIGLOTT FOLD |
| C132  | MALIGNANT NEOPLASM OF POSTERIOR WALL OF HYPOPHARYNX                                    | 1483 | MAL NEO POST HYPOPHARYNX |
| C138  | MALIGNANT NEOPLASM OF OVERLAPPING SITES OF HYPOPHARYNX                                 | 1488 | MAL NEO HYPOPHARYNX NEC  |
| C139  | MALIGNANT NEOPLASM OF HYPOPHARYNX, UNSPECIFIED                                         | 1489 | MAL NEO HYPOPHARYNX NOS  |
| C14   | Malignant neoplasm of other and ill-defined sites in the lip, oral cavity, and pharynx | 149  | OTH MALIG NEO OROPHARYNX |
| C140  | MALIGNANT NEOPLASM OF PHARYNX, UNSPECIFIED                                             | 1490 | MAL NEO PHARYNX NOS      |
| C142  | MALIGNANT NEOPLASM OF WALDEYER'S RING                                                  | 1491 | MAL NEO WALDEYER'S RING  |
| C148  | MALIGNANT NEOPLASM OF OVERLAPPING SITES OF LIP, ORAL CAVITY AND PHARYNX                | 1498 | MAL NEO ORAL/PHARYNX NEC |
| C148  | MALIGNANT NEOPLASM OF OVERLAPPING SITES OF LIP, ORAL CAVITY AND PHARYNX                | 1499 | MAL NEO OROPHRYN ILL-DEF |
| C15   | Malignant neoplasm of esophagus                                                        | 150  | MALIGNANT NEO ESOPHAGUS  |
| C150  | MALIGNANT NEOPLASM OF UPPER THIRD OF ESOPHAGUS                                         | 1500 | MAL NEO CERVICAL ESOPHAG |
| C151  | MALIGNANT NEOPLASM OF MIDDLE THIRD OF ESOPHAGUS                                        | 1501 | MAL NEO THORACIC ESOPHAG |
| C152  | MALIGNANT NEOPLASM OF LOWER THIRD OF ESOPHAGUS                                         | 1502 | MAL NEO ABDOMIN ESOPHAG  |
| C153  | MALIGNANT NEOPLASM OF UPPER THIRD OF ESOPHAGUS                                         | 1503 | MAL NEO UPPER 3RD ESOPH  |
| C154  | MALIGNANT NEOPLASM OF MIDDLE THIRD OF ESOPHAGUS                                        | 1504 | MAL NEO MIDDLE 3RD ESOPH |
| C155  | MALIGNANT NEOPLASM OF LOWER THIRD OF ESOPHAGUS                                         | 1505 | MAL NEO LOWER 3RD ESOPH  |

|      |                                                                        |      |                          |
|------|------------------------------------------------------------------------|------|--------------------------|
| C158 | MALIGNANT NEOPLASM OF OVERLAPPING SITES OF ESOPHAGUS                   | 1508 | MAL NEO ESOPHAGUS NEC    |
| C159 | MALIGNANT NEOPLASM OF ESOPHAGUS, UNSPECIFIED                           | 1509 | MAL NEO ESOPHAGUS NOS    |
| C16  | Malignant neoplasm of stomach                                          | 151  | MALIGNANT NEO STOMACH    |
| C160 | MALIGNANT NEOPLASM OF CARDIA                                           | 1510 | MAL NEO STOMACH CARDIA   |
| C164 | MALIGNANT NEOPLASM OF PYLORUS                                          | 1511 | MALIGNANT NEO PYLORUS    |
| C163 | MALIGNANT NEOPLASM OF PYLORIC ANTRUM                                   | 1512 | MAL NEO PYLORIC ANTRUM   |
| C161 | MALIGNANT NEOPLASM OF FUNDUS OF STOMACH                                | 1513 | MAL NEO STOMACH FUNDUS   |
| C162 | MALIGNANT NEOPLASM OF BODY OF STOMACH                                  | 1514 | MAL NEO STOMACH BODY     |
| C165 | MALIGNANT NEOPLASM OF LESSER CURVATURE OF STOMACH, UNSPECIFIED         | 1515 | MAL NEO STOM LESSER CURV |
| C166 | MALIGNANT NEOPLASM OF GREATER CURVATURE OF STOMACH, UNSPECIFIED        | 1516 | MAL NEO STOM GREAT CURV  |
| C168 | MALIGNANT NEOPLASM OF OVERLAPPING SITES OF STOMACH                     | 1518 | MALIG NEOPL STOMACH NEC  |
| C169 | MALIGNANT NEOPLASM OF STOMACH, UNSPECIFIED                             | 1519 | MALIG NEOPL STOMACH NOS  |
| C17  | Malignant neoplasm of small intestine                                  | 152  | MALIG NEO SMALL BOWEL    |
| C170 | MALIGNANT NEOPLASM OF DUODENUM                                         | 1520 | MALIGNANT NEOPL DUODENUM |
| C171 | MALIGNANT NEOPLASM OF JEJUNUM                                          | 1521 | MALIGNANT NEOPL JEJUNUM  |
| C172 | MALIGNANT NEOPLASM OF ILEUM                                            | 1522 | MALIGNANT NEOPLASM ILEUM |
| C173 | MECKEL'S DIVERTICULUM, MALIGNANT                                       | 1523 | MAL NEO MECKEL'S DIVERT  |
| C178 | MALIGNANT NEOPLASM OF OVERLAPPING SITES OF SMALL INTESTINE             | 1528 | MAL NEO SMALL BOWEL NEC  |
| C179 | MALIGNANT NEOPLASM OF SMALL INTESTINE, UNSPECIFIED                     | 1529 | MAL NEO SMALL BOWEL NOS  |
| C18  | Malignant neoplasm of colon                                            | 153  | MALIGNANT NEOPLASM COLON |
| C183 | MALIGNANT NEOPLASM OF HEPATIC FLEXURE                                  | 1530 | MAL NEO HEPATIC FLEXURE  |
| C184 | MALIGNANT NEOPLASM OF TRANSVERSE COLON                                 | 1531 | MAL NEO TRANSVERSE COLON |
| C186 | MALIGNANT NEOPLASM OF DESCENDING COLON                                 | 1532 | MAL NEO DESCEND COLON    |
| C187 | MALIGNANT NEOPLASM OF SIGMOID COLON                                    | 1533 | MAL NEO SIGMOID COLON    |
| C180 | MALIGNANT NEOPLASM OF CECUM                                            | 1534 | MALIGNANT NEOPLASM CECUM |
| C181 | MALIGNANT NEOPLASM OF APPENDIX                                         | 1535 | MALIGNANT NEO APPENDIX   |
| C182 | MALIGNANT NEOPLASM OF ASCENDING COLON                                  | 1536 | MALIG NEO ASCEND COLON   |
| C185 | MALIGNANT NEOPLASM OF SPLENIC FLEXURE                                  | 1537 | MAL NEO SPLENIC FLEXURE  |
| C188 | MALIGNANT NEOPLASM OF OVERLAPPING SITES OF COLON                       | 1538 | MALIGNANT NEO COLON NEC  |
| C189 | MALIGNANT NEOPLASM OF COLON, UNSPECIFIED                               | 1539 | MALIGNANT NEO COLON NOS  |
| C218 | MALIGNANT NEOPLASM OF OVERLAPPING SITES OF RECTUM, ANUS AND ANAL CANAL | 154  | MALIG NEO RECTUM/ANUS    |
| C19  | MALIGNANT NEOPLASM OF RECTOSIGMOID JUNCTION                            | 1540 | MAL NEO RECTOSIGMOID JCT |
| C20  | MALIGNANT NEOPLASM OF RECTUM                                           | 1541 | MALIGNANT NEOPL RECTUM   |
| C211 | MALIGNANT NEOPLASM OF ANAL CANAL                                       | 1542 | MALIG NEOPL ANAL CANAL   |
| C210 | MALIGNANT NEOPLASM OF ANUS, UNSPECIFIED                                | 1543 | MALIGNANT NEO ANUS NOS   |
| C218 | MALIGNANT NEOPLASM OF OVERLAPPING SITES OF RECTUM, ANUS AND ANAL CANAL | 1548 | MAL NEO RECTUM/ANUS NEC  |
| C22  | Malignant neoplasm of liver and intrahepatic bile ducts                | 155  | MALIGNANT NEOPLASM LIVER |
| C228 | MALIGNANT NEOPLASM OF LIVER, PRIMARY, UNSPECIFIED AS TO TYPE           | 1550 | MAL NEO LIVER, PRIMARY   |
| C221 | INTRAHEPATIC BILE DUCT CARCINOMA                                       | 1551 | MAL NEO INTRAHEPAT DUCTS |
| C229 | MALIGNANT NEOPLASM OF LIVER, NOT SPECIFIED AS PRIMARY OR SECONDARY     | 1552 | MALIGNANT NEO LIVER NOS  |
| C248 | MALIGNANT NEOPLASM OF OVERLAPPING SITES OF BILIARY TRACT               | 156  | MAL NEO GB/EXTRAHEPATIC  |
| C23  | MALIGNANT NEOPLASM OF GALLBLADDER                                      | 1560 | MALIG NEO GALLBLADDER    |
| C240 | MALIGNANT NEOPLASM OF EXTRAHEPATIC BILE DUCT                           | 1561 | MAL NEO EXTRAHEPAT DUCTS |
| C241 | MALIGNANT NEOPLASM OF AMPULLA OF VATER                                 | 1562 | MAL NEO AMPULLA OF VATER |

|      |                                                                     |      |                          |
|------|---------------------------------------------------------------------|------|--------------------------|
| C248 | MALIGNANT NEOPLASM OF OVERLAPPING SITES OF BILIARY TRACT            | 1568 | MALIG NEO BILIARY NEC    |
| C249 | MALIGNANT NEOPLASM OF BILIARY TRACT, UNSPECIFIED                    | 1569 | MALIG NEO BILIARY NOS    |
| C25  | Malignant neoplasm of pancreas                                      | 157  | MALIGNANT NEO PANCREAS   |
| C250 | MALIGNANT NEOPLASM OF HEAD OF PANCREAS                              | 1570 | MAL NEO PANCREAS HEAD    |
| C251 | MALIGNANT NEOPLASM OF BODY OF PANCREAS                              | 1571 | MAL NEO PANCREAS BODY    |
| C252 | MALIGNANT NEOPLASM OF TAIL OF PANCREAS                              | 1572 | MAL NEO PANCREAS TAIL    |
| C253 | MALIGNANT NEOPLASM OF PANCREATIC DUCT                               | 1573 | MAL NEO PANCREATIC DUCT  |
| C254 | MALIGNANT NEOPLASM OF ENDOCRINE PANCREAS                            | 1574 | MAL NEO ISLET LANGERHANS |
| C257 | MALIGNANT NEOPLASM OF OTHER PARTS OF PANCREAS                       | 1578 | MALIG NEO PANCREAS NEC   |
| C259 | MALIGNANT NEOPLASM OF PANCREAS, UNSPECIFIED                         | 1579 | MALIG NEO PANCREAS NOS   |
| C48  | Malignant neoplasm of retroperitoneum and peritoneum                | 158  | MALIG NEO PERITONEUM     |
| C480 | MALIGNANT NEOPLASM OF RETROPERITONEUM                               | 1580 | MAL NEO RETROPERITONEUM  |
| C481 | MALIGNANT NEOPLASM OF SPECIFIED PARTS OF PERITONEUM                 | 1588 | MAL NEO PERITONEUM NEC   |
| C482 | MALIGNANT NEOPLASM OF PERITONEUM, UNSPECIFIED                       | 1589 | MAL NEO PERITONEUM NOS   |
| C26  | Malignant neoplasm of other and ill-defined digestive organs        | 159  | OTH MALIG NEO GI/PERITON |
| C260 | MALIGNANT NEOPLASM OF INTESTINAL TRACT, PART UNSPECIFIED            | 1590 | MALIG NEO INTESTINE NOS  |
| C261 | MALIGNANT NEOPLASM OF SPLEEN                                        | 1591 | MALIGNANT NEO SPLEEN NEC |
| C269 | MALIGNANT NEOPLASM OF ILL-DEFINED SITES WITHIN THE DIGESTIVE SYSTEM | 1598 | MAL NEO GI/INTRA-ABD NEC |
| C269 | MALIGNANT NEOPLASM OF ILL-DEFINED SITES WITHIN THE DIGESTIVE SYSTEM | 1599 | MAL NEO GI TRACT ILL-DEF |
| C30  | Malignant neoplasm of respiratory and intrathoracic organs          | 160  | MAL NEO NASAL CAV/SINUS  |
| C300 | MALIGNANT NEOPLASM OF NASAL CAVITY                                  | 1600 | MAL NEO NASAL CAVITIES   |
| C301 | MALIGNANT NEOPLASM OF MIDDLE EAR                                    | 1601 | MALIG NEO MIDDLE EAR     |
| C310 | MALIGNANT NEOPLASM OF MAXILLARY SINUS                               | 1602 | MAL NEO MAXILLARY SINUS  |
| C311 | MALIGNANT NEOPLASM OF ETHMOIDAL SINUS                               | 1603 | MAL NEO ETHMOIDAL SINUS  |
| C312 | MALIGNANT NEOPLASM OF FRONTAL SINUS                                 | 1604 | MALIG NEO FRONTAL SINUS  |
| C313 | MALIGNANT NEOPLASM OF SPHENOID SINUS                                | 1605 | MAL NEO SPHENOID SINUS   |
| C318 | MALIGNANT NEOPLASM OF OVERLAPPING SITES OF ACCESSORY SINUSES        | 1608 | MAL NEO ACCESS SINUS NEC |
| C319 | MALIGNANT NEOPLASM OF ACCESSORY SINUS, UNSPECIFIED                  | 1609 | MAL NEO ACCESS SINUS NOS |
| C32  | Malignant neoplasm of larynx                                        | 161  | MALIGNANT NEO LARYNX     |
| C320 | MALIGNANT NEOPLASM OF GLOTTIS                                       | 1610 | MALIGNANT NEO GLOTTIS    |
| C321 | MALIGNANT NEOPLASM OF SUPRAGLOTTIS                                  | 1611 | MALIG NEO SUPRAGLOTTIS   |
| C322 | MALIGNANT NEOPLASM OF SUBGLOTTIS                                    | 1612 | MALIG NEO SUBGLOTTIS     |
| C323 | MALIGNANT NEOPLASM OF LARYNGEAL CARTILAGE                           | 1613 | MAL NEO CARTILAGE LARYNX |
| C328 | MALIGNANT NEOPLASM OF OVERLAPPING SITES OF LARYNX                   | 1618 | MALIGNANT NEO LARYNX NEC |
| C329 | MALIGNANT NEOPLASM OF LARYNX, UNSPECIFIED                           | 1619 | MALIGNANT NEO LARYNX NOS |
| C34  | Malignant neoplasm of trachea and lung                              | 162  | MAL NEO TRACHEA/LUNG*    |
| C33  | Malignant neoplasm of trachea                                       | 1620 | MALIGNANT NEO TRACHEA    |
| C340 | Malignant neoplasm of main bronchus                                 | 1622 | MALIG NEO MAIN BRONCHUS  |
| C341 | Malignant neoplasm of upper lobe, bronchus or lung                  | 1623 | MAL NEO UPPER LOBE LUNG  |
| C342 | Malignant neoplasm of middle lobe, bronchus or lung                 | 1624 | MAL NEO MIDDLE LOBE LUNG |
| C343 | Malignant neoplasm of lower lobe, bronchus or lung                  | 1625 | MAL NEO LOWER LOBE LUNG  |
| C348 | Malignant neoplasm of overlapping sites of bronchus and lung        | 1628 | MAL NEO BRONCH/LUNG NEC  |
| C349 | Malignant neoplasm of unspecified part of bronchus or lung          | 1629 | MAL NEO BRONCH/LUNG NOS  |
| C384 | MALIGNANT NEOPLASM OF PLEURA                                        | 163  | MALIGNANT NEOPL PLEURA   |



|       |                                                                                                      |      |                          |
|-------|------------------------------------------------------------------------------------------------------|------|--------------------------|
| C384  | MALIGNANT NEOPLASM OF PLEURA                                                                         | 1630 | MAL NEO PARIETAL PLEURA  |
| C384  | MALIGNANT NEOPLASM OF PLEURA                                                                         | 1631 | MAL NEO VISCERAL PLEURA  |
| C384  | MALIGNANT NEOPLASM OF PLEURA                                                                         | 1638 | MALIG NEOPL PLEURA NEC   |
| C384  | MALIGNANT NEOPLASM OF PLEURA                                                                         | 1639 | MALIG NEOPL PLEURA NOS   |
| C457  | MALIGNANT NEOPLASM OF MEDIASTINUM, PART UNSPECIFIED                                                  | 164  | MAL NEO THYMUS/MEDIASTIN |
| C37   | Malignant neoplasm of thymus                                                                         | 1640 | MALIGNANT NEOPL THYMUS   |
| C380  | MALIGNANT NEOPLASM OF HEART                                                                          | 1641 | MALIGNANT NEOPL HEART    |
| C381  | MALIGNANT NEOPLASM OF ANTERIOR MEDIASTINUM                                                           | 1642 | MAL NEO ANT MEDIASTINUM  |
| C382  | MALIGNANT NEOPLASM OF POSTERIOR MEDIASTINUM                                                          | 1643 | MAL NEO POST MEDIASTINUM |
| C388  | MALIGNANT NEOPLASM OF OVERLAPPING SITES OF HEART, MEDIASTINUM AND PLEURA                             | 1648 | MAL NEO MEDIASTINUM NEC  |
| C457  | MALIGNANT NEOPLASM OF MEDIASTINUM, PART UNSPECIFIED                                                  | 1649 | MAL NEO MEDIASTINUM NOS  |
| C39   | Malignant neoplasm of other and ill-defined sited in the respiratory system and intrathoracic organs | 165  | OTH/ILL-DEF MAL NEO RESP |
| C390  | MALIGNANT NEOPLASM OF UPPER RESPIRATORY TRACT, PART UNSPECIFIED                                      | 1650 | MAL NEO UPPER RESP NOS   |
| C399  | MALIGNANT NEOPLASM OF LOWER RESPIRATORY TRACT, PART UNSPECIFIED                                      | 1658 | MAL NEO THORAX/RESP NEC  |
| C399  | MALIGNANT NEOPLASM OF LOWER RESPIRATORY TRACT, PART UNSPECIFIED                                      | 1659 | MAL NEO RESP SYSTEM NOS  |
| C41   | Malignant neoplasm of bone and articular cartilage of other and unspecified sites                    | 170  | MAL NEO BONE/ARTIC CART  |
| C410  | MALIGNANT NEOPLASM OF BONES OF SKULL AND FACE                                                        | 1700 | MAL NEO SKULL/FACE BONE  |
| C411  | MALIGNANT NEOPLASM OF MANDIBLE                                                                       | 1701 | MALIGNANT NEO MANDIBLE   |
| C412  | MALIGNANT NEOPLASM OF VERTEBRAL COLUMN                                                               | 1702 | MALIG NEO VERTEBRAE      |
| C413  | MALIGNANT NEOPLASM OF RIBS, STERNUM AND CLAVICLE                                                     | 1703 | MAL NEO RIBS/STERN/CLAV  |
| C4000 | MALIGNANT NEOPLASM OF SCAPULA AND LONG BONES OF UNSPECIFIED UPPER LIMB                               | 1704 | MAL NEO LONG BONES ARM   |
| C4010 | MALIGNANT NEOPLASM OF SHORT BONES OF UNSPECIFIED UPPER LIMB                                          | 1705 | MAL NEO BONES WRIST/HAND |
| C414  | MALIGNANT NEOPLASM OF PELVIC BONES, SACRUM AND COCCYX                                                | 1706 | MAL NEO PELVIC GIRDLE    |
| C4020 | MALIGNANT NEOPLASM OF LONG BONES OF UNSPECIFIED LOWER LIMB                                           | 1707 | MAL NEO LONG BONES LEG   |
| C4030 | MALIGNANT NEOPLASM OF SHORT BONES OF UNSPECIFIED LOWER LIMB                                          | 1708 | MAL NEO BONES ANKLE/FOOT |
| C419  | MALIGNANT NEOPLASM OF BONE AND ARTICULAR CARTILAGE, UNSPECIFIED                                      | 1709 | MALIG NEOPL BONE NOS     |
| C49   | Malignant neoplasm of other connective and soft tissue                                               | 171  | MAL NEO SOFT TISSUE      |
| C490  | MALIGNANT NEOPLASM OF CONNECTIVE AND SOFT TISSUE OF HEAD, FACE AND NECK                              | 1710 | MAL NEO SOFT TISSUE HEAD |
| C4910 | MALIGNANT NEOPLASM OF CONNECTIVE AND SOFT TISSUE OF UNSPECIFIED UPPER LIMB, INCLUDING SHOULDER       | 1712 | MAL NEO SOFT TISSUE ARM  |
| C4920 | MALIGNANT NEOPLASM OF CONNECTIVE AND SOFT TISSUE OF UNSPECIFIED LOWER LIMB, INCLUDING HIP            | 1713 | MAL NEO SOFT TISSUE LEG  |
| C493  | MALIGNANT NEOPLASM OF CONNECTIVE AND SOFT TISSUE OF THORAX                                           | 1714 | MAL NEO SOFT TIS THORAX  |
| C494  | MALIGNANT NEOPLASM OF CONNECTIVE AND SOFT TISSUE OF ABDOMEN                                          | 1715 | MAL NEO SOFT TIS ABDOMEN |
| C495  | MALIGNANT NEOPLASM OF CONNECTIVE AND SOFT TISSUE OF PELVIS                                           | 1716 | MAL NEO SOFT TIS PELVIS  |
| C496  | MALIGNANT NEOPLASM OF CONNECTIVE AND SOFT TISSUE OF TRUNK, UNSPECIFIED                               | 1717 | MAL NEOPL TRUNK NOS      |
| C498  | MALIGNANT NEOPLASM OF OVERLAPPING SITES OF CONNECTIVE AND SOFT TISSUE                                | 1718 | MAL NEO SOFT TISSUE NEC  |
| C499  | MALIGNANT NEOPLASM OF CONNECTIVE AND SOFT TISSUE, UNSPECIFIED                                        | 1719 | MAL NEO SOFT TISSUE NOS  |
| C43   | Malignant melanoma of skin                                                                           | 172  | MALIGNANT MELANOMA SKIN  |
| C430  | MALIGNANT MELANOMA OF LIP                                                                            | 1720 | MALIG MELANOMA LIP       |
| C4310 | MALIGNANT MELANOMA OF UNSPECIFIED EYELID, INCLUDING CANTHUS                                          | 1721 | MALIG MELANOMA EYELID    |
| C4320 | MALIGNANT MELANOMA OF UNSPECIFIED EAR AND EXTERNAL AURICULAR CANAL                                   | 1722 | MALIG MELANOMA EAR       |
| C4330 | MALIGNANT MELANOMA OF UNSPECIFIED PART OF FACE                                                       | 1723 | MAL MELANOM FACE NEC/NOS |
| C434  | MALIGNANT MELANOMA OF SCALP AND NECK                                                                 | 1724 | MAL MELANOMA SCALP/NECK  |

|        |                                                                         |      |                           |
|--------|-------------------------------------------------------------------------|------|---------------------------|
| C435   | Malignant melanoma of trunk                                             | 1725 | MALIG MELANOMA TRUNK      |
| C4360  | MALIGNANT MELANOMA OF UNSPECIFIED UPPER LIMB, INCLUDING SHOULDER        | 1726 | MALIG MELANOMA ARM        |
| C4370  | MALIGNANT MELANOMA OF UNSPECIFIED LOWER LIMB, INCLUDING HIP             | 1727 | MALIG MELANOMA LEG        |
| C438   | MALIGNANT MELANOMA OF OVERLAPPING SITES OF SKIN                         | 1728 | MALIG MELANOMA SKIN NEC   |
| C439   | MALIGNANT MELANOMA OF SKIN, UNSPECIFIED                                 | 1729 | MALIG MELANOMA SKIN NOS   |
| C5091  | Malignant neoplasm of breast of unspecified site, female                | 174  | MALIG NEO FEMALE BREAST   |
| C500   | Malignant neoplasm of nipple and areola                                 | 1740 | MALIG NEO NIPPLE          |
| C50119 | MALIGNANT NEOPLASM OF CENTRAL PORTION OF UNSPECIFIED FEMALE BREAST      | 1741 | MAL NEO BREAST-CENTRAL    |
| C50219 | MALIGNANT NEOPLASM OF UPPER-INNER QUADRANT OF UNSPECIFIED FEMALE BREAST | 1742 | MAL NEO BREAST UP-INNER   |
| C50319 | MALIGNANT NEOPLASM OF LOWER-INNER QUADRANT OF UNSPECIFIED FEMALE BREAST | 1743 | MAL NEO BREAST LOW-INNER  |
| C50419 | MALIGNANT NEOPLASM OF UPPER-OUTER QUADRANT OF UNSPECIFIED FEMALE BREAST | 1744 | MAL NEO BREAST UP-OUTER   |
| C50519 | MALIGNANT NEOPLASM OF LOWER-OUTER QUADRANT OF UNSPECIFIED FEMALE BREAST | 1745 | MAL NEO BREAST LOW-OUTER  |
| C50619 | MALIGNANT NEOPLASM OF AXILLARY TAIL OF UNSPECIFIED FEMALE BREAST        | 1746 | MAL NEO BREAST-AXILLARY   |
| C50819 | MALIGNANT NEOPLASM OF OVERLAPPING SITES OF UNSPECIFIED FEMALE BREAST    | 1748 | MALIGN NEOPL BREAST NEC   |
| C50919 | MALIGNANT NEOPLASM OF UNSPECIFIED SITE OF UNSPECIFIED FEMALE BREAST     | 1749 | MALIGN NEOPL BREAST NOS   |
| C50929 | MALIGNANT NEOPLASM OF UNSPECIFIED SITE OF UNSPECIFIED MALE BREAST       | 175  | MALIG NEO MALE BREAST     |
| C50929 | MALIGNANT NEOPLASM OF UNSPECIFIED SITE OF UNSPECIFIED MALE BREAST       | 1759 | MAL NEO MALE BREAST NEC   |
| C46    | NULL                                                                    | 176  | Kaposi's sarcoma          |
| C460   | KAPOSI'S SARCOMA OF SKIN                                                | 1760 | SKIN - KAPOSI'S SARCOMA   |
| C461   | KAPOSI'S SARCOMA OF SOFT TISSUE                                         | 1761 | SFT TISUE - KPSI'S SRCMA  |
| C462   | KAPOSI'S SARCOMA OF PALATE                                              | 1762 | PALATE - KPSI's SARCOMA   |
| C464   | KAPOSI'S SARCOMA OF GASTROINTESTINAL SITES                              | 1763 | GI SITES - KPSI'S SRCOMA  |
| C4650  | KAPOSI'S SARCOMA OF UNSPECIFIED LUNG                                    | 1764 | LUNG - KAPOSI'S SARCOMA   |
| C463   | KAPOSI'S SARCOMA OF LYMPH NODES                                         | 1765 | LYM NDS - KPSI'S SARCOMA  |
| C467   | KAPOSI'S SARCOMA OF OTHER SITES                                         | 1768 | SPF STS - KPSI'S SARCOMA  |
| C469   | KAPOSI'S SARCOMA, UNSPECIFIED                                           | 1769 | KAPOSI'S SARCOMA NOS      |
| C55    | MALIGNANT NEOPLASM OF UTERUS, PART UNSPECIFIED                          | 179  | MALIG NEOPL UTERUS NOS    |
| C53    | Malignant neoplasm of cervix uteri                                      | 180  | MALIG NEOPL CERVIX UTERI* |
| C530   | MALIGNANT NEOPLASM OF ENDOCERVIX                                        | 1800 | MALIG NEO ENDOCERVIX      |
| C531   | MALIGNANT NEOPLASM OF EXOCERVIX                                         | 1801 | MALIG NEO EXOCERVIX       |
| C538   | MALIGNANT NEOPLASM OF OVERLAPPING SITES OF CERVIX UTERI                 | 1808 | MALIG NEO CERVIX NEC      |
| C539   | MALIGNANT NEOPLASM OF CERVIX UTERI, UNSPECIFIED                         | 1809 | MAL NEO CERVIX UTERI NOS  |
| C574   | MALIGNANT NEOPLASM OF UTERINE ADNEXA, UNSPECIFIED                       | 183  | MAL NEO UTERINE ADNEXA*   |
| C569   | MALIGNANT NEOPLASM OF UNSPECIFIED OVARY                                 | 1830 | MALIGN NEOPL OVARY        |
| C5700  | MALIGNANT NEOPLASM OF UNSPECIFIED FALLOPIAN TUBE                        | 1832 | MAL NEO FALLOPIAN TUBE    |
| C5710  | MALIGNANT NEOPLASM OF UNSPECIFIED BROAD LIGAMENT                        | 1833 | MAL NEO BROAD LIGAMENT    |
| C573   | MALIGNANT NEOPLASM OF PARAMETRIUM                                       | 1834 | MALIG NEO PARAMETRIUM     |
| C5720  | MALIGNANT NEOPLASM OF UNSPECIFIED ROUND LIGAMENT                        | 1835 | MAL NEO ROUND LIGAMENT    |
| C577   | MALIGNANT NEOPLASM OF UTERINE ADNEXA, UNSPECIFIED                       | 1838 | MAL NEO ADNEXA NEC        |
| C574   | MALIGNANT NEOPLASM OF UTERINE ADNEXA, UNSPECIFIED                       | 1839 | MAL NEO ADNEXA NOS        |
| C57    | Malignant neoplasm of other and unspecified female genital organs       | 184  | MAL NEO FEM GEN NEC/NOS*  |
| C52    | MALIGNANT NEOPLASM OF VAGINA                                            | 1840 | MALIGN NEOPL VAGINA       |
| C510   | MALIGNANT NEOPLASM OF LABIUM MAJUS                                      | 1841 | MAL NEO LABIA MAJORA      |
| C511   | MALIGNANT NEOPLASM OF LABIUM MINUS                                      | 1842 | MAL NEO LABIA MINORA      |

|       |                                                                                        |      |                           |
|-------|----------------------------------------------------------------------------------------|------|---------------------------|
| C512  | MALIGNANT NEOPLASM OF CLITORIS                                                         | 1843 | MALIGN NEOPL CLITORIS     |
| C519  | MALIGNANT NEOPLASM OF VULVA, UNSPECIFIED                                               | 1844 | MALIGN NEOPL VULVA NOS    |
| C577  | MALIGNANT NEOPLASM OF OTHER SPECIFIED FEMALE GENITAL ORGANS                            | 1848 | MAL NEO FEMALE GENIT NEC  |
| C579  | MALIGNANT NEOPLASM OF FEMALE GENITAL ORGAN, UNSPECIFIED                                | 1849 | MAL NEO FEMALE GENIT NOS  |
| C61   | MALIGNANT NEOPLASM OF PROSTATE                                                         | 185  | MALIGN NEOPL PROSTATE     |
| C62   | Malignant neoplasm of testis                                                           | 186  | MALIGN NEOPL TESTIS*      |
| C6200 | MALIGNANT NEOPLASM OF UNSPECIFIED UNDESCENDED TESTIS                                   | 1860 | MAL NEO UNDESCEND TESTIS  |
| C6290 | MALIGNANT NEOPLASM OF UNSPECIFIED TESTIS, UNSPECIFIED WHETHER DESCENDED OR UNDESCENDED | 1869 | MALIG NEO TESTIS NEC      |
| C639  | MALIGNANT NEOPLASM OF MALE GENITAL ORGAN, UNSPECIFIED                                  | 187  | MAL NEO MALE GENITAL NEC* |
| C600  | MALIGNANT NEOPLASM OF PREPUCE                                                          | 1871 | MALIGN NEOPL PREPUCE      |
| C601  | MALIGNANT NEOPLASM OF GLANS PENIS                                                      | 1872 | MALIG NEO GLANS PENIS     |
| C602  | MALIGNANT NEOPLASM OF BODY OF PENIS                                                    | 1873 | MALIG NEO PENIS BODY      |
| C609  | MALIGNANT NEOPLASM OF PENIS, UNSPECIFIED                                               | 1874 | MALIG NEO PENIS NOS       |
| C6300 | MALIGNANT NEOPLASM OF UNSPECIFIED EPIDIDYMIS                                           | 1875 | MALIG NEO EPIDIDYMIS      |
| C6310 | MALIGNANT NEOPLASM OF UNSPECIFIED SPERMATIC CORD                                       | 1876 | MAL NEO SPERMATIC CORD    |
| C632  | MALIGNANT NEOPLASM OF SCROTUM                                                          | 1877 | MALIGN NEOPL SCROTUM      |
| C637  | MALIGNANT NEOPLASM OF OTHER SPECIFIED MALE GENITAL ORGANS                              | 1878 | MAL NEO MALE GENITAL NEC  |
| C639  | MALIGNANT NEOPLASM OF MALE GENITAL ORGAN, UNSPECIFIED                                  | 1879 | MAL NEO MALE GENITAL NOS  |
| C67   | MALIGNANT NEOPLASM OF BLADDER                                                          | 188  | MALIGN NEOPL BLADDER*     |
| C670  | MALIGNANT NEOPLASM OF TRIGONE OF BLADDER                                               | 1880 | MAL NEO BLADDER-TRIGONE   |
| C671  | MALIGNANT NEOPLASM OF DOME OF BLADDER                                                  | 1881 | MAL NEO BLADDER-DOME      |
| C672  | MALIGNANT NEOPLASM OF LATERAL WALL OF BLADDER                                          | 1882 | MAL NEO BLADDER-LATERAL   |
| C673  | MALIGNANT NEOPLASM OF ANTERIOR WALL OF BLADDER                                         | 1883 | MAL NEO BLADDER-ANTERIOR  |
| C674  | MALIGNANT NEOPLASM OF POSTERIOR WALL OF BLADDER                                        | 1884 | MAL NEO BLADDER-POST      |
| C675  | MALIGNANT NEOPLASM OF BLADDER NECK                                                     | 1885 | MAL NEO BLADDER NECK      |
| C676  | MALIGNANT NEOPLASM OF URETERIC ORIFICE                                                 | 1886 | MAL NEO URETERIC ORIFICE  |
| C677  | MALIGNANT NEOPLASM OF URACHUS                                                          | 1887 | MALIG NEO URACHUS         |
| C678  | MALIGNANT NEOPLASM OF OVERLAPPING SITES OF BLADDER                                     | 1888 | MALIG NEO BLADDER NEC     |
| C679  | MALIGNANT NEOPLASM OF BLADDER, UNSPECIFIED                                             | 1889 | MALIG NEO BLADDER NOS     |
| C68   | Malignant neoplasm of other and unspecified urinary organs                             | 189  | MAL NEO URINARY NEC/NOS*  |
| C64   | MALIGNANT NEOPLASM OF UNSPECIFIED KIDNEY, EXCEPT RENAL PELVIS                          | 1890 | MALIG NEOPL KIDNEY        |
| C65   | MALIGNANT NEOPLASM OF UNSPECIFIED RENAL PELVIS                                         | 1891 | MALIG NEO RENAL PELVIS    |
| C66   | MALIGNANT NEOPLASM OF UNSPECIFIED URETER                                               | 1892 | MALIGN NEOPL URETER       |
| C680  | MALIGNANT NEOPLASM OF URETHRA                                                          | 1893 | MALIGN NEOPL URETHRA      |
| C681  | MALIGNANT NEOPLASM OF PARAURETHRAL GLANDS                                              | 1894 | MAL NEO PARAURETHRAL      |
| C688  | MALIGNANT NEOPLASM OF OVERLAPPING SITES OF URINARY ORGANS                              | 1898 | MAL NEO URINARY NEC       |
| C689  | MALIGNANT NEOPLASM OF URINARY ORGAN, UNSPECIFIED                                       | 1899 | MAL NEO URINARY NOS       |
| C69   | Malignant neoplasm of eye and adnexa                                                   | 190  | MALIGNANT NEOPLASM EYE*   |
| C6940 | MALIGNANT NEOPLASM OF UNSPECIFIED CILIARY BODY                                         | 1900 | MALIGN NEOPL EYEBALL      |
| C6960 | MALIGNANT NEOPLASM OF UNSPECIFIED ORBIT                                                | 1901 | MALIGN NEOPL ORBIT        |
| C6950 | MALIGNANT NEOPLASM OF UNSPECIFIED LACRIMAL GLAND AND DUCT                              | 1902 | MAL NEO LACRIMAL GLAND    |
| C6900 | MALIGNANT NEOPLASM OF UNSPECIFIED CONJUNCTIVA                                          | 1903 | MAL NEO CONJUNCTIVA       |
| C6910 | MALIGNANT NEOPLASM OF UNSPECIFIED CORNEA                                               | 1904 | MALIGN NEOPL CORNEA       |

|       |                                                                                             |      |                           |
|-------|---------------------------------------------------------------------------------------------|------|---------------------------|
| C6920 | MALIGNANT NEOPLASM OF UNSPECIFIED RETINA                                                    | 1905 | MALIGN NEOPL RETINA       |
| C6930 | MALIGNANT NEOPLASM OF UNSPECIFIED CHOROID                                                   | 1906 | MALIGN NEOPL CHOROID      |
| C6950 | MALIGNANT NEOPLASM OF UNSPECIFIED LACRIMAL GLAND AND DUCT                                   | 1907 | MAL NEO LACRIMAL DUCT     |
| C6980 | MALIGNANT NEOPLASM OF OVERLAPPING SITES OF UNSPECIFIED EYE AND ADNEXA                       | 1908 | MALIGN NEOPL EYE NEC      |
| C699  | MALIGNANT NEOPLASM OF UNSPECIFIED SITE OF UNSPECIFIED EYE                                   | 1909 | MALIGN NEOPL EYE NOS      |
| C71   | Malignant neoplasm of brain                                                                 | 191  | MALIGNANT NEOPLASM BRAIN* |
| C710  | MALIGNANT NEOPLASM OF CEREBRUM, EXCEPT LOBES AND VENTRICLES                                 | 1910 | MALIGN NEOPL CEREBRUM     |
| C711  | MALIGNANT NEOPLASM OF FRONTAL LOBE                                                          | 1911 | MALIG NEO FRONTAL LOBE    |
| C712  | MALIGNANT NEOPLASM OF TEMPORAL LOBE                                                         | 1912 | MAL NEO TEMPORAL LOBE     |
| C713  | MALIGNANT NEOPLASM OF PARIETAL LOBE                                                         | 1913 | MAL NEO PARIETAL LOBE     |
| C714  | MALIGNANT NEOPLASM OF OCCIPITAL LOBE                                                        | 1914 | MAL NEO OCCIPITAL LOBE    |
| C715  | MALIGNANT NEOPLASM OF CEREBRAL VENTRICLE                                                    | 1915 | MAL NEO CEREB VENTRICLE   |
| C716  | MALIGNANT NEOPLASM OF CEREBELLUM                                                            | 1916 | MAL NEO CEREBELLUM NOS    |
| C717  | MALIGNANT NEOPLASM OF BRAIN STEM                                                            | 1917 | MAL NEO BRAIN STEM        |
| C718  | MALIGNANT NEOPLASM OF OVERLAPPING SITES OF BRAIN                                            | 1918 | MALIG NEO BRAIN NEC       |
| C719  | MALIGNANT NEOPLASM OF BRAIN, UNSPECIFIED                                                    | 1919 | MALIG NEO BRAIN NOS       |
| C72   | Malignant neoplasm of spinal cord, cranial nerves and other parts of central nervous system | 192  | MAL NEO NERVE NEC/NOS*    |
| C7250 | MALIGNANT NEOPLASM OF UNSPECIFIED CRANIAL NERVE                                             | 1920 | MAL NEO CRANIAL NERVES    |
| C700  | MALIGNANT NEOPLASM OF CEREBRAL MENINGES                                                     | 1921 | MAL NEO CEREBRAL MENING   |
| C720  | MALIGNANT NEOPLASM OF SPINAL CORD                                                           | 1922 | MAL NEO SPINAL CORD       |
| C701  | MALIGNANT NEOPLASM OF SPINAL MENINGES                                                       | 1923 | MAL NEO SPINAL MENINGES   |
| C728  | MALIGNANT NEOPLASM OF CENTRAL NERVOUS SYSTEM, UNSPECIFIED                                   | 1928 | MAL NEO NERVOUS SYST NEC  |
| C729  | MALIGNANT NEOPLASM OF CENTRAL NERVOUS SYSTEM, UNSPECIFIED                                   | 1929 | MAL NEO NERVOUS SYST NOS  |
| C73   | MALIGNANT NEOPLASM OF THYROID GLAND                                                         | 193  | MALIGN NEOPL THYROID      |
| C759  | MALIGNANT NEOPLASM OF ENDOCRINE GLAND, UNSPECIFIED                                          | 194  | MAL NEO OTHER ENDOCRINE*  |
| C7490 | MALIGNANT NEOPLASM OF UNSPECIFIED PART OF UNSPECIFIED ADRENAL GLAND                         | 1940 | MALIGN NEOPL ADRENAL      |
| C750  | MALIGNANT NEOPLASM OF PARATHYROID GLAND                                                     | 1941 | MALIG NEO PARATHYROID     |
| C751  | MALIGNANT NEOPLASM OF PITUITARY GLAND                                                       | 1943 | MALIG NEO PITUITARY       |
| C753  | MALIGNANT NEOPLASM OF PINEAL GLAND                                                          | 1944 | MALIGN NEO PINEAL GLAND   |
| C754  | MALIGNANT NEOPLASM OF CAROTID BODY                                                          | 1945 | MAL NEO CAROTID BODY      |
| C755  | MALIGNANT NEOPLASM OF AORTIC BODY AND OTHER PARAGANGLIA                                     | 1946 | MAL NEO PARAGANGLIA NEC   |
| C758  | MALIGNANT NEOPLASM WITH PLURIGLANDULAR INVOLVEMENT, UNSPECIFIED                             | 1948 | MAL NEO ENDOCRINE NEC     |
| C759  | MALIGNANT NEOPLASM OF ENDOCRINE GLAND, UNSPECIFIED                                          | 1949 | MAL NEO ENDOCRINE NOS     |
| C76   | Malignant neoplasm of other and ill-defined sites                                           | 195  | MAL NEO OTH/ILL-DEF SITE* |
| C760  | MALIGNANT NEOPLASM OF HEAD, FACE AND NECK                                                   | 1950 | MAL NEO HEAD/FACE/NECK    |
| C761  | MALIGNANT NEOPLASM OF THORAX                                                                | 1951 | MALIGN NEOPL THORAX       |
| C762  | MALIGNANT NEOPLASM OF ABDOMEN                                                               | 1952 | MALIG NEO ABDOMEN         |
| C763  | MALIGNANT NEOPLASM OF PELVIS                                                                | 1953 | MALIGN NEOPL PELVIS       |
| C764  | MALIGNANT NEOPLASM OF UPPER LIMB                                                            | 1954 | MALIGN NEOPL ARM          |
| C765  | MALIGNANT NEOPLASM OF LOWER LIMB                                                            | 1955 | MALIGN NEOPL LEG          |
| C768  | MALIGNANT NEOPLASM OF OTHER SPECIFIED ILL-DEFINED SITES                                     | 1958 | MALIG NEO SITE NEC        |
| C77   | Secondary and unspecified malignant neoplasm of lymph nodes                                 | 196  | MALIG NEO LYMPH NODES*    |
| C770  | SECONDARY AND UNSPECIFIED MALIGNANT NEOPLASM OF LYMPH NODES OF HEAD, FACE AND NECK          | 1960 | MAL NEO LYMPH-HEAD/NECK   |

|       |                                                                                     |       |                           |
|-------|-------------------------------------------------------------------------------------|-------|---------------------------|
| C771  | SECONDARY AND UNSPECIFIED MALIGNANT NEOPLASM OF INTRATHORACIC LYMPH NODES           | 1961  | MAL NEO LYMPH-INTRATHOR   |
| C772  | SECONDARY AND UNSPECIFIED MALIGNANT NEOPLASM OF INTRA-ABDOMINAL LYMPH NODES         | 1962  | MAL NEO LYMPH INTRA-ABD   |
| C773  | SECONDARY AND UNSPECIFIED MALIGNANT NEOPLASM OF AXILLA AND UPPER LIMB LYMPH NODES   | 1963  | MAL NEO LYMPH-AXILLA/ARM  |
| C774  | SECONDARY AND UNSPECIFIED MALIGNANT NEOPLASM OF INGUINAL AND LOWER LIMB LYMPH NODES | 1965  | MAL NEO LYMPH-INGUIN/LEG  |
| C775  | SECONDARY AND UNSPECIFIED MALIGNANT NEOPLASM OF INTRAPELVIC LYMPH NODES             | 1966  | MAL NEO LYMPH-INTRAPELV   |
| C778  | SECONDARY AND UNSPECIFIED MALIGNANT NEOPLASM OF LYMPH NODES OF MULTIPLE REGIONS     | 1968  | MAL NEO LYMPH NODE-MULT   |
| C779  | SECONDARY AND UNSPECIFIED MALIGNANT NEOPLASM OF LYMPH NODE, UNSPECIFIED             | 1969  | MAL NEO LYMPH NODE NOS    |
| C78   | Secondary malignant neoplasm of respiratory and digestive organs                    | 197   | SECONDRY MAL NEO GI/RESP* |
| C7800 | SECONDARY MALIGNANT NEOPLASM OF UNSPECIFIED LUNG                                    | 1970  | SECONDARY MALIG NEO LUNG  |
| C781  | SECONDARY MALIGNANT NEOPLASM OF MEDIASTINUM                                         | 1971  | SEC MAL NEO MEDIASTINUM   |
| C782  | SECONDARY MALIGNANT NEOPLASM OF PLEURA                                              | 1972  | SECOND MALIG NEO PLEURA   |
| C7839 | SECONDARY MALIGNANT NEOPLASM OF OTHER RESPIRATORY ORGANS                            | 1973  | SEC MALIG NEO RESP NEC    |
| C784  | SECONDARY MALIGNANT NEOPLASM OF SMALL INTESTINE                                     | 1974  | SEC MALIG NEO SM BOWEL    |
| C785  | SECONDARY MALIGNANT NEOPLASM OF LARGE INTESTINE AND RECTUM                          | 1975  | SEC MALIG NEO LG BOWEL    |
| C786  | SECONDARY MALIGNANT NEOPLASM OF RETROPERITONEUM AND PERITONEUM                      | 1976  | SEC MAL NEO PERITONEUM    |
| C787  | SECONDARY MALIGNANT NEOPLASM OF LIVER AND INTRAHEPATIC BILE DUCT                    | 1977  | SECOND MALIG NEO LIVER    |
| C788  | SECONDARY MALIGNANT NEOPLASM OF OTHER DIGESTIVE ORGANS                              | 1978  | SEC MAL NEO GI NEC        |
| C79   | Secondary malignant neoplasm of other and unspecified sites                         | 198   | SEC MALIG NEO OTH SITES*  |
| C7900 | SECONDARY MALIGNANT NEOPLASM OF UNSPECIFIED KIDNEY AND RENAL PELVIS                 | 1980  | SECOND MALIG NEO KIDNEY   |
| C7919 | SECONDARY MALIGNANT NEOPLASM OF OTHER URINARY ORGANS                                | 1981  | SEC MALIG NEO URIN NEC    |
| C792  | SECONDARY MALIGNANT NEOPLASM OF SKIN                                                | 1982  | SECONDARY MALIG NEO SKIN  |
| C7931 | SECONDARY MALIGNANT NEOPLASM OF BRAIN                                               | 1983  | SEC MAL NEO BRAIN/SPINE   |
| C7949 | SECONDARY MALIGNANT NEOPLASM OF OTHER PARTS OF NERVOUS SYSTEM                       | 1984  | SEC MALIG NEO NERVE NEC   |
| C795  | Secondary malignant neoplasm of bone and bone marrow                                | 1985  | SECONDARY MALIG NEO BONE  |
| C7960 | SECONDARY MALIGNANT NEOPLASM OF UNSPECIFIED OVARY                                   | 1986  | SECOND MALIG NEO OVARY    |
| C797  | SECONDARY MALIGNANT NEOPLASM OF UNSPECIFIED ADRENAL GLAND                           | 1987  | SECOND MALIG NEO ADRENAL  |
| C798  | Secondary malignant neoplasm of other specified sites                               | 1988  | OTH SECONDARY MALIG NEO*  |
| C7981 | SECONDARY MALIGNANT NEOPLASM OF BREAST                                              | 19881 | SECOND MALIG NEO BREAST   |
| 19882 | SECONDARY MALIGNANT NEOPLASM OF GENITAL ORGANS                                      | 19882 | SECOND MALIG NEO GENITAL  |
| C7989 | SECONDARY MALIGNANT NEOPLASM OF OTHER SPECIFIED SITES                               | 19889 | SECONDARY MALIG NEO NEC   |
| C80   | Malignant neoplasm without specification of site                                    | 199   | MALIGNANT NEOPLASM NOS*   |
| C800  | DISSEMINATED MALIGNANT NEOPLASM, UNSPECIFIED                                        | 1990  | MALIG NEO DISSEMINATED    |
| C801  | MALIGNANT (PRIMARY) NEOPLASM, UNSPECIFIED                                           | 1991  | MALIGNANT NEOPLASM NOS    |
| C8331 | Non-follicular lymphoma                                                             | 200   | LYMPHOSARC/RETICULOSARC*  |
| C830  | Diffuse large B-cell lymphoma, unspecified site                                     | 2000  | RETICULOSARCOMA*          |
| C8330 | DIFFUSE LARGE B-CELL LYMPHOMA, UNSPECIFIED SITE                                     | 20000 | RETCLSRC UNSP XTRNDL ORG  |
| C8331 | DIFFUSE LARGE B-CELL LYMPHOMA, LYMPH NODES OF HEAD, FACE, AND NECK                  | 20001 | RETICULOSARCOMA HEAD      |
| C8332 | DIFFUSE LARGE B-CELL LYMPHOMA, INTRATHORACIC LYMPH NODES                            | 20002 | RETICULOSARCOMA THORAX    |
| C8333 | DIFFUSE LARGE B-CELL LYMPHOMA, INTRA-ABDOMINAL LYMPH NODES                          | 20003 | RETICULOSARCOMA ABDOM     |
| C8334 | DIFFUSE LARGE B-CELL LYMPHOMA, LYMPH NODES OF AXILLA AND UPPER LIMB                 | 20004 | RETICULOSARCOMA AXILLA    |
| C8335 | DIFFUSE LARGE B-CELL LYMPHOMA, LYMPH NODES OF INGUINAL REGION AND LOWER LIMB        | 20005 | RETICULOSARCOMA INGUIN    |
| C8336 | DIFFUSE LARGE B-CELL LYMPHOMA, INTRAPELVIC LYMPH NODES                              | 20006 | RETICULOSARCOMA PELVIC    |
| C8337 | DIFFUSE LARGE B-CELL LYMPHOMA, SPLEEN                                               | 20007 | RETICULOSARCOMA SPLEEN    |

|       |                                                                                 |       |                                                                            |
|-------|---------------------------------------------------------------------------------|-------|----------------------------------------------------------------------------|
| C8338 | DIFFUSE LARGE B-CELL LYMPHOMA, LYMPH NODES OF MULTIPLE SITES                    | 20008 | RETICULOSARCOMA MULT                                                       |
| C835  | Lymphoblastic (diffuse) lymphoma                                                | 2001  | LYMPHOSARCOMA*                                                             |
| C8350 | LYMPHOBLASTIC (DIFFUSE) LYMPHOMA, UNSPECIFIED SITE                              | 20010 | LYMPHSRC UNSP XTRNDL ORG                                                   |
| C8351 | LYMPHOBLASTIC (DIFFUSE) LYMPHOMA, LYMPH NODES OF HEAD, FACE, AND NECK           | 20011 | LYMPHOSARCOMA HEAD                                                         |
| C8352 | LYMPHOBLASTIC (DIFFUSE) LYMPHOMA, INTRATHORACIC LYMPH NODES                     | 20012 | LYMPHOSARCOMA THORAX                                                       |
| C8353 | LYMPHOBLASTIC (DIFFUSE) LYMPHOMA, INTRA-ABDOMINAL LYMPH NODES                   | 20013 | LYMPHOSARCOMA ABDOM                                                        |
| C8354 | LYMPHOBLASTIC (DIFFUSE) LYMPHOMA, LYMPH NODES OF AXILLA AND UPPER LIMB          | 20014 | LYMPHOSARCOMA AXILLA                                                       |
| C8355 | LYMPHOBLASTIC (DIFFUSE) LYMPHOMA, LYMPH NODES OF INGUINAL REGION AND LOWER LIMB | 20015 | LYMPHOSARCOMA INGUIN                                                       |
| C8356 | LYMPHOBLASTIC (DIFFUSE) LYMPHOMA, INTRAPELVIC LYMPH NODES                       | 20016 | LYMPHOSARCOMA PELVIC                                                       |
| C8357 | LYMPHOBLASTIC (DIFFUSE) LYMPHOMA, SPLEEN                                        | 20017 | LYMPHOSARCOMA SPLEEN                                                       |
| C8358 | LYMPHOBLASTIC (DIFFUSE) LYMPHOMA, LYMPH NODES OF MULTIPLE SITES                 | 20018 | LYMPHOSARCOMA MULT                                                         |
| C837  | Burkitt lymphoma                                                                | 2002  | BURKITT'S TUMOR/LYMPHOMA*                                                  |
| C8370 | BURKITT LYMPHOMA, UNSPECIFIED SITE                                              | 20020 | BRKT TMR UNSP XTRNDL ORG                                                   |
| C8371 | BURKITT LYMPHOMA, LYMPH NODES OF HEAD, FACE, AND NECK                           | 20021 | BURKITT'S TUMOR HEAD                                                       |
| C8372 | BURKITT LYMPHOMA, INTRATHORACIC LYMPH NODES                                     | 20022 | BURKITT'S TUMOR THORAX                                                     |
| C8373 | BURKITT LYMPHOMA, INTRA-ABDOMINAL LYMPH NODES                                   | 20023 | BURKITT'S TUMOR ABDOM                                                      |
| C8374 | BURKITT LYMPHOMA, LYMPH NODES OF AXILLA AND UPPER LIMB                          | 20024 | BURKITT'S TUMOR AXILLA                                                     |
| C8375 | BURKITT LYMPHOMA, LYMPH NODES OF INGUINAL REGION AND LOWER LIMB                 | 20025 | BURKITT'S TUMOR INGUIN                                                     |
| C8376 | BURKITT LYMPHOMA, INTRAPELVIC LYMPH NODES                                       | 20026 | BURKITT'S TUMOR PELVIC                                                     |
| C8377 | BURKITT LYMPHOMA, SPLEEN                                                        | 20027 | BURKITT'S TUMOR SPLEEN                                                     |
| C8378 | BURKITT LYMPHOMA, LYMPH NODES OF MULTIPLE SITES                                 | 20028 | BURKITT'S TUMOR MULT                                                       |
| C8389 | OTHER NON-FOLLICULAR LYMPHOMA, EXTRANODAL AND SOLID ORGAN SITES                 | 20030 | MARGINAL ZONE LYMPHOMA, UNSPECIFIED SITE, EXTRANODAL AND SOLID ORGAN SITES |
| C8381 | OTHER NON-FOLLICULAR LYMPHOMA, LYMPH NODES OF HEAD, FACE, AND NECK              | 20031 | MARGINAL ZONE LYMPHOMA, LYMPH NODES OF HEAD, FACE AND NECK                 |
| C8382 | OTHER NON-FOLLICULAR LYMPHOMA, INTRATHORACIC LYMPH NODES                        | 20032 | MARGINAL ZONE LYMPHOMA, INTRATHORACIC LYMPH NODES                          |
| C8383 | OTHER NON-FOLLICULAR LYMPHOMA, INTRA-ABDOMINAL LYMPH NODES                      | 20033 | MARGINAL ZONE LYMPHOMA, INTRAABDOMINAL LYMPH NODES                         |
| C8384 | OTHER NON-FOLLICULAR LYMPHOMA, LYMPH NODES OF AXILLA AND UPPER LIMB             | 20034 | MARGINAL ZONE LYMPHOMA, LYMPH NODES OF AXILLA AND UPPER LIMB               |
| C8385 | OTHER NON-FOLLICULAR LYMPHOMA, LYMPH NODES OF INGUINAL REGION AND LOWER LIMB    | 20035 | MARGINAL ZONE LYMPHOMA, LYMPH NODES OF INGUINAL REGION AND LOWER LIMB      |
| C8386 | OTHER NON-FOLLICULAR LYMPHOMA, INTRAPELVIC LYMPH NODES                          | 20036 | MARGINAL ZONE LYMPHOMA, INTRAPELVIC LYMPH NODES                            |
| C8387 | OTHER NON-FOLLICULAR LYMPHOMA, SPLEEN                                           | 20037 | MARGINAL ZONE LYMPHOMA, SPLEEN                                             |
| C8388 | OTHER NON-FOLLICULAR LYMPHOMA, LYMPH NODES OF MULTIPLE SITES                    | 20038 | MARGINAL ZONE LYMPHOMA, LYMPH NODES OF MULTIPLE SITES                      |
| C8319 | MANTLE CELL LYMPHOMA, EXTRANODAL AND SOLID ORGAN SITES                          | 20040 | MANTLE CELL LYMPHOMA, UNSPECIFIED SITE, EXTRANODAL AND SOLID ORGAN SITES   |
| C8311 | MANTLE CELL LYMPHOMA, LYMPH NODES OF HEAD, FACE, AND NECK                       | 20041 | MANTLE CELL LYMPHOMA, LYMPH NODES OF HEAD, FACE AND NECK                   |
| C8312 | MANTLE CELL LYMPHOMA, INTRATHORACIC LYMPH NODES                                 | 20042 | MANTLE CELL LYMPHOMA, INTRATHORACIC LYMPH NODES                            |
| C8313 | MANTLE CELL LYMPHOMA, INTRA-ABDOMINAL LYMPH NODES                               | 20043 | MANTLE CELL LYMPHOMA, INTRA-ABDOMINAL LYMPH NODES                          |
| C8314 | MANTLE CELL LYMPHOMA, LYMPH NODES OF AXILLA AND UPPER LIMB                      | 20044 | MANTLE CELL LYMPHOMA, LYMPH NODES OF AXILLA AND UPPER LIMB                 |
| C8315 | MANTLE CELL LYMPHOMA, LYMPH NODES OF INGUINAL REGION AND LOWER LIMB             | 20045 | MANTLE CELL LYMPHOMA, LYMPH NODES OF INGUINAL REGION AND LOWER LIMB        |

|       |                                                                                             |       |                                                                                             |
|-------|---------------------------------------------------------------------------------------------|-------|---------------------------------------------------------------------------------------------|
| C8316 | MANTLE CELL LYMPHOMA, INTRAPELVIC LYMPH NODES                                               | 20046 | MANTLE CELL LYMPHOMA, INTRAPELVIC LYMPH NODES                                               |
| C8317 | MANTLE CELL LYMPHOMA, SPLEEN                                                                | 20047 | MANTLE CELL LYMPHOMA, SPLEEN                                                                |
| C8318 | MANTLE CELL LYMPHOMA, LYMPH NODES OF MULTIPLE SITE                                          | 20048 | MANTLE CELL LYMPHOMA, LYMPH NODES MULTIPLE SITES                                            |
| C8339 | DIFFUSE LARGE B-CELL LYMPHOMA, EXTRANODAL AND SOLID ORGAN SITES                             | 20050 | PRIMARY CENTRAL NERVOUS SYSTEM LYMPHOMA, UNSPECIFIED SITE, EXTRANODAL AND SOLID ORGAN SITES |
| C8331 | DIFFUSE LARGE B-CELL LYMPHOMA, LYMPH NODES OF HEAD, FACE, AND NECK                          | 20051 | PRIMARY CENTRAL NERVOUS SYSTEM LYMPHOMA, LYMPH NODES OF HEAD, FACE, AND NECK                |
| C8332 | DIFFUSE LARGE B-CELL LYMPHOMA, INTRATHORACIC LYMPH NODES                                    | 20052 | PRIMARY CENTRAL NERVOUS SYSTEM LYMPHOMA, INTRATHORACIC LYMPH NODES                          |
| C8333 | DIFFUSE LARGE B-CELL LYMPHOMA, INTRA-ABDOMINAL LYMPH NODES                                  | 20053 | PRIMARY CENTRAL NERVOUS SYSTEM LYMPHOMA, INTRA-ABDOMINAL LYMPH NODES                        |
| C8334 | DIFFUSE LARGE B-CELL LYMPHOMA, LYMPH NODES OF AXILLA AND UPPER LIMB                         | 20054 | PRIMARY CENTRAL NERVOUS SYSTEM LYMPHOMA, LYMPH NODES OF AXILLA AND UPPER LIMB               |
| C8335 | DIFFUSE LARGE B-CELL LYMPHOMA, LYMPH NODES OF INGUINAL REGION AND LOWER LIMB                | 20055 | PRIMARY CENTRAL NERVOUS SYSTEM LYMPHOMA, LYMPH NODES OF INGUINAL REGION AND LOWER LIMB      |
| C8336 | DIFFUSE LARGE B-CELL LYMPHOMA, INTRAPELVIC LYMPH NODES                                      | 20056 | PRIMARY CENTRAL NERVOUS SYSTEM LYMPHOMA, INTRAPELVIC LYMPH NODES                            |
| C8337 | DIFFUSE LARGE B-CELL LYMPHOMA, SPLEEN                                                       | 20057 | PRIMARY CENTRAL NERVOUS SYSTEM LYMPHOMA, SPLEEN                                             |
| C8338 | DIFFUSE LARGE B-CELL LYMPHOMA, LYMPH NODES OF MULTIPLE SITES                                | 20058 | PRIMARY CENTRAL NERVOUS SYSTEM LYMPHOMA, LYMPH NODES OF MULTIPLE SITES                      |
| C8479 | ANAPLASTIC LARGE CELL LYMPHOMA, ALK-NEGATIVE, EXTRANODAL AND SOLID ORGAN SITES              | 20060 | ANAPLASTIC LARGE CELL LYMPHOMA, UNSPECIFIED SITE, EXTRANODAL AND SOLID ORGAN SITES          |
| C8471 | ANAPLASTIC LARGE CELL LYMPHOMA, ALK-NEGATIVE, LYMPH NODES OF HEAD, FACE, AND NECK           | 20061 | ANAPLASTIC LARGE CELL LYMPHOMA, LYMPH NODES OF HEAD, FACE, AND NECK                         |
| C8472 | ANAPLASTIC LARGE CELL LYMPHOMA, ALK-NEGATIVE, INTRATHORACIC LYMPH NODES                     | 20062 | ANAPLASTIC LARGE CELL LYMPHOMA, INTRATHORACIC LYMPH NODES                                   |
| C8473 | ANAPLASTIC LARGE CELL LYMPHOMA, ALK-NEGATIVE, INTRA-ABDOMINAL LYMPH NODES                   | 20063 | ANAPLASTIC LARGE CELL LYMPHOMA, INTRA-ABDOMINAL LYMPH NODES                                 |
| C8474 | ANAPLASTIC LARGE CELL LYMPHOMA, ALK-NEGATIVE, LYMPH NODES OF AXILLA AND UPPER LIMB          | 20064 | ANAPLASTIC LARGE CELL LYMPHOMA, LYMPH NODES OF AXILLA AND UPPER LIMB                        |
| C8475 | ANAPLASTIC LARGE CELL LYMPHOMA, ALK-NEGATIVE, LYMPH NODES OF INGUINAL REGION AND LOWER LIMB | 20065 | ANAPLASTIC LARGE CELL LYMPHOMA, LYMPH NODES OF INGUINAL REGION AND LOWER LIMB               |
| C8476 | ANAPLASTIC LARGE CELL LYMPHOMA, ALK-NEGATIVE, INTRAPELVIC LYMPH NODES                       | 20066 | ANAPLASTIC LARGE CELL LYMPHOMA, INTRAPELVIC LYMPH NODES                                     |
| C8477 | ANAPLASTIC LARGE CELL LYMPHOMA, ALK-NEGATIVE, SPLEEN                                        | 20067 | ANAPLASTIC LARGE CELL LYMPHOMA, SPLEEN                                                      |
| C8478 | ANAPLASTIC LARGE CELL LYMPHOMA, ALK-NEGATIVE, LYMPH NODES OF MULTIPLE SITES                 | 20068 | ANAPLASTIC LARGE CELL LYMPHOMA, LYMPH NODES OF MULTIPLE SITES                               |
| C8339 | DIFFUSE LARGE B-CELL LYMPHOMA, EXTRANODAL AND SOLID ORGAN SITES                             | 20070 | LARGE CELL LYMPHOMA, UNSPECIFIED SITE, EXTRANODAL AND SOLID ORGAN SITES                     |
| C8331 | DIFFUSE LARGE B-CELL LYMPHOMA, LYMPH NODES OF HEAD, FACE, AND NECK                          | 20071 | LARGE CELL LYMPHOMA, LYMPH NODES OF HEAD, FACE, AND NECK                                    |
| C8332 | DIFFUSE LARGE B-CELL LYMPHOMA, INTRATHORACIC LYMPH NODES                                    | 20072 | LARGE CELL LYMPHOMA, INTRATHORACIC LYMPH NODES                                              |
| C8333 | DIFFUSE LARGE B-CELL LYMPHOMA, INTRA-ABDOMINAL LYMPH NODES                                  | 20073 | LARGE CELL LYMPHOMA, INTRA-ABDOMINAL LYMPH NODES                                            |
| C8334 | DIFFUSE LARGE B-CELL LYMPHOMA, LYMPH NODES OF AXILLA AND UPPER LIMB                         | 20074 | LARGE CELL LYMPHOMA, LYMPH NODES OF AXILLA AND UPPER LIMB                                   |

|       |                                                                                 |       |                                                                    |
|-------|---------------------------------------------------------------------------------|-------|--------------------------------------------------------------------|
| C8335 | DIFFUSE LARGE B-CELL LYMPHOMA, LYMPH NODES OF INGUINAL REGION AND LOWER LIMB    | 20075 | LARGE CELL LYMPHOMA, LYMPH NODES OF INGUINAL REGION AND LOWER LIMB |
| C8336 | DIFFUSE LARGE B-CELL LYMPHOMA, INTRAPELVIC LYMPH NODES                          | 20076 | LARGE CELL LYMPHOMA, INTRAPELVIC LYMPH NODES                       |
| C8337 | DIFFUSE LARGE B-CELL LYMPHOMA, SPLEEN                                           | 20077 | LARGE CELL LYMPHOMA, SPLEEN                                        |
| C8338 | DIFFUSE LARGE B-CELL LYMPHOMA, LYMPH NODES OF MULTIPLE SITES                    | 20078 | LARGE CELL LYMPHOMA, LYMPH NODES OF MULTIPLE SITES                 |
| C838  | Other non-follicular lymphoma                                                   | 2008  | MIXED LYMPHOSARCOMA*                                               |
| C8380 | OTHER NON-FOLLICULAR LYMPHOMA, UNSPECIFIED SITE                                 | 20080 | OTH VARN UNSP XTRNDL ORG                                           |
| C8381 | OTHER NON-FOLLICULAR LYMPHOMA, LYMPH NODES OF HEAD, FACE, AND NECK              | 20081 | MIXED LYMPHOSARC HEAD                                              |
| C8382 | OTHER NON-FOLLICULAR LYMPHOMA, INTRATHORACIC LYMPH NODES                        | 20082 | MIXED LYMPHOSARC THORAX                                            |
| C8383 | OTHER NON-FOLLICULAR LYMPHOMA, INTRA-ABDOMINAL LYMPH NODES                      | 20083 | MIXED LYMPHOSARC ABDOM                                             |
| C8384 | OTHER NON-FOLLICULAR LYMPHOMA, LYMPH NODES OF AXILLA AND UPPER LIMB             | 20084 | MIXED LYMPHOSARC AXILLA                                            |
| C8385 | OTHER NON-FOLLICULAR LYMPHOMA, LYMPH NODES OF INGUINAL REGION AND LOWER LIMB    | 20085 | MIXED LYMPHOSARC INGUIN                                            |
| C8386 | OTHER NON-FOLLICULAR LYMPHOMA, INTRAPELVIC LYMPH NODES                          | 20086 | MIXED LYMPHOSARC PELVIC                                            |
| C8387 | OTHER NON-FOLLICULAR LYMPHOMA, SPLEEN                                           | 20087 | MIXED LYMPHOSARC SPLEEN                                            |
| C8388 | OTHER NON-FOLLICULAR LYMPHOMA, LYMPH NODES OF MULTIPLE SITES                    | 20088 | MIXED LYMPHOSARC MULT                                              |
| C81   | Hodgkin lymphoma                                                                | 201   | HODGKIN'S DISEASE*                                                 |
| C8170 | OTHER CLASSICAL HODGKIN LYMPHOMA, UNSPECIFIED SITE                              | 2010  | HODGKIN'S PARAGRANULOMA*                                           |
| C8179 | OTHER CLASSICAL HODGKIN LYMPHOMA, EXTRANODAL AND SOLID ORGAN SITES              | 20100 | HDGK PRG UNSP XTRNDL ORG                                           |
| C8171 | OTHER CLASSICAL HODGKIN LYMPHOMA, LYMPH NODES OF HEAD, FACE, AND NECK           | 20101 | HODGKINS PARAGRAN HEAD                                             |
| C8172 | OTHER CLASSICAL HODGKIN LYMPHOMA, INTRATHORACIC LYMPH NODES                     | 20102 | HODGKINS PARAGRAN THORAX                                           |
| C8173 | OTHER CLASSICAL HODGKIN LYMPHOMA, INTRA-ABDOMINAL LYMPH NODES                   | 20103 | HODGKINS PARAGRAN ABDOM                                            |
| C8174 | OTHER CLASSICAL HODGKIN LYMPHOMA, LYMPH NODES OF AXILLA AND UPPER LIMB          | 20104 | HODGKINS PARAGRAN AXILLA                                           |
| C8175 | OTHER CLASSICAL HODGKIN LYMPHOMA, LYMPH NODES OF INGUINAL REGION AND LOWER LIMB | 20105 | HODGKINS PARAGRAN INGUIN                                           |
| C8176 | OTHER CLASSICAL HODGKIN LYMPHOMA, INTRAPELVIC LYMPH NODES                       | 20106 | HODGKINS PARAGRAN PELVIC                                           |
| C8177 | OTHER CLASSICAL HODGKIN LYMPHOMA, SPLEEN                                        | 20107 | HODGKINS PARAGRAN SPLEEN                                           |
| C8178 | OTHER CLASSICAL HODGKIN LYMPHOMA, LYMPH NODES OF MULTIPLE SITES                 | 20108 | HODGKINS PARAGRAN MULT                                             |
| C817  | Other Hodgkin lymphoma                                                          | 2011  | HODGKIN'S GRANULOMA*                                               |
| C8179 | OTHER CLASSICAL HODGKIN LYMPHOMA, EXTRANODAL AND SOLID ORGAN SITES              | 20110 | HDGK GRN UNSP XTRNDL ORG                                           |
| C8171 | OTHER CLASSICAL HODGKIN LYMPHOMA, LYMPH NODES OF HEAD, FACE, AND NECK           | 20111 | HODGKINS GRANULOM HEAD                                             |
| C8172 | OTHER CLASSICAL HODGKIN LYMPHOMA, INTRATHORACIC LYMPH NODES                     | 20112 | HODGKINS GRANULOM THORAX                                           |
| C8173 | OTHER CLASSICAL HODGKIN LYMPHOMA, INTRA-ABDOMINAL LYMPH NODES                   | 20113 | HODGKINS GRANULOM ABDOM                                            |
| C8174 | OTHER CLASSICAL HODGKIN LYMPHOMA, LYMPH NODES OF AXILLA AND UPPER LIMB          | 20114 | HODGKINS GRANULOM AXILLA                                           |
| C8175 | OTHER CLASSICAL HODGKIN LYMPHOMA, LYMPH NODES OF INGUINAL REGION AND LOWER LIMB | 20115 | HODGKINS GRANULOM INGUIN                                           |
| C8176 | OTHER CLASSICAL HODGKIN LYMPHOMA, INTRAPELVIC LYMPH NODES                       | 20116 | HODGKINS GRANULOM PELVIC                                           |
| C8177 | OTHER CLASSICAL HODGKIN LYMPHOMA, SPLEEN                                        | 20117 | HODGKINS GRANULOM SPLEEN                                           |
| C8178 | OTHER CLASSICAL HODGKIN LYMPHOMA, LYMPH NODES OF MULTIPLE SITES                 | 20118 | HODGKINS GRANULOM MULT                                             |
| C817  | Other Hodgkin lymphoma                                                          | 2012  | HODGKIN'S SARCOMA*                                                 |
| C8179 | OTHER CLASSICAL HODGKIN LYMPHOMA, EXTRANODAL AND SOLID ORGAN SITES              | 20120 | HDGK SRC UNSP XTRNDL ORG                                           |
| C8171 | OTHER CLASSICAL HODGKIN LYMPHOMA, LYMPH NODES OF HEAD, FACE, AND NECK           | 20121 | HODGKINS SARCOMA HEAD                                              |
| C8172 | OTHER CLASSICAL HODGKIN LYMPHOMA, INTRATHORACIC LYMPH NODES                     | 20122 | HODGKINS SARCOMA THORAX                                            |
| C8173 | OTHER CLASSICAL HODGKIN LYMPHOMA, INTRA-ABDOMINAL LYMPH NODES                   | 20123 | HODGKINS SARCOMA ABDOM                                             |
| C8174 | OTHER CLASSICAL HODGKIN LYMPHOMA, LYMPH NODES OF AXILLA AND UPPER LIMB          | 20124 | HODGKINS SARCOMA AXILLA                                            |
| C8175 | OTHER CLASSICAL HODGKIN LYMPHOMA, LYMPH NODES OF INGUINAL REGION AND LOWER LIMB | 20125 | HODGKINS SARCOMA INGUIN                                            |



|       |                                                                                                |       |                           |
|-------|------------------------------------------------------------------------------------------------|-------|---------------------------|
| C8176 | OTHER CLASSICAL HODGKIN LYMPHOMA, INTRAPELVIC LYMPH NODES                                      | 20126 | HODGKINS SARCOMA PELVIC   |
| C8177 | OTHER CLASSICAL HODGKIN LYMPHOMA, SPLEEN                                                       | 20127 | HODGKINS SARCOMA SPLEEN   |
| C8178 | OTHER CLASSICAL HODGKIN LYMPHOMA, LYMPH NODES OF MULTIPLE SITES                                | 20128 | HODGKINS SARCOMA MULT     |
| C810  | Nodular lymphocyte predominant Hodgkin lymphoma                                                | 2014  | HODGKINS LYMPH-HISTIOCYT* |
| C8100 | NODULAR LYMPHOCYTE PREDOMINANT HODGKIN LYMPHOMA, UNSPECIFIED SITE                              | 20140 | LYM-HST UNSP XTRNDL ORGN  |
| C8101 | NODULAR LYMPHOCYTE PREDOMINANT HODGKIN LYMPHOMA, LYMPH NODES OF HEAD, FACE, AND NECK           | 20141 | HODG LYMPH-HISTIO HEAD    |
| C8102 | NODULAR LYMPHOCYTE PREDOMINANT HODGKIN LYMPHOMA, INTRATHORACIC LYMPH NODES                     | 20142 | HODG LYMPH-HISTIO THORAX  |
| C8103 | NODULAR LYMPHOCYTE PREDOMINANT HODGKIN LYMPHOMA, INTRA-ABDOMINAL LYMPH NODES                   | 20143 | HODG LYMPH-HISTIO ABDOM   |
| C8104 | NODULAR LYMPHOCYTE PREDOMINANT HODGKIN LYMPHOMA, LYMPH NODES OF AXILLA AND UPPER LIMB          | 20144 | HODG LYMPH-HISTIO AXILLA  |
| C8105 | NODULAR LYMPHOCYTE PREDOMINANT HODGKIN LYMPHOMA, LYMPH NODES OF INGUINAL REGION AND LOWER LIMB | 20145 | HODG LYMPH-HISTIO INGUIN  |
| C8106 | NODULAR LYMPHOCYTE PREDOMINANT HODGKIN LYMPHOMA, INTRAPELVIC LYMPH NODES                       | 20146 | HODG LYMPH-HISTIO PELVIC  |
| C8107 | NODULAR LYMPHOCYTE PREDOMINANT HODGKIN LYMPHOMA, SPLEEN                                        | 20147 | HODG LYMPH-HISTIO SPLEEN  |
| C8108 | NODULAR LYMPHOCYTE PREDOMINANT HODGKIN LYMPHOMA, LYMPH NODES OF MULTIPLE SITES                 | 20148 | HODG LYMPH-HISTIO MULT    |
| C811  | Nodular sclerosis Hodgkin lymphoma                                                             | 2015  | HODGKINS NODULAR SCLEROS* |
| C8110 | NODULAR SCLEROSIS CLASSICAL HODGKIN LYMPHOMA, UNSPECIFIED SITE                                 | 20150 | NDR SCLR UNSP XTRNDL ORG  |
| C8111 | NODULAR SCLEROSIS CLASSICAL HODGKIN LYMPHOMA, LYMPH NODES OF HEAD, FACE, AND NECK              | 20151 | HODG NODUL SCLERO HEAD    |
| C8112 | NODULAR SCLEROSIS CLASSICAL HODGKIN LYMPHOMA, INTRATHORACIC LYMPH NODES                        | 20152 | HODG NODUL SCLERO THORAX  |
| C8113 | NODULAR SCLEROSIS CLASSICAL HODGKIN LYMPHOMA, INTRA-ABDOMINAL LYMPH NODES                      | 20153 | HODG NODUL SCLERO ABDOM   |
| C8114 | NODULAR SCLEROSIS CLASSICAL HODGKIN LYMPHOMA, LYMPH NODES OF AXILLA AND UPPER LIMB             | 20154 | HODG NODUL SCLERO AXILLA  |
| C8115 | NODULAR SCLEROSIS CLASSICAL HODGKIN LYMPHOMA, LYMPH NODES OF INGUINAL REGION AND LOWER LIMB    | 20155 | HODG NODUL SCLERO INGUIN  |
| C8116 | NODULAR SCLEROSIS CLASSICAL HODGKIN LYMPHOMA, INTRAPELVIC LYMPH NODES                          | 20156 | HODG NODUL SCLERO PELVIC  |
| C8117 | NODULAR SCLEROSIS CLASSICAL HODGKIN LYMPHOMA, SPLEEN                                           | 20157 | HODG NODUL SCLERO SPLEEN  |
| C8118 | NODULAR SCLEROSIS CLASSICAL HODGKIN LYMPHOMA, LYMPH NODES OF MULTIPLE SITES                    | 20158 | HODG NODUL SCLERO MULT    |
| C812  | Mixed cellularity Hodgkin lymphoma                                                             | 2016  | HODGKINS MIX CELLULARITY* |
| C8120 | MIXED CELLULARITY CLASSICAL HODGKIN LYMPHOMA, UNSPECIFIED SITE                                 | 20160 | MXD CELR UNSP XTRNDL ORG  |
| C8121 | MIXED CELLULARITY CLASSICAL HODGKIN LYMPHOMA, LYMPH NODES OF HEAD, FACE, AND NECK              | 20161 | HODGKINS MIX CELL HEAD    |
| C8122 | MIXED CELLULARITY CLASSICAL HODGKIN LYMPHOMA, INTRATHORACIC LYMPH NODES                        | 20162 | HODGKINS MIX CELL THORAX  |
| C8123 | MIXED CELLULARITY CLASSICAL HODGKIN LYMPHOMA, INTRA-ABDOMINAL LYMPH NODES                      | 20163 | HODGKINS MIX CELL ABDOM   |
| C8124 | MIXED CELLULARITY CLASSICAL HODGKIN LYMPHOMA, LYMPH NODES OF AXILLA AND UPPER LIMB             | 20164 | HODGKINS MIX CELL AXILLA  |
| C8125 | MIXED CELLULARITY CLASSICAL HODGKIN LYMPHOMA, LYMPH NODES OF INGUINAL REGION AND LOWER LIMB    | 20165 | HODGKINS MIX CELL INGUIN  |
| C8126 | MIXED CELLULARITY CLASSICAL HODGKIN LYMPHOMA, INTRAPELVIC LYMPH NODES                          | 20166 | HODGKINS MIX CELL PELVIC  |
| C8127 | MIXED CELLULARITY CLASSICAL HODGKIN LYMPHOMA, SPLEEN                                           | 20167 | HODGKINS MIX CELL SPLEEN  |
| C8128 | MIXED CELLULARITY CLASSICAL HODGKIN LYMPHOMA, LYMPH NODES OF MULTIPLE SITES                    | 20168 | HODGKINS MIX CELL MULT    |
| C813  | Lymphocyte depleted Hodgkin lymphoma                                                           | 2017  | HODG LYMPHOCYTIC DEPLET*  |
| C8130 | LYMPHOCYTE DEPLETED CLASSICAL HODGKIN LYMPHOMA, UNSPECIFIED SITE                               | 20170 | LYM DPLT UNSP XTRNDL ORG  |
| C8131 | LYMPHOCYTE DEPLETED CLASSICAL HODGKIN LYMPHOMA, LYMPH NODES OF HEAD, FACE, AND NECK            | 20171 | HODG LYMPH DEPLET HEAD    |
| C8132 | LYMPHOCYTE DEPLETED CLASSICAL HODGKIN LYMPHOMA, INTRATHORACIC LYMPH NODES                      | 20172 | HODG LYMPH DEPLET THORAX  |
| C8133 | LYMPHOCYTE DEPLETED CLASSICAL HODGKIN LYMPHOMA, INTRA-ABDOMINAL LYMPH NODES                    | 20173 | HODG LYMPH DEPLET ABDOM   |
| C8134 | LYMPHOCYTE DEPLETED CLASSICAL HODGKIN LYMPHOMA, LYMPH NODES OF AXILLA AND UPPER LIMB           | 20174 | HODG LYMPH DEPLET AXILLA  |

|       |                                                                                               |       |                          |
|-------|-----------------------------------------------------------------------------------------------|-------|--------------------------|
| C8135 | LYMPHOCYTE DEPLETED CLASSICAL HODGKIN LYMPHOMA, LYMPH NODES OF INGUINAL REGION AND LOWER LIMB | 20175 | HODG LYMPH DEPLET INGUIN |
| C8136 | LYMPHOCYTE DEPLETED CLASSICAL HODGKIN LYMPHOMA, INTRAPELVIC LYMPH NODES                       | 20176 | HODG LYMPH DEPLET PELVIC |
| C8137 | LYMPHOCYTE DEPLETED CLASSICAL HODGKIN LYMPHOMA, SPLEEN                                        | 20177 | HODG LYMPH DEPLET SPLEEN |
| C8138 | LYMPHOCYTE DEPLETED CLASSICAL HODGKIN LYMPHOMA, LYMPH NODES OF MULTIPLE SITES                 | 20178 | HODG LYMPH DEPLET MULT   |
| C819  | Hodgkin lymphoma, unspecified                                                                 | 2019  | HODGKINS DISEASE NOS*    |
| C8190 | HODGKIN LYMPHOMA, UNSPECIFIED, UNSPECIFIED SITE                                               | 20190 | HDGK DIS UNSP XTRNDL ORG |
| C8191 | HODGKIN LYMPHOMA, UNSPECIFIED, LYMPH NODES OF HEAD, FACE, AND NECK                            | 20191 | HODGKINS DIS NOS HEAD    |
| C8192 | HODGKIN LYMPHOMA, UNSPECIFIED, INTRATHORACIC LYMPH NODES                                      | 20192 | HODGKINS DIS NOS THORAX  |
| C8193 | HODGKIN LYMPHOMA, UNSPECIFIED, INTRA-ABDOMINAL LYMPH NODES                                    | 20193 | HODGKINS DIS NOS ABDOM   |
| C8194 | HODGKIN LYMPHOMA, UNSPECIFIED, LYMPH NODES OF AXILLA AND UPPER LIMB                           | 20194 | HODGKINS DIS NOS AXILLA  |
| C8195 | HODGKIN LYMPHOMA, UNSPECIFIED, LYMPH NODES OF INGUINAL REGION AND LOWER LIMB                  | 20195 | HODGKINS DIS NOS INGUIN  |
| C8196 | HODGKIN LYMPHOMA, UNSPECIFIED, INTRAPELVIC LYMPH NODES                                        | 20196 | HODGKINS DIS NOS PELVIC  |
| C8197 | HODGKIN LYMPHOMA, UNSPECIFIED, SPLEEN                                                         | 20197 | HODGKINS DIS NOS SPLEEN  |
| C8198 | HODGKIN LYMPHOMA, UNSPECIFIED, LYMPH NODES OF MULTIPLE SITES                                  | 20198 | HODGKINS DIS NOS MULT    |
| C8290 | FOLLICULAR LYMPHOMA, UNSPECIFIED, UNSPECIFIED SITE                                            | 20200 | NDLR LYM UNSP XTRNDL ORG |
| C8291 | FOLLICULAR LYMPHOMA, UNSPECIFIED, LYMPH NODES OF HEAD, FACE, AND NECK                         | 20201 | NODULAR LYMPHOMA HEAD    |
| C8292 | FOLLICULAR LYMPHOMA, UNSPECIFIED, INTRATHORACIC LYMPH NODES                                   | 20202 | NODULAR LYMPHOMA THORAX  |
| C8293 | FOLLICULAR LYMPHOMA, UNSPECIFIED, INTRA-ABDOMINAL LYMPH NODES                                 | 20203 | NODULAR LYMPHOMA ABDOM   |
| C8294 | FOLLICULAR LYMPHOMA, UNSPECIFIED, LYMPH NODES OF AXILLA AND UPPER LIMB                        | 20204 | NODULAR LYMPHOMA AXILLA  |
| C8295 | FOLLICULAR LYMPHOMA, UNSPECIFIED, LYMPH NODES OF INGUINAL REGION AND LOWER LIMB               | 20205 | NODULAR LYMPHOMA INGUIN  |
| C8296 | FOLLICULAR LYMPHOMA, UNSPECIFIED, INTRAPELVIC LYMPH NODES                                     | 20206 | NODULAR LYMPHOMA PELVIC  |
| C8297 | FOLLICULAR LYMPHOMA, UNSPECIFIED, SPLEEN                                                      | 20207 | NODULAR LYMPHOMA SPLEEN  |
| C8298 | FOLLICULAR LYMPHOMA, UNSPECIFIED, LYMPH NODES OF MULTIPLE SITES                               | 20208 | NODULAR LYMPHOMA MULT    |
| C840  | MYCOSIS FUNGOIDES                                                                             | 2021  | MYCOSIS FUNGOIDES*       |
| C8409 | MYCOSIS FUNGOIDES, EXTRANODAL AND SOLID ORGAN SITES                                           | 20210 | MYCS FNG UNSP XTRNDL ORG |
| C8401 | MYCOSIS FUNGOIDES, LYMPH NODES OF HEAD, FACE, AND NECK                                        | 20211 | MYCOSIS FUNGOIDES HEAD   |
| C8401 | MYCOSIS FUNGOIDES, INTRATHORACIC LYMPH NODES                                                  | 20212 | MYCOSIS FUNGOIDES THORAX |
| C8403 | MYCOSIS FUNGOIDES, INTRA-ABDOMINAL LYMPH NODES                                                | 20213 | MYCOSIS FUNGOIDES ABDOM  |
| C8404 | MYCOSIS FUNGOIDES, LYMPH NODES OF AXILLA AND UPPER LIMB                                       | 20214 | MYCOSIS FUNGOIDES AXILLA |
| C8405 | MYCOSIS FUNGOIDES, LYMPH NODES OF INGUINAL REGION AND LOWER LIMB                              | 20215 | MYCOSIS FUNGOIDES INGUIN |
| C8406 | MYCOSIS FUNGOIDES, INTRAPELVIC LYMPH NODES                                                    | 20216 | MYCOSIS FUNGOIDES PELVIC |
| C8407 | MYCOSIS FUNGOIDES, SPLEEN                                                                     | 20217 | MYCOSIS FUNGOIDES SPLEEN |
| C8408 | MYCOSIS FUNGOIDES, LYMPH NODES OF MULTIPLE SITES                                              | 20218 | MYCOSIS FUNGOIDES MULT   |
| C841  | Sézary disease                                                                                | 2022  | SEZARY'S DISEASE*        |
| C8419 | SEZARY DISEASE, EXTRANODAL AND SOLID ORGAN SITES                                              | 20220 | SZRY DIS UNSP XTRNDL ORG |
| C8411 | SEZARY DISEASE, LYMPH NODES OF HEAD, FACE, AND NECK                                           | 20221 | SEZARY'S DISEASE HEAD    |
| C8412 | SEZARY DISEASE, INTRATHORACIC LYMPH NODES                                                     | 20222 | SEZARY'S DISEASE THORAX  |
| C8413 | SEZARY DISEASE, INTRA-ABDOMINAL LYMPH NODES                                                   | 20223 | SEZARY'S DISEASE ABDOM   |
| C8414 | SEZARY DISEASE, LYMPH NODES OF AXILLA AND UPPER LIMB                                          | 20224 | SEZARY'S DISEASE AXILLA  |
| C8415 | SEZARY DISEASE, LYMPH NODES OF INGUINAL REGION AND LOWER LIMB                                 | 20225 | SEZARY'S DISEASE INGUIN  |
| C8416 | SEZARY DISEASE, INTRAPELVIC LYMPH NODES                                                       | 20226 | SEZARY'S DISEASE PELVIC  |
| C8417 | SEZARY DISEASE, SPLEEN                                                                        | 20227 | SEZARY'S DISEASE SPLEEN  |
| C8418 | SEZARY DISEASE, LYMPH NODES OF MULTIPLE SITES                                                 | 20228 | SEZARY'S DISEASE MULT    |

|       |                                                                                         |       |                                            |
|-------|-----------------------------------------------------------------------------------------|-------|--------------------------------------------|
| C96   | Other and unspecified malignant neoplasms of lymphoid, hematopoietic and related tissue | 2023  | MALIGNANT HISTIOCYTOSIS*                   |
| C96A  | HISTIOCYTIC SARCOMA                                                                     | 20230 | MLG HIST UNSP XTRNDL ORG                   |
| C96A  | HISTIOCYTIC SARCOMA                                                                     | 20231 | MAL HISTIOCYTOSIS HEAD                     |
| C96A  | HISTIOCYTIC SARCOMA                                                                     | 20232 | MAL HISTIOCYTOSIS THORAX                   |
| C96A  | HISTIOCYTIC SARCOMA                                                                     | 20233 | MAL HISTIOCYTOSIS ABDOM                    |
| C96A  | HISTIOCYTIC SARCOMA                                                                     | 20234 | MAL HISTIOCYTOSIS AXILLA                   |
| C96A  | HISTIOCYTIC SARCOMA                                                                     | 20235 | MAL HISTIOCYTOSIS INGUIN                   |
| C96A  | HISTIOCYTIC SARCOMA                                                                     | 20236 | MAL HISTIOCYTOSIS PELVIC                   |
| C96A  | HISTIOCYTIC SARCOMA                                                                     | 20237 | MAL HISTIOCYTOSIS SPLEEN                   |
| C96A  | HISTIOCYTIC SARCOMA                                                                     | 20238 | MAL HISTIOCYTOSIS MULT                     |
| C914  | Hairy cell leukemia                                                                     | 2024  | LEUKEM RETICULOENDOTHEL*                   |
| C9140 | Hairy cell leukemia not having achieved remission                                       | 20240 | LK RTCTL UNSP XTRNDL ORG                   |
| C9140 | Hairy cell leukemia not having achieved remission                                       | 20241 | HAIRY-CELL LEUKEM HEAD                     |
| C9140 | Hairy cell leukemia not having achieved remission                                       | 20242 | HAIRY-CELL LEUKEM THORAX                   |
| C9140 | Hairy cell leukemia not having achieved remission                                       | 20243 | HAIRY-CELL LEUKEM ABDOM                    |
| C9140 | Hairy cell leukemia not having achieved remission                                       | 20244 | HAIRY-CELL LEUKEM AXILLA                   |
| C9140 | Hairy cell leukemia not having achieved remission                                       | 20245 | HAIRY-CELL LEUKEM INGUIN                   |
| C9140 | Hairy cell leukemia not having achieved remission                                       | 20246 | HAIRY-CELL LEUKEM PELVIC                   |
| C9140 | Hairy cell leukemia not having achieved remission                                       | 20247 | HAIRY-CELL LEUKEM SPLEEN                   |
| C9140 | Hairy cell leukemia not having achieved remission                                       | 20248 | HAIRY-CELL LEUKEM MULT                     |
| C960  | MULTIFOCAL AND MULTISYSTEMIC (DISSEMINATED) LANGERHANS-CELL HISTIOCYTOSIS               | 2025  | LETTERER-SIWE DISEASE*                     |
| C960  | MULTIFOCAL AND MULTISYSTEMIC (DISSEMINATED) LANGERHANS-CELL HISTIOCYTOSIS               | 20250 | LTR-SIWE UNSP XTRNDL ORG                   |
| C960  | MULTIFOCAL AND MULTISYSTEMIC (DISSEMINATED) LANGERHANS-CELL HISTIOCYTOSIS               | 20251 | LETTERER-SIWE DIS HEAD                     |
| C960  | MULTIFOCAL AND MULTISYSTEMIC (DISSEMINATED) LANGERHANS-CELL HISTIOCYTOSIS               | 20252 | LETTERER-SIWE DIS THORAX                   |
| C960  | MULTIFOCAL AND MULTISYSTEMIC (DISSEMINATED) LANGERHANS-CELL HISTIOCYTOSIS               | 20253 | LETTERER-SIWE DIS ABDOM                    |
| C960  | MULTIFOCAL AND MULTISYSTEMIC (DISSEMINATED) LANGERHANS-CELL HISTIOCYTOSIS               | 20254 | LETTERER-SIWE DIS AXILLA                   |
| C960  | MULTIFOCAL AND MULTISYSTEMIC (DISSEMINATED) LANGERHANS-CELL HISTIOCYTOSIS               | 20255 | LETTERER-SIWE DIS INGUIN                   |
| C960  | MULTIFOCAL AND MULTISYSTEMIC (DISSEMINATED) LANGERHANS-CELL HISTIOCYTOSIS               | 20256 | LETTERER-SIWE DIS PELVIC                   |
| C960  | MULTIFOCAL AND MULTISYSTEMIC (DISSEMINATED) LANGERHANS-CELL HISTIOCYTOSIS               | 20257 | LETTERER-SIWE DIS SPLEEN                   |
| C960  | MULTIFOCAL AND MULTISYSTEMIC (DISSEMINATED) LANGERHANS-CELL HISTIOCYTOSIS               | 20258 | LETTERER-SIWE DIS MULT                     |
| C962  | MALIGNANT MAST CELL TUMOR                                                               | 2026  | MALIG MAST CELL TUMORS*                    |
| C962  | MALIGNANT MAST CELL TUMOR                                                               | 20260 | MLG MAST UNSP XTRNDL ORG                   |
| C962  | MALIGNANT MAST CELL TUMOR                                                               | 20261 | MAL MASTOCYTOSIS HEAD                      |
| C962  | MALIGNANT MAST CELL TUMOR                                                               | 20262 | MAL MASTOCYTOSIS THORAX                    |
| C962  | MALIGNANT MAST CELL TUMOR                                                               | 20263 | MAL MASTOCYTOSIS ABDOM                     |
| C962  | MALIGNANT MAST CELL TUMOR                                                               | 20264 | MAL MASTOCYTOSIS AXILLA                    |
| C962  | MALIGNANT MAST CELL TUMOR                                                               | 20265 | MAL MASTOCYTOSIS INGUIN                    |
| C962  | MALIGNANT MAST CELL TUMOR                                                               | 20266 | MAL MASTOCYTOSIS PELVIC                    |
| C962  | MALIGNANT MAST CELL TUMOR                                                               | 20267 | MAL MASTOCYTOSIS SPLEEN                    |
| C962  | MALIGNANT MAST CELL TUMOR                                                               | 20268 | MAL MASTOCYTOSIS MULT                      |
| C858  | Other specified types of non-Hodgkin lymphoma                                           | 2028  | LYMPHOMAS NEC*                             |
| C8580 | OTHER MALIGNANT LYMPHOMAS UNSPECIFIED SITE                                              | 20280 | OTHER MALIGNANT LYMPHOMAS UNSPECIFIED SITE |
| C8581 | OTHER SPECIFIED TYPES OF NON-HODGKIN LYMPHOMA, LYMPH NODES OF HEAD, FACE, AND NECK      | 20281 | LYMPHOMAS NEC HEAD                         |

|       |                                                                                             |       |                                     |
|-------|---------------------------------------------------------------------------------------------|-------|-------------------------------------|
| C8582 | OTHER SPECIFIED TYPES OF NON-HODGKIN LYMPHOMA, INTRATHORACIC LYMPH NODES                    | 20282 | LYMPHOMAS NEC THORAX                |
| C8583 | OTHER SPECIFIED TYPES OF NON-HODGKIN LYMPHOMA, INTRA-ABDOMINAL LYMPH NODES                  | 20283 | LYMPHOMAS NEC ABDOM                 |
| C8584 | OTHER MALIGNANT LYMPHOMAS INVOLVING LYMPH NODES OF AXILLA AND UPPER LIMB                    | 20284 | LYMPHOMAS NEC AXILLA                |
| C8585 | OTHER MALIGNANT LYMPHOMAS INVOLVING LYMPH NODES OF INGUINAL REGION AND LOWER LIMB           | 20285 | LYMPHOMAS NEC INGUIN                |
| C8586 | OTHER MALIGNANT LYMPHOMAS INVOLVING INTRAPELVIC LYMPH NODES                                 | 20286 | LYMPHOMAS NEC PELVIC                |
| C8587 | OTHER MALIGNANT LYMPHOMAS INVOLVING SPLEEN                                                  | 20287 | LYMPHOMAS NEC SPLEEN                |
| C8588 | OTHER MALIGNANT LYMPHOMAS INVOLVING LYMPH NODES OF MULTIPLE SITES                           | 20288 | LYMPHOMAS NEC MULT                  |
| C96   | Other and unspecified malignant neoplasms of lymphoid, hematopoietic and related tissue     | 2029  | MAL NEO LYM/HIST TIS NEC*           |
| C969  | MALIGNANT NEOPLASM OF LYMPHOID, HEMATOPOIETIC AND RELATED TISSUE, UNSPECIFIED               | 20290 | UNSP LYM UNSP XTRNDL ORG            |
| C969  | MALIGNANT NEOPLASM OF LYMPHOID, HEMATOPOIETIC AND RELATED TISSUE, UNSPECIFIED               | 20291 | LYMPHOID MAL NEC HEAD               |
| C969  | MALIGNANT NEOPLASM OF LYMPHOID, HEMATOPOIETIC AND RELATED TISSUE, UNSPECIFIED               | 20292 | LYMPHOID MAL NEC THORAX             |
| C969  | MALIGNANT NEOPLASM OF LYMPHOID, HEMATOPOIETIC AND RELATED TISSUE, UNSPECIFIED               | 20293 | LYMPHOID MAL NEC ABDOM              |
| C969  | MALIGNANT NEOPLASM OF LYMPHOID, HEMATOPOIETIC AND RELATED TISSUE, UNSPECIFIED               | 20294 | LYMPHOID MAL NEC AXILLA             |
| C969  | MALIGNANT NEOPLASM OF LYMPHOID, HEMATOPOIETIC AND RELATED TISSUE, UNSPECIFIED               | 20295 | LYMPHOID MAL NEC INGUIN             |
| C969  | MALIGNANT NEOPLASM OF LYMPHOID, HEMATOPOIETIC AND RELATED TISSUE, UNSPECIFIED               | 20296 | LYMPHOID MAL NEC PELVIC             |
| C969  | MALIGNANT NEOPLASM OF LYMPHOID, HEMATOPOIETIC AND RELATED TISSUE, UNSPECIFIED               | 20297 | LYMPHOID MAL NEC SPLEEN             |
| C969  | MALIGNANT NEOPLASM OF LYMPHOID, HEMATOPOIETIC AND RELATED TISSUE, UNSPECIFIED               | 20298 | LYMPHOID MAL NEC MULT               |
| C90   | Multiple myeloma and malignant plasma cell neoplasms                                        | 203   | MULTIPLE MYELOMA ET AL*             |
| C900  | Multiple myeloma                                                                            | 2030  | MULTIPLE MYELOMA*                   |
| C9000 | MULTIPLE MYELOMA NOT HAVING ACHIEVED REMISSION                                              | 20300 | MULT MYELM W/O REMISSION            |
| C9001 | MULTIPLE MYELOMA IN REMISSION                                                               | 20301 | MULT MYELM W REMISSION              |
| C901  | Plasma cell leukemia                                                                        | 2031  | PLASMA CELL LEUKEMIA*               |
| C9010 | PLASMA CELL LEUKEMIA NOT HAVING ACHIEVED REMISSION                                          | 20310 | PLSM CELL LEUK W/O RMSON            |
| C9011 | PLASMA CELL LEUKEMIA IN REMISSION                                                           | 20311 | PLSM CELL LEUK W RMSON              |
| C833  |                                                                                             | 2038  | IMMUNOPROLIFERAT NEO NEC*           |
| C8330 |                                                                                             | 20380 | OTH IMNPRFL NPL W/O RMSN            |
| C8331 |                                                                                             | 20381 | OTH IMNPRFL NPL W RMSN              |
| C91   | Lymphoid leukemia                                                                           | 204   | LYMPHOID LEUKEMIA*                  |
| C910  | Acute lymphoblastic leukemia                                                                | 2040  | ACUTE LYMPHOID LEUKEMIA*            |
| C9100 | LYMPHOID LEUKEMIA ACUTE WITHOUT MENTION OF HAVING ACHIEVED REMISSION                        | 20400 | ACT LYM LEUK W/O RMSION             |
| C9101 | ACUTE LYMPHOBLASTIC LEUKEMIA, IN REMISSION                                                  | 20401 | ACT LYM LEUK W RMSION               |
| C9102 | ACUTE LYMPHOBLASTIC LEUKEMIA, IN RELAPSE                                                    | 20402 |                                     |
| C911  | Chronic lymphocytic leukemia                                                                | 2041  | CHR LYMPHOID LEUKEMIA*              |
| C9110 | CHRONIC LYMPHOCYTIC LEUKEMIA OF B-CELL TYPE NOT HAVING ACHIEVED REMISSION                   | 20410 | CHR LYM LEUK W/O RMSION             |
| C9111 | CHRONIC LYMPHOCYTIC LEUKEMIA OF B-CELL TYPE IN REMISSION                                    | 20411 | CHR LYM LEUK W RMSION               |
| C91Z  | Subacute lymphocytic leukemia                                                               | 2042  | SUBAC LYMPHOID LEUKEMIA*            |
| C91Z0 | LYMPHOID LEUKEMIA, SUBACUTE, WITHOUT MENTION OF HAVING ACHIEVED REMISSION, FAILED REMISSION | 20420 | SBAC LYM LEUK W/O RMSION            |
| C91Z1 | LYMPHOID LEUKEMIA SUBACUTE IN REMISSION                                                     | 20421 | SBAC LYM LEUK W RMSION              |
| C917  | Other lymphoid leukemia                                                                     | 2048  | LYMPHOID LEUKEMIA NEC*              |
| C91Z0 | OTHER LYMPHOID LEUKEMIA NOT HAVING ACHIEVED REMISSION                                       | 20480 | OTH LYM LEUK W/O RMSION             |
| C91Z1 | OTHER LYMPHOID LEUKEMIA, IN REMISSION                                                       | 20481 | OTH LYM LEUK W RMSION               |
| C91Z2 | OTHER LYMPHOID LEUKEMIA, IN RELAPSE                                                         | 20482 | OTHER LYMPHOID LEUKEMIA, IN RELAPSE |
| C919  | Lymphoid Leukemia, unspecified                                                              | 2049  | LYMPHOID LEUKEMIA NOS*              |

|       |                                                                                    |       |                                            |
|-------|------------------------------------------------------------------------------------|-------|--------------------------------------------|
| C9190 | LYMPHOID LEUKEMIA, UNSPECIFIED NOT HAVING ACHIEVED REMISSION                       | 20490 | UNS LYM LEUK W/O RMSION                    |
| C9191 | LYMPHOID LEUKEMIA, UNSPECIFIED, IN REMISSION                                       | 20491 | UNS LYM LEUK W RMSION                      |
| C9192 | LYMPHOID LEUKEMIA, UNSPECIFIED, IN RELAPSE                                         | 20492 | UNSPECIFIED LYMPHOID LEUKEMIA, IN RELAPSE  |
| C92   | Myeloid Leukemia                                                                   | 205   | MYELOID LEUKEMIA*                          |
| C920  | ACUTE MYELOID LEUKEMIA                                                             | 2050  | ACUTE MYELOID LEUKEMIA*                    |
| C9200 | ACUTE MYELOBLASTIC LEUKEMIA, NOT HAVING ACHIEVED REMISSION                         | 20500 | ACT MYL LEUK W/O RMSION                    |
| C9201 | ACUTE MYELOBLASTIC LEUKEMIA, IN REMISSION                                          | 20501 | ACT MYL LEUK W RMSION                      |
| C9202 | ACUTE MYELOBLASTIC LEUKEMIA, IN RELAPSE                                            | 20502 | MYELOID LEUKEMIA, ACUTE, IN RELAPSE        |
| C921  | Chronic myeloid leukemia, BCR/ABL-positive                                         | 2051  | CHRONIC MYELOID LEUKEMIA*                  |
| C9210 | CHRONIC MYELOID LEUKEMIA, BCR/ABL-POSITIVE, NOT HAVING ACHIEVED REMISSION          | 20510 | CHR MYL LEUK W/O RMSION                    |
| C9211 | CHRONIC MYELOID LEUKEMIA, BCR/ABL-POSITIVE, IN REMISSION                           | 20511 | CHR MYL LEUK W RMSION                      |
| C9212 | CHRONIC MYELOID LEUKEMIA, BCR/ABL-POSITIVE, IN RELAPSE                             | 2052  | SUBACUT MYELOID LEUKEMIA*                  |
| C9220 | ATYPICAL CHRONIC MYELOID LEUKEMIA, BCR/ABL-NEGATIVE, NOT HAVING ACHIEVED REMISSION | 20520 | SBAC MYL LEUK W/O RMSION                   |
| C9221 | ATYPICAL CHRONIC MYELOID LEUKEMIA, BCR/ABL-NEGATIVE, IN REMISSION                  | 20521 | SBAC MYL LEUK W RMSION                     |
| C9222 | ATYPICAL CHRONIC MYELOID LEUKEMIA, BCR/ABL-NEGATIVE, IN RELAPSE                    | 20522 | MYELOID LEUKEMIA, SUBACUTE, IN RELAPSE     |
| C923  | Myeloid sarcoma                                                                    | 2053  | MYELOID SARCOMA*                           |
| C9230 | MYELOID SARCOMA, NOT HAVING ACHIEVED REMISSION                                     | 20530 | MYL SRCOMA W/O RMSION                      |
| C9231 | MYELOID SARCOMA, IN REMISSION                                                      | 20531 | MYL SRCOMA W RMSION                        |
| C929  | Myeloid leukemia, unspecified                                                      | 2058  | MYELOID LEUKEMIA NEC*                      |
| C92Z0 | OTHER MYELOID LEUKEMIA NOT HAVING ACHIEVED REMISSION                               | 20580 | OTH MYL LEUK W/O RMSION                    |
| C92Z1 | OTHER MYELOID LEUKEMIA, IN RELAPSE                                                 | 20581 | OTH MYL LEUK W RMSION                      |
| C92Z2 | OTHER MYELOID LEUKEMIA, IN RELAPSE                                                 | 20582 | OTHER MYELOID LEUKEMIA, IN RELAPSE         |
| C929  | Myeloid leukemia, unspecified                                                      | 2059  | MYELOID LEUKEMIA NOS*                      |
| C9290 | MYELOID LEUKEMIA, UNSPECIFIED, NOT HAVING ACHIEVED REMISSION                       | 20590 | UNS MYL LEUK W/O RMSION                    |
| C9291 | MYELOID LEUKEMIA, UNSPECIFIED IN REMISSION                                         | 20591 | UNS MYL LEUK W RMSION                      |
| C9292 | MYELOID LEUKEMIA, UNSPECIFIED IN RELAPSE                                           | 20592 | UNSPECIFIED MYELOID LEUKEMIA, IN RELAPSE   |
| C93   | MONOCYTIC LEUKEMIA                                                                 | 206   | MONOCYTIC LEUKEMIA*                        |
| C930  | ACUTE MONOCYTIC LEUKEMIA                                                           | 2060  | ACUTE MONOCYTIC LEUKEMIA*                  |
| C9300 | ACUTE MONOBLASTIC/MONOCYTIC LEUKEMIA, NOT HAVING ACHIEVED REMISSION                | 20600 | ACT MONO LEUK W/O RMSION                   |
| C9301 | ACUTE MONOBLASTIC/MONOCYTIC LEUKEMIA, IN REMISSION                                 | 20601 | ACT MONO LEUK W RMSION                     |
| C9302 | ACUTE MONOBLASTIC/MONOCYTIC LEUKEMIA, IN RELAPSE                                   | 20602 | MONOCYTIC LEUKEMIA, ACUTE, IN RELAPSE      |
| C931  | CHRONIC MYELOMONOCYTIC LEUKEMIA                                                    | 2061  | CHR MONOCYTIC LEUKEMIA*                    |
| C9310 | CHRONIC MYELOMONOCYTIC LEUKEMIA NOT HAVING ACHIEVED REMISSION                      | 20610 | CHR MONO LEUK W/O RMSION                   |
| C9311 | CHRONIC MYELOMONOCYTIC LEUKEMIA, IN REMISSION                                      | 20611 | CHR MONO LEUK W RMSION                     |
| C9312 | CHRONIC MYELOMONOCYTIC LEUKEMIA, IN RELAPSE                                        | 20612 | MONOCYTIC LEUKEMIA, CHRONIC, IN RELAPSE    |
| C932  | Subacute monocytic leukemia                                                        | 2062  | SUBAC MONOCYTIC LEUKEMIA*                  |
| C9390 | MONOCYTIC LEUKEMIA, UNSPECIFIED, NOT HAVING ACHIEVED REMISSION                     | 20620 | SBAC MONO LEUK W/O RMSION                  |
| C9391 | MONOCYTIC LEUKEMIA, UNSPECIFIED IN REMISSION                                       | 20621 | SBAC MONO LEUK W RMSION                    |
| C9392 | MONOCYTIC LEUKEMIA, UNSPECIFIED IN RELAPSE                                         | 20622 | MONOCYTIC LEUKEMIA, UNSPECIFIED IN RELAPSE |
| C929  | Myeloid leukemia, unspecified                                                      | 2068  | MONOCYTIC LEUKEMIA NEC*                    |
| C93Z0 | OTHER MONOCYTIC LEUKEMIA, NOT HAVING ACHIEVED REMISSION                            | 20680 | OTH MONO LEUK W/O RMSION                   |
| C93Z1 | OTHER MONOCYTIC LEUKEMIA, IN REMISSION                                             | 20681 | OTH MONO LEUK W RMSION                     |

|       |                                                                         |       |                                                         |
|-------|-------------------------------------------------------------------------|-------|---------------------------------------------------------|
| C93Z2 | OTHER MONOCYTIC LEUKEMIA, IN RELAPSE                                    | 20682 | OTHER MONOCYTIC LEUKEMIA, IN RELAPSE                    |
| C939  | MONOCYTIC LEUKEMIA, UNSPECIFIED                                         | 2069  | MONOCYTIC LEUKEMIA NOS*                                 |
| C9390 | MONOCYTIC LEUKEMIA, UNSPECIFIED, NOT HAVING ACHIEVED REMISSION          | 20690 | UNS MONO LEUK W/O RMSION                                |
| C9391 | MONOCYTIC LEUKEMIA, UNSPECIFIED IN REMISSION                            | 20691 | UNS MONO LEUK W RMSION                                  |
| C9392 | MONOCYTIC LEUKEMIA, UNSPECIFIED IN RELAPSE                              | 20692 | UNSPECIFIED MONOCYTIC LEUKEMIA, IN RELAPSE              |
| C94   | Other leukemia of specified cell type                                   | 207   | OTHER SPECIFIED LEUKEMIA*                               |
| C940  | Acute erythremia and erythroleukemia                                    | 2070  | ACUTE ERYTHREMIA*                                       |
| C9400 | ACUTE ERYTHROID LEUKEMIA, NOT HAVING ACHIEVED REMISSION                 | 20700 | ACT ERYTH/ERYLK W/O RMSON                               |
| C9401 | ACUTE ERYTHROID LEUKEMIA, IN REMISSION                                  | 20701 | ACT ERYTH/ERYLK W RMSON                                 |
| C9402 | ACUTE ERYTHROID LEUKEMIA, IN RELAPSE                                    | 20702 | ACUTE ERYTHREMIA AND ERYTHROLEUKEMIA, IN RELAPSE        |
| D45   | POLYCYTHEMIA VERA                                                       | 2071  | CHRONIC ERYTHREMIA*                                     |
| D45   | POLYCYTHEMIA VERA                                                       | 20710 | CHR ERYTHRM W/O REMISION                                |
| D45   | POLYCYTHEMIA VERA                                                       | 20711 | CHR ERYTHRM W REMISION                                  |
| D45   | POLYCYTHEMIA VERA                                                       | 20712 | CHRONIC ERYTHREMIA, IN RELAPSE                          |
| C942  | ACUTE MEGAKARYOBLASTIC LEUKEMIA                                         | 2072  | MEGAKARYOCYTIC LEUKEMIA*                                |
| C9420 | ACUTE MEGAKARYOBLASTIC LEUKEMIA NOT HAVING ACHIEVED REMISSION           | 20720 | MGKRYCYT LEUK W/O RMSION                                |
| C9421 | ACUTE MEGAKARYOBLASTIC LEUKEMIA, IN REMISSION                           | 20721 | MGKRYCYT LEUK W RMSION                                  |
| C9422 | ACUTE MEGAKARYOBLASTIC LEUKEMIA, IN RELAPSE                             | 20722 | MEGAKARYOCYTIC LEUKEMIA, IN RELAPSE                     |
| C948  | Other specified leukemias                                               | 2078  | SPECIFIED LEUKEMIA NEC*                                 |
| C9480 | OTHER SPECIFIED LEUKEMIAS NOT HAVING ACHIEVED REMISSION                 | 20780 | OTH SPF LEUK W/O REMSION                                |
| C9481 | OTHER SPECIFIED LEUKEMIAS, IN REMISSION                                 | 20781 | OTH SPF LEUK W REMSION                                  |
| C9482 | OTHER SPECIFIED LEUKEMIAS, IN RELAPSE                                   | 20782 | OTHER SPECIFIED LEUKEMIA, IN RELAPSE                    |
| C95   | LEUKEMIA OF UNSPECIFIED CELL TYPE                                       | 208   | LEUKEMIA-UNSPECIF CELL*                                 |
| C950  | ACUTE LEUKEMIA OF UNSPECIFIED CELL TYPE                                 | 2080  | ACT LEUK UNS CL W/O RMSN*                               |
| C9500 | ACUTE LEUKEMIA OF UNSPECIFIED CELL TYPE NOT HAVING ACHIEVED REMISSION   | 20800 | ACT LEUK UNS CL W/O RMSN                                |
| C9501 | ACUTE LEUKEMIA OF UNSPECIFIED CELL TYPE, IN REMISSION                   | 20801 | ACT LEUK UNS CL W RMSON                                 |
| C9502 | ACUTE LEUKEMIA OF UNSPECIFIED CELL TYPE, IN RELAPSE                     | 20802 | LEUKEMIA OF UNSPECIFIED CELL TYPE, ACUTE, IN RELAPSE    |
| C951  | CHRONIC LEUKEMIA OF UNSPECIFIED CELL TYPE                               | 2081  | CHRONIC LEUKEMIA NOS*                                   |
| C9510 | CHRONIC LEUKEMIA OF UNSPECIFIED CELL TYPE NOT HAVING ACHIEVED REMISSION | 20810 | CHR LEUK UNS CL W/O RMSN                                |
| C9511 | CHRONIC LEUKEMIA OF UNSPECIFIED CELL TYPE, IN REMISSION                 | 20811 | CHR LEUK UNS CL W RMSON                                 |
| C9512 | CHRONIC LEUKEMIA OF UNSPECIFIED CELL TYPE, IN RELAPSE                   | 20812 | LEUKEMIA OF UNSPECIFIED CELL TYPE, CHRONIC, IN RELAPSE  |
| C959  | LEUKEMIA, UNSPECIFIED                                                   | 2082  | SUBACUTE LEUKEMIA NOS*                                  |
| C9590 | LEUKEMIA, UNSPECIFIED NOT HAVING ACHIEVED REMISSION                     | 20820 | SBAC LEUK UNS CL W/O RMS                                |
| C9591 | LEUKEMIA OF UNSPECIFIED CELL TYPE SUBACUTE IN REMISSION                 | 20821 | SBAC LEUK UNS CL W RMSON                                |
| C9592 | LEUKEMIA OF UNSPECIFIED CELL TYPE, SUBACUTE, IN RELAPSE                 | 20822 | LEUKEMIA OF UNSPECIFIED CELL TYPE, SUBACUTE, IN RELAPSE |
| C959  | LEUKEMIA, UNSPECIFIED                                                   | 2088  | LEUKEMIA-UNSPEC CELL NEC*                               |
| C9590 | LEUKEMIA, UNSPECIFIED NOT HAVING ACHIEVED REMISSION                     | 20880 | OTH LEUK UNS CL W/O RMSN                                |
| C9591 | LEUKEMIA, UNSPECIFIED, IN REMISSION                                     | 20881 | OTH LEUK UNS CL W RMSON                                 |
| C9592 | LEUKEMIA, UNSPECIFIED, IN RELAPSE                                       | 20882 | OTHER LEUKEMIA OF UNSPECIFIED CELL TYPE, IN RELAPSE     |
| C959  | LEUKEMIA, UNSPECIFIED                                                   | 2089  | LEUKEMIA-UNSPEC CELL NOS*                               |

|       |                                                                           |       |                                                                                                    |
|-------|---------------------------------------------------------------------------|-------|----------------------------------------------------------------------------------------------------|
| C9590 | LEUKEMIA, UNSPECIFIED NOT HAVING ACHIEVED REMISSION                       | 20890 | LEUKEMIA NOS W/O REMSION                                                                           |
| C9591 | LEUKEMIA, UNSPECIFIED, IN REMISSION                                       | 20891 | LEUKEMIA NOS W REMISSION                                                                           |
| C9592 | LEUKEMIA, UNSPECIFIED, IN RELAPSE                                         | 20892 | UNSPECIFIED LEUKEMIA IN RELAPSE                                                                    |
| D00   | Carcinoma in situ of oral cavity, esophagus and stomach                   | 230   | CA IN SITU DIGESTIVE ORG*                                                                          |
| D000  | CARCINOMA IN SITU OF ORAL CAVITY, UNSPECIFIED SITE                        | 2300  | CA IN SITU ORAL CAV/PHAR                                                                           |
| D001  | CARCINOMA IN SITU OF ESOPHAGUS                                            | 2301  | CA IN SITU ESOPHAGUS                                                                               |
| D002  | CARCINOMA IN SITU OF STOMACH                                              | 2302  | CA IN SITU STOMACH                                                                                 |
| D010  | CARCINOMA IN SITU OF COLON                                                | 2303  | CA IN SITU COLON                                                                                   |
| D012  | CARCINOMA IN SITU OF RECTUM                                               | 2304  | CA IN SITU RECTUM                                                                                  |
| D013  | CARCINOMA IN SITU OF ANUS AND ANAL CANAL                                  | 2305  | CA IN SITU ANAL CANAL                                                                              |
| D013  | CARCINOMA IN SITU OF ANUS AND ANAL CANAL                                  | 2306  | CA IN SITU ANUS NOS                                                                                |
| D014  | CARCINOMA IN SITU OF OTHER AND UNSPECIFIED PARTS OF INTESTINE             | 2307  | CA IN SITU BOWEL NEC/NOS                                                                           |
| D015  | CARCINOMA IN SITU OF LIVER, GALLBLADDER AND BILE DUCTS                    | 2308  | CA IN SITU LIVER/BILIARY                                                                           |
| D019  | CARCINOMA IN SITU OF DIGESTIVE ORGAN, UNSPECIFIED                         | 2309  | CA IN SITU GI NEC/NOS                                                                              |
| D02   | CARCINOMA IN SITU OF MIDDLE EAR AND RESPIRATORY SYSTEM                    | 231   | CA IN SITU RESPIRATORY*                                                                            |
| D020  | CARCINOMA IN SITU OF LARYNX                                               | 2310  | CA IN SITU LARYNX                                                                                  |
| D021  | CARCINOMA IN SITU OF TRACHEA                                              | 2311  | CA IN SITU TRACHEA                                                                                 |
| D022  | CARCINOMA IN SITU OF BRONCHUS AND LUNG                                    | 2312  | CA IN SITU BRONCHUS/LUNG                                                                           |
| D023  | CARCINOMA IN SITU OF OTHER PARTS OF RESPIRATORY SYSTEM                    | 2318  | CA IN SITU RESP SYS NEC                                                                            |
| D024  | CARCINOMA IN SITU OF RESPIRATORY SYSTEM, UNSPECIFIED                      | 2319  | CA IN SITU RESP SYS NOS                                                                            |
| D040  | CARCINOMA IN SITU OF SKIN OF LIP                                          | 2320  | CA IN SITU SKIN LIP                                                                                |
| D0410 | CARCINOMA IN SITU OF SKIN OF UNSPECIFIED EYELID, INCLUDING CANTHUS        | 2321  | CA IN SITU EYELID                                                                                  |
| D0420 | CARCINOMA IN SITU OF SKIN OF UNSPECIFIED EAR AND EXTERNAL AURICULAR CANAL | 2322  | CA IN SITU SKIN EAR                                                                                |
| D0430 | CARCINOMA IN SITU OF SKIN OF UNSPECIFIED PART OF FACE                     | 2323  | CA IN SITU SKIN FACE NEC                                                                           |
| D044  | CARCINOMA IN SITU OF SKIN OF SCALP AND NECK                               | 2324  | CA IN SITU SCALP                                                                                   |
| D045  | CARCINOMA IN SITU OF SKIN OF TRUNK                                        | 2325  | CA IN SITU SKIN TRUNK                                                                              |
| D0460 | CARCINOMA IN SITU OF SKIN OF UNSPECIFIED UPPER LIMB, INCLUDING SHOULDER   | 2326  | CA IN SITU SKIN ARM                                                                                |
| D0470 | CARCINOMA IN SITU OF SKIN OF UNSPECIFIED LOWER LIMB, INCLUDING HIP        | 2327  | CA IN SITU SKIN LEG                                                                                |
| D048  | CARCINOMA IN SITU OF SKIN OF OTHER SITES                                  | 2328  | CA IN SITU SKIN NEC                                                                                |
| D049  | CARCINOMA IN SITU OF SKIN, UNSPECIFIED                                    | 2329  | CA IN SITU SKIN NOS                                                                                |
| D059  | CARCINOMA IN SITU OF BREAST, UNSPECIFIED                                  | 233   | CA IN SITU BREAST/GU*                                                                              |
| D0590 | UNSPECIFIED TYPE OF CARCINOMA IN SITU OF UNSPECIFIED BREAST               | 2330  | CA IN SITU BREAST                                                                                  |
| D069  | CARCINOMA IN SITU OF CERVIX, UNSPECIFIED                                  | 2331  | CA IN SITU CERVIX UTERI                                                                            |
| D070  | CARCINOMA IN SITU OF ENDOMETRIUM                                          | 2332  | CA IN SITU UTERUS NEC                                                                              |
| D073  | CARCINOMA IN SITU OF OTHER AND UNSPECIFIED GENITAL ORGANS                 | 2333  | CA IN SITU FEM GEN NEC                                                                             |
| D0730 | CARCINOMA IN SITU OF UNSPECIFIED FEMALE GENITAL ORGANS                    | 23330 | CARCINOMA IN SITU OF OTHER AND UNSPECIFIED FEMALE GENITAL ORGANS; UNSPECIFIED FEMALE GENITAL ORGAN |
| D072  | CARCINOMA IN SITU OF VAGINA                                               | 23331 | CARCINOMA IN SITU OF OTHER AND UNSPECIFIED FEMALE GENITAL ORGANS; VAGINA                           |
| D071  | CARCINOMA IN SITU OF VULVA                                                | 23332 | CARCINOMA IN SITU OF OTHER AND UNSPECIFIED FEMALE GENITAL ORGANS; VULVA                            |

|        |                                                                               |       |                                                                                              |
|--------|-------------------------------------------------------------------------------|-------|----------------------------------------------------------------------------------------------|
| D0739  | CARCINOMA IN SITU OF OTHER FEMALE GENITAL ORGANS                              | 23339 | CARCINOMA IN SITU OF OTHER AND UNSPECIFIED FEMALE GENITAL ORGANS; OTHER FEMALE GENITAL ORGAN |
| D075   | CARCINOMA IN SITU OF PROSTATE                                                 | 2334  | CA IN SITU PROSTATE                                                                          |
| D074   | CARCINOMA IN SITU OF PENIS                                                    | 2335  | CA IN SITU PENIS                                                                             |
| D0760  | CARCINOMA IN SITU OF UNSPECIFIED MALE GENITAL ORGANS                          | 2336  | CA IN SITU MALE GEN NEC                                                                      |
| D090   | CARCINOMA IN SITU OF BLADDER                                                  | 2337  | CA IN SITU BLADDER                                                                           |
| D091   | CARCINOMA IN SITU OF OTHER AND UNSPECIFIED URINARY ORGANS                     | 2339  | CA IN SITU URINARY NEC                                                                       |
| D09    | CARCINOMA IN SITU OF OTHER AND UNSPECIFIED SITES                              | 234   | CA IN SITU NEC/NOS*                                                                          |
| D0920  | CARCINOMA IN SITU OF UNSPECIFIED EYE                                          | 2340  | CA IN SITU EYE                                                                               |
| D098   | CARCINOMA IN SITU OF OTHER SPECIFIED SITES                                    | 2348  | CA IN SITU NEC                                                                               |
| D099   | CARCINOMA IN SITU, UNSPECIFIED                                                | 2349  | CA IN SITU NOS                                                                               |
| D37    | NEOPLASM OF UNCERTAIN OR UNKNOWN BEHAVIOR OF ORAL CAVITY AND DIGESTIVE ORGANS | 235   | UNC BEHAV NEO GI/RESP*                                                                       |
| D37039 | NEOPLASM OF UNCERTAIN BEHAVIOR OF THE MAJOR SALIVARY GLANDS, UNSPECIFIED      | 2350  | UNC BEHAV NEO SALIVARY                                                                       |
| D370   | Neoplasm of uncertain behavior of lip, oral cavity and pharynx                | 2351  | UNC BEHAV NEO ORAL/PHAR                                                                      |
| D378   | Neoplasm of uncertain behavior of other specified digestive organs            | 2352  | UNC BEHAV NEO INTESTINE                                                                      |
| D376   | NEOPLASM OF UNCERTAIN BEHAVIOR OF LIVER, GALLBLADDER AND BILE DUCTS           | 2353  | UNC BEHAV NEO LIVER                                                                          |
| D484   | NEOPLASM OF UNCERTAIN BEHAVIOR OF PERITONEUM                                  | 2354  | UNC BEHAV NEO PERITONEUM                                                                     |
| D379   | NEOPLASM OF UNCERTAIN BEHAVIOR OF DIGESTIVE ORGAN, UNSPECIFIED                | 2355  | UNC BEHAV NEO GI NEC                                                                         |
| D380   | NEOPLASM OF UNCERTAIN BEHAVIOR OF LARYNX                                      | 2356  | UNC BEHAV NEO LARYNX                                                                         |
| D381   | NEOPLASM OF UNCERTAIN BEHAVIOR OF TRACHEA, BRONCHUS AND LUNG                  | 2357  | UNC BEHAV NEO LUNG                                                                           |
| D385   | NEOPLASM OF UNCERTAIN BEHAVIOR OF OTHER RESPIRATORY ORGANS                    | 2358  | UNC BEHAV NEO PLEURA                                                                         |
| D386   | NEOPLASM OF UNCERTAIN BEHAVIOR OF RESPIRATORY ORGAN, UNSPECIFIED              | 2359  | UNC BEHAV NEO RESP NEC                                                                       |
| D39    | Neoplasm of uncertain behavior of female genital organs                       | 236   | UNC BEHAV NEO GU*                                                                            |
| D390   | NEOPLASM OF UNCERTAIN BEHAVIOR OF UTERUS                                      | 2360  | UNCERT BEHAV NEO UTERUS                                                                      |
| D392   | NEOPLASM OF UNCERTAIN BEHAVIOR OF PLACENTA                                    | 2361  | UNC BEHAV NEO PLACENTA                                                                       |
| D3910  | NEOPLASM OF UNCERTAIN BEHAVIOR OF UNSPECIFIED OVARY                           | 2362  | UNC BEHAV NEO OVARY                                                                          |
| D399   | NEOPLASM OF UNCERTAIN BEHAVIOR OF FEMALE GENITAL ORGAN, UNSPECIFIED           | 2363  | UNC BEHAV NEO FEMALE NEC                                                                     |
| D401   | NEOPLASM OF UNCERTAIN BEHAVIOR OF TESTIS                                      | 2364  | UNC BEHAV NEO TESTIS                                                                         |
| D400   | NEOPLASM OF UNCERTAIN BEHAVIOR OF PROSTATE                                    | 2365  | UNC BEHAV NEO PROSTATE                                                                       |
| D409   | NEOPLASM OF UNCERTAIN BEHAVIOR OF MALE GENITAL ORGAN, UNSPECIFIED             | 2366  | UNC BEHAV NEO MALE NEC                                                                       |
| D414   | NEOPLASM OF UNCERTAIN BEHAVIOR OF BLADDER                                     | 2367  | UNC BEHAV NEO BLADDER                                                                        |
| D41    | NEOPLASM OF UNCERTAIN OR UNKNOWN BEHAVIOR OF URINARY ORGANS                   | 2369  | UNC BEHAV NEO OTH URINAR*                                                                    |
| D419   | NEOPLASM OF UNCERTAIN BEHAVIOR OF UNSPECIFIED URINARY ORGAN                   | 23690 | UNC BEHAV NEO URINAR NOS                                                                     |
| D4100  | NEOPLASM OF UNCERTAIN BEHAVIOR OF UNSPECIFIED KIDNEY                          | 23691 | UNC BEHAV NEO KIDNEY                                                                         |
| D418   | NEOPLASM OF UNCERTAIN BEHAVIOR OF OTHER SPECIFIED URINARY ORGANS              | 23699 | UNC BEHAV NEO URINAR NEC                                                                     |
| D44    | NEOPLASM OF UNCERTAIN BEHAVIOR OF OF ENDOCRINE GLANDS                         | 237   | UNCER NEO ENDOCRINE/NERV*                                                                    |
| D44    | NEOPLASM OF UNCERTAIN BEHAVIOR OF OF ENDOCRINE GLANDS                         | 2370  | UNC BEHAV NEO PITUITARY                                                                      |
| D445   | NEOPLASM OF UNCERTAIN BEHAVIOR OF PINEAL GLAND                                | 2371  | UNC BEHAV NEO PINEAL                                                                         |
| D4410  | NEOPLASM OF UNCERTAIN BEHAVIOR OF UNSPECIFIED ADRENAL GLAND                   | 2372  | UNC BEHAV NEO ADRENAL                                                                        |
| D447   | NEOPLASM OF UNCERTAIN BEHAVIOR OF AORTIC BODY AND OTHER PARAGANGLIA           | 2373  | UNC BEHAV NEO PARAGANG                                                                       |
| D449   | NEOPLASM OF UNCERTAIN BEHAVIOR OF UNSPECIFIED ENDOCRINE GLAND                 | 2374  | UNCER NEO ENDOCRINE NEC                                                                      |
| D43    | NEOPLASM OF UNCERTAIN OR UNKNOWN BEHAVIOR OF BRAIN AND CENTRAL NERVOUS SYSTEM | 2375  | UNC BEH NEO BRAIN/SPINAL                                                                     |
| D429   | NEOPLASM OF UNCERTAIN BEHAVIOR OF MENINGES, UNSPECIFIED                       | 2376  | UNC BEHAV NEO MENINGES                                                                       |



|       |                                                                                               |       |                                             |
|-------|-----------------------------------------------------------------------------------------------|-------|---------------------------------------------|
| Q85   | Phakomatoses, not elsewhere classified                                                        | 2377  | NEUROFIBROMATOSIS*                          |
| Q8500 | NEUROFIBROMATOSIS, UNSPECIFIED                                                                | 23770 | NEUROFIBROMATOSIS NOS                       |
| Q8501 | NEUROFIBROMATOSIS, TYPE 1                                                                     | 23771 | NEUROFIBROMATOSIS TYPE I                    |
| Q8502 | NEUROFIBROMATOSIS, TYPE 2                                                                     | 23772 | NEUROFIBROMATOSIS TYP II                    |
| Q8503 | SCHWANNOMATOSIS                                                                               | 23773 | SCHWANNOMATOSIS                             |
| Q8509 | OTHER NEUROFIBROMATOSIS                                                                       | 23779 | OTHER NEUROFIBROMATOSIS                     |
| D439  | NEOPLASM OF UNCERTAIN BEHAVIOR OF CENTRAL NERVOUS SYSTEM, UNSPECIFIED                         | 2379  | UNC BEH NEO NERV SYS NEC                    |
| D48   | Neoplasm of uncertain behavior of other and unspecified sites                                 | 238   | UNC BEHAV NEO NEC/NOS*                      |
| D480  | NEOPLASM OF UNCERTAIN BEHAVIOR OF BONE AND ARTICULAR CARTILAGE                                | 2380  | UNC BEHAV NEO BONE                          |
| D481  | NEOPLASM OF UNCERTAIN BEHAVIOR OF CONNECTIVE AND OTHER SOFT TISSUE                            | 2381  | UNC BEHAV NEO SOFT TISSU                    |
| D485  | NEOPLASM OF UNCERTAIN BEHAVIOR OF SKIN                                                        | 2382  | UNC BEHAV NEO SKIN                          |
| D4860 | NEOPLASM OF UNCERTAIN BEHAVIOR OF UNSPECIFIED BREAST                                          | 2383  | UNC BEHAV NEO BREAST                        |
| D45   | POLYCYTHEMIA VERA                                                                             | 2384  | POLYCYTHEMIA VERA                           |
| D470  | HISTIOCYTIC AND MAST CELL TUMORS OF UNCERTAIN BEHAVIOR                                        | 2385  | MASTOCYTOMA NOS                             |
| D47Z9 | OTHER SPECIFIED NEOPLASMS OF UNCERTAIN BEHAVIOR OF LYMPHOID, HEMATOPOIETIC AND RELATED TISSUE | 2386  | PLASMACYTOMA NOS                            |
| D47Z9 | OTHER SPECIFIED NEOPLASMS OF UNCERTAIN BEHAVIOR OF LYMPHOID, HEMATOPOIETIC AND RELATED TISSUE | 2387  | LYMPHOPROLIFERAT DIS NOS                    |
| D473  | ESSENTIAL (HEMORRHAGIC) THROMBOCYTHEMIA                                                       | 23871 | ESSENTIAL THROMBOCYTHEMIA                   |
| D46   | Myelodysplastic syndromes                                                                     | 23872 | LOW GRADE MYELODYSPLASTIC SYNDROME LESIONS  |
| D4622 | REFRACTORY ANEMIA WITH EXCESS OF BLASTS 2                                                     | 23873 | HIGH GRADE MYELODYSPLASTIC SYNDROME LESIONS |
| D487  | NEOPLASM OF UNCERTAIN BEHAVIOR OF OTHER SPECIFIED SITES                                       | 2388  | UNCERT BEHAVIOR NEO NEC                     |
| D489  | NEOPLASM OF UNCERTAIN BEHAVIOR, UNSPECIFIED                                                   | 2389  | UNCERT BEHAVIOR NEO NOS                     |
| D49   | Neoplasms of unspecified behavior                                                             | 239   | UNSPECIFIED NEOPLASM*                       |
| D490  | NEOPLASM OF UNSPECIFIED BEHAVIOR OF DIGESTIVE SYSTEM                                          | 2390  | DIGESTIVE NEOPLASM NOS                      |
| D491  | NEOPLASM OF UNSPECIFIED BEHAVIOR OF RESPIRATORY SYSTEM                                        | 2391  | RESPIRATORY NEOPLASM NOS                    |
| D492  | NEOPLASM OF UNSPECIFIED BEHAVIOR OF BONE, SOFT TISSUE, AND SKIN                               | 2392  | BONE/SKIN NEOPLASM NOS                      |
| D493  | NEOPLASM OF UNSPECIFIED BEHAVIOR OF BREAST                                                    | 2393  | BREAST NEOPLASM NOS                         |
| D494  | NEOPLASM OF UNSPECIFIED BEHAVIOR OF BLADDER                                                   | 2394  | BLADDER NEOPLASM NOS                        |
| D495  | NEOPLASM OF UNSPECIFIED BEHAVIOR OF OTHER GENITOURINARY ORGANS                                | 2395  | OTHER GU NEOPLASM NOS                       |
| D496  | NEOPLASM OF UNSPECIFIED BEHAVIOR OF BRAIN                                                     | 2396  | BRAIN NEOPLASM NOS                          |
| D497  | NEOPLASM OF UNSPECIFIED BEHAVIOR OF ENDOCRINE GLANDS AND OTHER PARTS OF NERVOUS SYSTEM        | 2397  | ENDOCRINE/NERV NEO NOS                      |
| D498  | Neoplasm of unspecified behavior of other specified sites                                     | 2398  | NEOPLASM NOS, SITE NEC                      |
| D499  | NEOPLASM OF UNSPECIFIED BEHAVIOR OF UNSPECIFIED SITE                                          | 2399  | NEOPLASM NOS                                |

**Table S2e. ICD-9 and ICD-19 Codes for Kidney disease or other complications due to renal dialysis**

| ICD-10 Codes | ICD-9 Codes | Description              |
|--------------|-------------|--------------------------|
| N00          | 580         | ACUTE NEPHRITIS          |
| N003         | 5800        | AC PROLIFERAT NEPHRITIS  |
| N013         | 5804        | AC RAPIDLY PROGR NEPHRIT |
| N008         | 5808        | AC NEPHRITIS W OTH LES   |
| N08          | 58081       | AC NEPHRITIS IN OTH DIS  |
| N008         | 58089       | ACUTE NEPHRITIS NEC      |
| N009         | 5809        | ACUTE NEPHRITIS NOS      |
| N04          | 581         | NEPHROTIC SYNDROME       |
| N044         | 5810        | NEPHROTIC SYN, PROLIFER  |
| N022         | 5811        | EPIMEMBRANOUS NEPHRITIS  |
| N043         | 5812        | MEMBRANOPROLIF NEPHROSIS |
| N040         | 5813        | MINIMAL CHANGE NEPHROSIS |
| N041         | 5818        | NEPHROTIC SYN W OTH LES  |
| N08          | 58181       | NEPHROTIC SYN IN OTH DIS |
| N048         | 58189       | NEPHROTIC SYNDROME NEC   |
| N049         | 5819        | NEPHROTIC SYNDROME NOS   |
| N03          | 582         | CHRONIC NEPHRITIS        |
| N032         | 5820        | CHR PROLIFERAT NEPHRITIS |
| N033         | 5821        | CHR MEMBRANOUS NEPHRITIS |
| N035         | 5822        | CHR MEMBRANOPROLIF NEPHR |
| N038         | 5824        | CHR RAPID PROGR NEPHRIT  |
| N038         | 5828        | CHR NEPHRITIS W OTH LES  |
| N08          | 58281       | CHR NEPHRITIS IN OTH DIS |
| N038         | 58289       | CHRONIC NEPHRITIS NEC    |
| N039         | 5829        | CHRONIC NEPHRITIS NOS    |
| N059         | 583         | NEPHRITIS NOS            |
| N059         | 5830        | PROLIFERAT NEPHRITIS NOS |
| N052         | 5831        | MEMBRANOUS NEPHRITIS NOS |
| N055         | 5832        | MEMBRANOPROLIF NEPHR NOS |
| N059         | 5834        | RAPIDLY PROG NEPHRIT NOS |
| N171         | 5836        | RENAL CORT NECROSIS NOS  |
| N172         | 5837        | NEPHR NOS/MEDULL NECROS  |
| N059         | 5838        | NEPHRITIS NOS W OTH LES  |
| N08          | 58381       | NEPHRITIS NOS IN OTH DIS |
| N058         | 58389       | NEPHRITIS NEC            |
| N059         | 5839        | NEPHRITIS NOS            |
| N17          | 584         | ACUTE RENAL FAILURE      |
| N170         | 5845        | LOWER NEPHRON NEPHROSIS  |
| N171         | 5846        | AC RENAL FAIL, CORT NECR |
| N172         | 5847        | AC REN FAIL, MEDULL NECR |

|       |       |                                             |
|-------|-------|---------------------------------------------|
| N178  | 5848  | AC RENAL FAILURE NEC                        |
| N179  | 5849  | ACUTE RENAL FAILURE NOS                     |
| N18   | 585   | CHRONIC RENAL FAILURE                       |
| N181  | 5851  | Chronic kidney disease, stage 1             |
| N182  | 5852  | Chronic kidney disease, stage 2 (mild)      |
| N183  | 5853  | Chronic kidney disease, stage 3 (moderate)  |
| N1830 | 5853  | Chronic kidney disease, stage 3 unspecified |
| N1831 | 5853  | Chronic kidney disease, stage 3a            |
| N1832 | 5853  | Chronic kidney disease, stage 3b            |
| N184  | 5854  | Chronic kidney disease, stage 4 (severe)    |
| N185  | 5855  | Chronic kidney disease, stage 5             |
| N186  | 5856  | End stage renal disease                     |
| N189  | 5859  | Chronic kidney disease, unspecified         |
| N19   | 586   | RENAL FAILURE NOS                           |
| N269  | 587   | RENAL SCLEROSIS NOS                         |
| N25   | 588   | IMPAIRED RENAL FUNCTION                     |
| N250  | 5880  | RENAL OSTEODYSTROPHY                        |
| N251  | 5881  | NEPHROGEN DIABETES INSIP                    |
| N2589 | 5888  | IMPAIRED RENAL FUNCT NEC                    |
| N259  | 5889  | IMPAIRED RENAL FUNCT NOS                    |
| N27   | 589   | SMALL KIDNEY                                |
| N270  | 5890  | UNILATERAL SMALL KIDNEY                     |
| N271  | 5891  | BILATERAL SMALL KIDNEYS                     |
| N279  | 5899  | SMALL KIDNEY NOS                            |
| N11   | 590   | CHRONIC NEPHRITIS                           |
| N110  | 5900  | CHRONIC PYELONEPHRITIS                      |
| N110  | 59000 | CHR PYELONEPHRITIS NOS                      |
| N118  | 59001 | CHR PYELONEPH W MED NECR                    |
| N10   | 5901  | ACUTE PYELONEPHRITIS                        |
| N10   | 59010 | AC PYELONEPHRITIS NOS                       |
| N10   | 59011 | AC PYELONEPHR W MED NECR                    |
| N151  | 5902  | RENAL/PERIRENAL ABSCESS                     |
| N2884 | 5903  | PYELOURETERITIS CYSTICA                     |
| N12   | 5908  | OTHER PYELONEPHRITIS                        |
| N12   | 59080 | PYELONEPHRITIS NOS                          |
| N12   | 59081 | PYELONEPHRIT IN OTH DIS                     |
| N159  | 5909  | INFECTION OF KIDNEY NOS                     |
| N130  | 591   | HYDRONEPHROSIS                              |
| N131  | 591   | HYDRONEPHROSIS                              |
| N132  | 591   | HYDRONEPHROSIS                              |
| N133  | 591   | HYDRONEPHROSIS                              |
| N136  | 591   | HYDRONEPHROSIS                              |
| N20   | 592   | RENAL/URETERAL CALCULUS                     |
| N200  | 5920  | CALCULUS OF KIDNEY                          |

|         |       |                          |
|---------|-------|--------------------------|
| N201    | 5921  | CALCULUS OF URETER       |
| N209    | 5929  | URINARY CALCULUS NOS     |
| N288    | 593   | OTH RENAL & URETERAL DIS |
| N2883   | 5930  | NEPHROPTOSIS             |
| N2881   | 5931  | HYPERTROPHY OF KIDNEY    |
| N281    | 5932  | CYST OF KIDNEY, ACQUIRED |
| N135    | 5933  | STRICTURE OF URETER      |
| N138    | 5934  | URETERIC OBSTRUCTION NEC |
| N134    | 5935  | HYDROURETER              |
| R802    | 5936  | POSTURAL PROTEINURIA     |
| N137    | 5937  | VESICoureTERAL REFLUX    |
| N1370   | 59370 | VESCOURETRL RFLUX UNSPCF |
| N13721  | 59371 | VSCURT RFLX NPHT UNILTRL |
| N13722  | 59372 | VSCOURTL RFLX NPHT BLTRL |
| N13729  | 59373 | VSCOURTL RFLX W NPHT NOS |
| N28     | 5938  | OTH RENAL & URETERAL DIS |
| N280    | 59381 | RENAL VASCULAR DISORDER  |
| N2889   | 59382 | URETERAL FISTULA         |
| N2889   | 59389 | RENAL & URETERAL DIS NEC |
| N289    | 5939  | RENAL & URETERAL DIS NOS |
| Q610    | 7531  | CYSTIC KIDNEY DISEASE    |
| Q611    | 7531  | CYSTIC KIDNEY DISEASE    |
| Q612    | 75310 | CYSTIC KIDNEY DISEAS NOS |
| Q613    | 75311 | CONGENITAL RENAL CYST    |
| Q614    | 75312 | POLYCYSTIC KIDNEY NOS    |
| Q615    | 75313 | POLYCYST KID-AUTOSOM DOM |
| Q618    | 75314 | POLYCYST KID-AUTOSOM REC |
| Q619    | 75315 | RENAL DYSPLASIA          |
| Q615    | 75316 | MEDULLARY CYSTIC KIDNEY  |
| Q615    | 75317 | MEDULLARY SPONGE KIDNEY  |
| Q615    | 75319 | CYSTIC KIDNEY DISEAS NEC |
| Q630    | 7533  | KIDNEY ANOMALY NEC       |
| Q631    | 7533  | KIDNEY ANOMALY NEC       |
| Q632    | 7533  | KIDNEY ANOMALY NEC       |
| Q633    | 7533  | KIDNEY ANOMALY NEC       |
| Q638    | 7533  | KIDNEY ANOMALY NEC       |
| T82898A | 99673 | COMP-REN DIALYS DEV/GRFT |
| T861    | 99681 | COMPL KIDNEY TRANSPLANT  |
| Z992    | 3995  | HEMODIALYSIS             |
| Z940    | 556   | KIDNEY TRANSPLANT        |
| Z940    | 5561  | RENAL AUTOTRANSPLANT     |
| Z940    | 5569  | KIDNEY TRANSPLANT NEC    |

**Table S3. Baseline characteristics of participants eligible for Medicare and enrolled for Medicare Part-D by three comparison groups in 2007**

|                                 | Participants, No (%) |              |              |              | P value |
|---------------------------------|----------------------|--------------|--------------|--------------|---------|
|                                 | Chlorthalidone       | Amlodipine   | Lisinopril   | Total        |         |
| Eligible number of participants | 3637                 | 2189         | 2181         | 8007         |         |
| Age, mean [range], years        | 67.8 [55-94]         | 67.9 [55-89] | 67.7 [55-90] | 67.8 [55-94] | 0.231   |
| 55-64                           | 1162 (31.9)          | 694 (31.7)   | 706 (32.4)   | 2562 (32.0)  | 0.786   |
| 65-69                           | 1183 (32.5)          | 693 (31.7)   | 716 (32.8)   | 2592 (32.4)  |         |
| 70 or older                     | 1292 (35.5)          | 802 (36.6)   | 759 (34.8)   | 2651 (35.2)  |         |
| Sex                             |                      |              |              |              |         |
| Women                           | 2355 (64.8)          | 1442 (65.9)  | 1399 (64.1)  | 5196 (64.9)  | 0.474   |
| Men                             | 1282 (35.2)          | 747 (34.1)   | 782 (35.9)   | 2811 (35.1)  |         |
| Race/ethnicity                  |                      |              |              |              |         |
| Black                           | 1395 (38.4)          | 826 (37.7)   | 802 (36.8)   | 3023 (37.8)  | 0.483   |
| Non-Black                       | 2242 (61.6)          | 1363 (62.3)  | 1379 (63.2)  | 4984 (62.2)  |         |
| Hispanic ethnicity*             |                      |              |              |              |         |
| Hispanic                        | 898 (24.8)           | 509 (23.4)   | 574 (26.5)   | 1981 (24.9)  | 0.063   |
| Non-Hispanic                    | 2723 (75.2)          | 1663 (76.6)  | 1591 (73.5)  | 5977 (75.1)  |         |
| Education, mean (SD), years*    | 10.4 (4.1)           | 10.3 (4.0)   | 10.3 (4.3)   | 10.4 (4.1)   | <0.001  |
| Antihypertensive treatment      |                      |              |              |              |         |
| Treated (prior to baseline)     | 3303 (90.8)          | 1974 (90.2)  | 1984 (91.0)  | 7261 (90.7)  | 0.623   |

|                                                |              |              |              |              |       |
|------------------------------------------------|--------------|--------------|--------------|--------------|-------|
| Untreated                                      | 334 (9.2)    | 215 (9.8)    | 197 (9.0)    | 746 (9.3)    |       |
| Aspirin use at baseline*                       |              |              |              |              |       |
| Yes aspirin used                               | 1160 (32.4)  | 699 (32.3)   | 704 (32.7)   | 2563 (32.5)  | 0.964 |
| On pravastatin                                 | 506 (13.9)   | 301 (13.8)   | 309 (14.2)   | 1116 (13.9)  | 0.922 |
| Women taking estrogen*                         | 417 (18.0)   | 238 (16.7)   | 219 (15.9)   | 874 (17.1)   | 0.224 |
| HDL, mean (SD), mg/dl*                         | 48.8 (14.6)  | 48.8 (14.5)  | 49.0 (14.8)  | 48.8 (14.6)  | 0.673 |
| LDL, mean (SD), mg/dl*                         | 137.9 (37.8) | 136.6 (36.9) | 137.3 (37.0) | 137.4 (37.3) | 0.339 |
| HDL <35 mg/dl                                  | 386 (10.6)   | 240 (11.0)   | 227 (10.4)   | 853 (10.7)   | 0.833 |
| GFR, mean (SD)*                                | 77.9 (18.2)  | 77.9 (18.1)  | 77.9 (18.4)  | 77.9 (18.2)  | 0.821 |
| Diabetes classification                        |              |              |              |              |       |
| Diabetic                                       | 1280 (35.2)  | 761 (34.8)   | 783 (35.9)   | 2824 (35.3)  | 0.728 |
| Non-diabetic                                   | 2357 (64.8)  | 1428 (65.2)  | 1398 (64.1)  | 5183 (64.7)  |       |
| Cigarette smoking                              |              |              |              |              |       |
| Smoker (current)                               | 605 (16.6)   | 381 (17.4)   | 338 (15.5)   | 1324 (16.5)  | 0.234 |
| Nonsmoker<br>(non/former)                      | 3032 (83.4)  | 1808 (82.6)  | 1842 (84.5)  | 6682 (83.5)  |       |
| History of CHD*                                | 848 (23.5)   | 484 (22.3)   | 473 (21.9)   | 1805 (22.7)  | 0.326 |
| Atherosclerotic CVD (yes<br>if any of 4 below) | 1870 (51.4)  | 1095 (50.0)  | 1083 (49.7)  | 4048 (50.6)  | 0.362 |
| History MI or stroke                           | 735 (20.2)   | 463 (21.2)   | 422 (19.3)   | 1620 (20.2)  | 0.333 |
| History coronary<br>revascularization          | 406 (11.2)   | 211 (9.6)    | 241 (11.0)   | 858 (10.7)   | 0.160 |
| Other atherosclerotic<br>CVD                   | 914 (25.1)   | 553 (25.3)   | 518 (23.8)   | 1985 (24.8)  | 0.416 |
| ST-T wave*                                     | 383 (10.6)   | 204 (9.4)    | 249 (11.5)   | 836 (10.5)   | 0.074 |
| LVH by Minnesota code*                         | 134 (4.4)    | 94 (5.1)     | 76 (4.2)     | 304 (4.5)    | 0.329 |

|                                      |              |              |              |              |        |
|--------------------------------------|--------------|--------------|--------------|--------------|--------|
| SBP, mean (SD), mmHg                 | 145.5 (12.8) | 145.6 (13.1) | 145.5 (12.9) | 145.5 (12.9) | 0.445  |
| DBP, mean (SD), mmHg                 | 83.8 (8.7)   | 83.8 (8.8)   | 83.5 (8.7)   | 83.7 (8.8)   | 0.814  |
| Final SBP, mean (SD), mmHg           | 136.1 (15.9) | 135.9 (15.3) | 137.8 (17.5) | 136.5 (16.2) | <0.001 |
| BMI, mean (SD), mg/kg <sup>2</sup> * | 30.3 (6.3)   | 30.1 (6.1)   | 30.1 (6.1)   | 30.2 (6.2)   | 0.032  |
| Obesity*                             | 1594 (43.9)  | 955 (43.7)   | 976 (44.9)   | 3525 (44.1)  | 0.717  |
| Lipid trial participants             | 987 (27.1)   | 575 (26.3)   | 572 (26.2)   | 2134 (26.7)  | 0.668  |

---

\*Reduced denominator Chlorthalidone/Amlodipine/Lisinopril available for Aspirin: C=3581/A=2162/L=2154; BMI: C=3627/A=2183/L=2175; Education: C=3374/A=2025/L=2011; Estrogen: C=2312/A=1423/L=1378; GFR: C=3497/A=2083/L=2075; HDL: C=3484/A=2078/L=2067; Hispanic: C=3621/A=2172/L=2165; History of CHD: C=3611/A=2170/L=2160; LDL: C=3314/A=1971/L=1962; LVH by Minnesota code: C=3065/A=1837/L=1827; Obesity: C=3627/A=2183/L=2175; ST-T wave: C=3608/A=2165/L=2156.

**Table S4a. Patterns of antihypertensive drug utilization from Medicare Part-D drug coverage in 2007, by 3 arms and added-on drugs (Black)**

| Total Black Participants: N=3024                                                                           | N (%) of antihypertensive drug who received the study class drug |                                          |                                           |                                             | N (%) of antihypertensive drug who did not receive the study trial drug |                                |                                |                                 |
|------------------------------------------------------------------------------------------------------------|------------------------------------------------------------------|------------------------------------------|-------------------------------------------|---------------------------------------------|-------------------------------------------------------------------------|--------------------------------|--------------------------------|---------------------------------|
|                                                                                                            | 1) any diuretic<br>(1 drug)                                      | 2) any diuretic plus 1 drug<br>(2 drugs) | 3) any diuretic plus 2 drugs<br>(3 drugs) | 4) any diuretic plus ≥3 drugs<br>(4+ drugs) | 1) no diuretic<br>(on 1 drug)                                           | 2) no diuretic<br>(on 2 drugs) | 3) no diuretic<br>(on 3 drugs) | 4) no diuretic<br>(on 4+ drugs) |
| <b>Diuretic= Thiazide/thiazide-type</b><br>[Randomized to Chlorthalidone in trial: 1395 (46.1)]            |                                                                  |                                          |                                           |                                             |                                                                         |                                |                                |                                 |
| Aldosterone antagonists <sup>†</sup>                                                                       |                                                                  | 0 (0)                                    | 1 (0.1)                                   | 16 (1.1)                                    | 2 (0.1)                                                                 | 1 (0.1)                        | 11 (0.8)                       | 32 (2.3)                        |
| Alpha 1 adrenergic receptor agonist (selective; <b>α-blocker</b> )                                         |                                                                  | 0 (0)                                    | 6 (0.4)                                   | 24 (1.7)                                    | 1 (0.1)                                                                 | 1 (0.1)                        | 8 (0.6)                        | 13 (0.9)                        |
| Angiotensin-converting enzyme ( <b>ACE</b> ) inhibitor/<br>Angiotensin II receptor blockers ( <b>ARB</b> ) |                                                                  | 76 (5.4)                                 | 171 (12.3)                                | 259 (18.6)                                  | 50 (3.6)                                                                | 108 (7.7)                      | 127 (9.1)                      | 140 (10)                        |
| Arteriolar vasodilators                                                                                    |                                                                  | 0 (0)                                    | 4 (0.3)                                   | 30 (2.2)                                    | 1 (0.1)                                                                 | 2 (0.1)                        | 10 (0.7)                       | 38 (2.7)                        |
| Autonomic ganglionic vasodilators                                                                          |                                                                  | 0 (0)                                    | 0 (0)                                     | 0 (0)                                       | 0 (0)                                                                   | 0 (0)                          | 0 (0)                          | 0 (0)                           |
| Beta adrenergic blockers ( <b>β-blockers</b> )                                                             |                                                                  | 34 (2.4)                                 | 85 (6.1)                                  | 224 (16.1)                                  | 24 (1.7)                                                                | 78 (5.6)                       | 112 (8)                        | 132 (9.5)                       |
| Calcium channel blocker ( <b>CCB</b> )-<br>dihydropyridine/non-dihydropyridine                             |                                                                  | 17 (1.2)                                 | 110 (7.9)                                 | 218 (15.6)                                  | 56 (4)                                                                  | 92 (6.6)                       | 106 (7.6)                      | 126 (9)                         |
| Central alpha 2 adrenergic agonists                                                                        |                                                                  | 2 (0.1)                                  | 6 (0.4)                                   | 60 (4.3)                                    | 5 (0.4)                                                                 | 9 (0.6)                        | 24 (1.7)                       | 48 (3.4)                        |
| Diuretics: thiazide/thiazide-type                                                                          | 32 (2.3)                                                         | 148 (10.6)                               | 212 (15.2)                                | 277 (19.9)                                  | 0 (0)                                                                   | 0 (0)                          | 0 (0)                          | 0 (0)                           |
| Diuretics: loop                                                                                            |                                                                  | 5 (0.4)                                  | 21 (1.5)                                  | 96 (6.9)                                    | 12 (0.9)                                                                | 64 (4.6)                       | 101 (7.2)                      | 128 (9.2)                       |
| Diuretics: potassium-sparing <sup>†</sup>                                                                  |                                                                  | 14 (1)                                   | 20 (1.4)                                  | 42 (3)                                      | 1 (0.1)                                                                 | 3 (0.2)                        | 2 (0.1)                        | 4 (0.3)                         |
| Peripheral adrenergic neuron antagonist <sup>†</sup>                                                       |                                                                  | 0 (0)                                    | 0 (0)                                     | 1 (0.1)                                     | 0 (0)                                                                   | 0 (0)                          | 0 (0)                          | 1 (0.1)                         |
| Renin inhibitors                                                                                           |                                                                  | 0 (0)                                    | 0 (0)                                     | 8 (0.6)                                     | 0 (0)                                                                   | 0 (0)                          | 0 (0)                          | 0 (0)                           |
| <b>Total participants</b>                                                                                  | <b>32 (2.3)</b>                                                  | <b>148 (10.6)</b>                        | <b>212 (15.2)</b>                         | <b>277 (19.9)</b>                           | <b>152 (10.9)</b>                                                       | <b>179 (12.8)</b>              | <b>167 (12)</b>                | <b>153 (11)</b>                 |
| <b>Calcium channel blocker (CCB)</b><br>[Randomized to Amlodipine in trial: 827 (27.3)]                    | 1) any CCB<br>(1 drug)                                           | 2) any CCB plus 1 drug                   | 3) any CCB plus 2 drugs                   | 4) any CCB plus ≥3 drugs                    | 1) no CCB<br>(on 1 drug)                                                | 2) no CCB<br>(on 2 drugs)      | 3) no CCB<br>(on 3 drugs)      | 4) no CCB<br>(on 4+ drugs)      |



|                                                                                             |                            | (2 drugs)                               | (3 drugs)                                | (4+ drugs)                                 |                              |                               |                               |                                |
|---------------------------------------------------------------------------------------------|----------------------------|-----------------------------------------|------------------------------------------|--------------------------------------------|------------------------------|-------------------------------|-------------------------------|--------------------------------|
| Aldosterone antagonists <sup>†</sup>                                                        |                            | 0 (0)                                   | 1 (0.1)                                  | 15 (1.8)                                   | 0 (0)                        | 2 (0.2)                       | 5 (0.6)                       | 9 (1.1)                        |
| Alpha 1 adrenergic receptor agonist (selective; <b>α-blocker</b> )                          |                            | 1 (0.1)                                 | 2 (0.2)                                  | 20 (2.4)                                   | 1 (0.1)                      | 4 (0.5)                       | 5 (0.6)                       | 8 (1)                          |
| Angiotensin-converting enzyme (ACE) inhibitor/Angiotensin II receptor blockers (ARB)        |                            | 42 (5.1)                                | 102 (12.3)                               | 205 (24.8)                                 | 29 (3.5)                     | 74 (8.9)                      | 72 (8.7)                      | 37 (4.5)                       |
| Arteriolar vasodilators                                                                     |                            | 0 (0)                                   | 5 (0.6)                                  | 40 (4.8)                                   | 0 (0)                        | 3 (0.4)                       | 3 (0.4)                       | 12 (1.5)                       |
| Autonomic ganglionic vasodilators                                                           |                            | 0 (0)                                   | 0 (0)                                    | 0 (0)                                      | 0 (0)                        | 0 (0)                         | 0 (0)                         | 0 (0)                          |
| Beta adrenergic blockers ( <b>β-blockers</b> )                                              |                            | 16 (1.9)                                | 55 (6.7)                                 | 184 (22.2)                                 | 18 (2.2)                     | 38 (4.6)                      | 58 (7)                        | 35 (4.2)                       |
| Calcium channel blocker (CCB)-dihydropyridine/non-dihydropyridine                           | 37 (4.5)                   | 87 (10.5)                               | 139 (16.8)                               | 229 (27.7)                                 | 0 (0)                        | 0 (0)                         | 0 (0)                         | 0 (0)                          |
| Central alpha 2 adrenergic agonists                                                         |                            | 4 (0.5)                                 | 7 (0.8)                                  | 61 (7.4)                                   | 1 (0.1)                      | 5 (0.6)                       | 13 (1.6)                      | 14 (1.7)                       |
| Diuretics: thiazide/thiazide-type                                                           |                            | 18 (2.2)                                | 64 (7.7)                                 | 149 (18)                                   | 8 (1)                        | 63 (7.6)                      | 49 (5.9)                      | 28 (3.4)                       |
| Diuretics: loop                                                                             |                            | 6 (0.7)                                 | 36 (4.4)                                 | 114 (13.8)                                 | 10 (1.2)                     | 20 (2.4)                      | 38 (4.6)                      | 30 (3.6)                       |
| Diuretics: potassium-sparing <sup>†</sup>                                                   |                            | 0 (0)                                   | 6 (0.7)                                  | 21 (2.5)                                   | 0 (0)                        | 3 (0.4)                       | 5 (0.6)                       | 5 (0.6)                        |
| Peripheral adrenergic neuron antagonist <sup>†</sup>                                        |                            | 0 (0)                                   | 0 (0)                                    | 0 (0)                                      | 0 (0)                        | 0 (0)                         | 0 (0)                         | 0 (0)                          |
| Renin inhibitors                                                                            |                            | 0 (0)                                   | 0 (0)                                    | 0 (0)                                      | 0 (0)                        | 0 (0)                         | 1 (0.1)                       | 1 (0.1)                        |
| <b>Total participants</b>                                                                   | <b>37 (4.5)</b>            | <b>87 (10.5)</b>                        | <b>139 (16.8)</b>                        | <b>229 (27.7)</b>                          | <b>67 (8.1)</b>              | <b>106 (12.8)</b>             | <b>83 (10)</b>                | <b>42 (5.1)</b>                |
| <b>Angiotensin-converting enzyme (ACE) inhibitor/Angiotensin II receptor blockers (ARB)</b> |                            |                                         |                                          |                                            |                              |                               |                               |                                |
| [Randomized to Lisinopril in trial: 802 (26.5)]                                             | 1) any ACE/ARB<br>(1 drug) | 2) any ACE/ARB plus 1 drug<br>(2 drugs) | 3) any ACE/ARB plus 2 drugs<br>(3 drugs) | 4) any ACE/ARB plus ≥3 drugs<br>(4+ drugs) | 1) no ACE/ARB<br>(on 1 drug) | 2) no ACE/ARB<br>(on 2 drugs) | 3) no ACE/ARB<br>(on 3 drugs) | 4) no ACE/ARB<br>(on 4+ drugs) |
| Aldosterone antagonists <sup>†</sup>                                                        |                            | 0 (0)                                   | 2 (0.2)                                  | 20 (2.5)                                   | 0 (0)                        | 2 (0.2)                       | 1 (0.1)                       | 1 (0.1)                        |
| Alpha 1 adrenergic receptor agonist (selective; <b>α-blocker</b> )                          |                            | 2 (0.2)                                 | 8 (1)                                    | 26 (3.2)                                   | 1 (0.1)                      | 4 (0.5)                       | 1 (0.1)                       | 5 (0.6)                        |
| Angiotensin-converting enzyme (ACE) inhibitor/Angiotensin II receptor blockers (ARB)        | 32 (4)                     | 121 (15.1)                              | 199 (24.8)                               | 234 (29.2)                                 | 0 (0)                        | 0 (0)                         | 0 (0)                         | 0 (0)                          |

|                                                                                |          |            |            |            |          |          |          |
|--------------------------------------------------------------------------------|----------|------------|------------|------------|----------|----------|----------|
| Arteriolar vasodilators                                                        | 0 (0)    | 12 (1.5)   | 50 (6.2)   | 0 (0)      | 6 (0.7)  | 7 (0.9)  | 15 (1.9) |
| Autonomic ganglionic vasodilators                                              | 0 (0)    | 0 (0)      | 0 (0)      | 0 (0)      | 0 (0)    | 0 (0)    | 0 (0)    |
| Beta adrenergic blockers ( <b>β-blockers</b> )                                 | 17 (2.1) | 95 (11.8)  | 186 (23.2) | 21 (2.6)   | 39 (4.9) | 40 (5)   | 17 (2.1) |
| Calcium channel blocker ( <b>CCB</b> )-<br>dihydropyridine/non-dihydropyridine | 32 (4)   | 92 (11.5)  | 191 (23.8) | 19 (2.4)   | 23 (2.9) | 35 (4.4) | 15 (1.9) |
| Central alpha 2 adrenergic agonists                                            | 2 (0.2)  | 9 (1.1)    | 70 (8.7)   | 1 (0.1)    | 6 (0.7)  | 5 (0.6)  | 12 (1.5) |
| Diuretics: thiazide/thiazide-type                                              | 55 (6.9) | 117 (14.6) | 148 (18.5) | 4 (0.5)    | 20 (2.5) | 22 (2.7) | 11 (1.4) |
| Diuretics: loop                                                                | 13 (1.6) | 55 (6.9)   | 129 (16.1) | 7 (0.9)    | 19 (2.4) | 24 (3)   | 16 (2)   |
| Diuretics: potassium-sparing <sup>†</sup>                                      | 0 (0)    | 8 (1)      | 23 (2.9)   | 0 (0)      | 1 (0.1)  | 6 (0.7)  | 4 (0.5)  |
| Peripheral adrenergic neuron antagonist <sup>†</sup>                           | 0 (0)    | 0 (0)      | 0 (0)      | 0 (0)      | 0 (0)    | 0 (0)    | 0 (0)    |
| Renin inhibitors                                                               | 0 (0)    | 0 (0)      | 0 (0)      | 0 (0)      | 0 (0)    | 0 (0)    | 0 (0)    |
| <b>Total participants</b>                                                      | 32 (4)   | 121 (15.1) | 199 (24.8) | 234 (29.2) | 53 (6.6) | 60 (7.5) | 47 (5.9) |

<sup>†</sup>Not used alone/used in combination for chronic hypertension treatment.

**Table S4b. Patterns of antihypertensive drug utilization from Medicare Part-D drug coverage in 2007, by 3 arms and added-on drugs (Non-black)**

| Total Non-black Participants: N=4986                                                                       | N (%) of antihypertensive drug who received the study class drug |                                          |                                           |                                             | N (%) of antihypertensive drug who did not receive the study trial drug |                                |                                |                                 |
|------------------------------------------------------------------------------------------------------------|------------------------------------------------------------------|------------------------------------------|-------------------------------------------|---------------------------------------------|-------------------------------------------------------------------------|--------------------------------|--------------------------------|---------------------------------|
|                                                                                                            | 1) any diuretic<br>(1 drug)                                      | 2) any diuretic plus 1 drug<br>(2 drugs) | 3) any diuretic plus 2 drugs<br>(3 drugs) | 4) any diuretic plus ≥3 drugs<br>(4+ drugs) | 1) no diuretic<br>(on 1 drug)                                           | 2) no diuretic<br>(on 2 drugs) | 3) no diuretic<br>(on 3 drugs) | 4) no diuretic<br>(on 4+ drugs) |
| <b>Diuretic= Thiazide/thiazide-type</b><br>[Randomized to Chlorthalidone in trial: 2243 (45)]              |                                                                  |                                          |                                           |                                             |                                                                         |                                |                                |                                 |
| Aldosterone antagonists <sup>†</sup>                                                                       |                                                                  | 1 (0)                                    | 6 (0.3)                                   | 35 (1.6)                                    | 1 (0)                                                                   | 12 (0.5)                       | 19 (0.8)                       | 50 (2.2)                        |
| Alpha 1 adrenergic receptor agonist (selective; <b>α-blocker</b> )                                         |                                                                  | 2 (0.1)                                  | 15 (0.7)                                  | 49 (2.2)                                    | 6 (0.3)                                                                 | 16 (0.7)                       | 26 (1.2)                       | 34 (1.5)                        |
| Angiotensin-converting enzyme ( <b>ACE</b> ) inhibitor/<br>Angiotensin II receptor blockers ( <b>ARB</b> ) |                                                                  | 126 (5.6)                                | 261 (11.6)                                | 312 (13.9)                                  | 112 (5)                                                                 | 259 (11.5)                     | 244 (10.9)                     | 198 (8.8)                       |
| Arteriolar vasodilators                                                                                    |                                                                  | 2 (0.1)                                  | 7 (0.3)                                   | 29 (1.3)                                    | 0 (0)                                                                   | 2 (0.1)                        | 11 (0.5)                       | 41 (1.8)                        |
| Autonomic ganglionic vasodilators                                                                          |                                                                  | 0 (0)                                    | 0 (0)                                     | 0 (0)                                       | 0 (0)                                                                   | 0 (0)                          | 0 (0)                          | 0 (0)                           |
| Beta adrenergic blockers ( <b>β-blockers</b> )                                                             |                                                                  | 48 (2.1)                                 | 189 (8.4)                                 | 284 (12.7)                                  | 65 (2.9)                                                                | 201 (9)                        | 241 (10.7)                     | 198 (8.8)                       |
| Calcium channel blocker ( <b>CCB</b> )-<br>dihydropyridine/non-dihydropyridine                             |                                                                  | 17 (0.8)                                 | 110 (4.9)                                 | 257 (11.5)                                  | 50 (2.2)                                                                | 139 (6.2)                      | 146 (6.5)                      | 158 (7)                         |
| Central alpha 2 adrenergic agonists                                                                        |                                                                  | 4 (0.2)                                  | 11 (0.5)                                  | 61 (2.7)                                    | 3 (0.1)                                                                 | 18 (0.8)                       | 15 (0.7)                       | 64 (2.9)                        |
| Diuretics: thiazide/thiazide-type                                                                          | 50 (2.2)                                                         | 218 (9.7)                                | 327 (14.6)                                | 349 (15.6)                                  | 0 (0)                                                                   | 0 (0)                          | 0 (0)                          | 0 (0)                           |
| Diuretics: loop                                                                                            |                                                                  | 4 (0.2)                                  | 23 (1)                                    | 136 (6.1)                                   | 25 (1.1)                                                                | 116 (5.2)                      | 172 (7.7)                      | 193 (8.6)                       |
| Diuretics: potassium-sparing <sup>†</sup>                                                                  |                                                                  | 14 (0.6)                                 | 31 (1.4)                                  | 49 (2.2)                                    | 2 (0.1)                                                                 | 3 (0.1)                        | 2 (0.1)                        | 2 (0.1)                         |
| Peripheral adrenergic neuron antagonist <sup>†</sup>                                                       |                                                                  | 0 (0)                                    | 1 (0)                                     | 2 (0.1)                                     | 0 (0)                                                                   | 0 (0)                          | 0 (0)                          | 1 (0)                           |
| Renin inhibitors                                                                                           |                                                                  | 0 (0)                                    | 0 (0)                                     | 3 (0.1)                                     | 0 (0)                                                                   | 0 (0)                          | 0 (0)                          | 0 (0)                           |
| <b>Total participants</b>                                                                                  | 50 (2.2)                                                         | 218 (9.7)                                | 327 (14.6)                                | 349 (15.6)                                  | 264 (11.8)                                                              | 383 (17.1)                     | 292 (13)                       | 218 (9.7)                       |
| <b>Calcium channel blocker (CCB)</b><br>[Randomized to Amlodipine in trial: 1363 (27.3)]                   | 1) any CCB<br>(1 drug)                                           | 2) any CCB plus 1 drug                   | 3) any CCB plus 2 drugs                   | 4) any CCB plus ≥3 drugs                    | 1) no CCB<br>(on 1 drug)                                                | 2) no CCB<br>(on 2 drugs)      | 3) no CCB<br>(on 3 drugs)      | 4) no CCB<br>(on 4+ drugs)      |

|                                                                                             |                            | (2 drugs)                               | (3 drugs)                                | (4+ drugs)                                 |                              |                               |                               |                                |
|---------------------------------------------------------------------------------------------|----------------------------|-----------------------------------------|------------------------------------------|--------------------------------------------|------------------------------|-------------------------------|-------------------------------|--------------------------------|
| Aldosterone antagonists <sup>†</sup>                                                        |                            | 2 (0.1)                                 | 4 (0.3)                                  | 17 (1.2)                                   | 1 (0.1)                      | 4 (0.3)                       | 11 (0.8)                      | 16 (1.2)                       |
| Alpha 1 adrenergic receptor agonist (selective; <b>α-blocker</b> )                          |                            | 3 (0.2)                                 | 5 (0.4)                                  | 33 (2.4)                                   | 4 (0.3)                      | 6 (0.4)                       | 16 (1.2)                      | 16 (1.2)                       |
| Angiotensin-converting enzyme (ACE) inhibitor/Angiotensin II receptor blockers (ARB)        |                            | 72 (5.3)                                | 135 (9.9)                                | 223 (16.4)                                 | 70 (5.1)                     | 185 (13.6)                    | 148 (10.9)                    | 63 (4.6)                       |
| Arteriolar vasodilators                                                                     |                            | 0 (0)                                   | 5 (0.4)                                  | 28 (2.1)                                   | 0 (0)                        | 3 (0.2)                       | 4 (0.3)                       | 9 (0.7)                        |
| Autonomic ganglionic vasodilators                                                           |                            | 0 (0)                                   | 0 (0)                                    | 0 (0)                                      | 0 (0)                        | 0 (0)                         | 0 (0)                         | 0 (0)                          |
| Beta adrenergic blockers ( <b>β-blockers</b> )                                              |                            | 36 (2.6)                                | 86 (6.3)                                 | 202 (14.8)                                 | 53 (3.9)                     | 107 (7.9)                     | 143 (10.5)                    | 68 (5)                         |
| Calcium channel blocker (CCB)-dihydropyridine/non-dihydropyridine                           | 56 (4.1)                   | 136 (10)                                | 183 (13.4)                               | 242 (17.8)                                 | 0 (0)                        | 0 (0)                         | 0 (0)                         | 0 (0)                          |
| Central alpha 2 adrenergic agonists                                                         |                            | 1 (0.1)                                 | 10 (0.7)                                 | 44 (3.2)                                   | 0 (0)                        | 3 (0.2)                       | 11 (0.8)                      | 11 (0.8)                       |
| Diuretics: thiazide/thiazide-type                                                           |                            | 10 (0.7)                                | 71 (5.2)                                 | 152 (11.2)                                 | 18 (1.3)                     | 107 (7.9)                     | 105 (7.7)                     | 48 (3.5)                       |
| Diuretics: loop                                                                             |                            | 11 (0.8)                                | 44 (3.2)                                 | 136 (10)                                   | 13 (1)                       | 66 (4.8)                      | 75 (5.5)                      | 53 (3.9)                       |
| Diuretics: potassium-sparing <sup>†</sup>                                                   |                            | 1 (0.1)                                 | 6 (0.4)                                  | 19 (1.4)                                   | 0 (0)                        | 6 (0.4)                       | 11 (0.8)                      | 7 (0.5)                        |
| Peripheral adrenergic neuron antagonist <sup>†</sup>                                        |                            | 0 (0)                                   | 0 (0)                                    | 0 (0)                                      | 0 (0)                        | 1 (0.1)                       | 1 (0.1)                       | 0 (0)                          |
| Renin inhibitors                                                                            |                            | 0 (0)                                   | 0 (0)                                    | 2 (0.1)                                    | 0 (0)                        | 0 (0)                         | 0 (0)                         | 0 (0)                          |
| <b>Total participants</b>                                                                   | <b>56 (4.1)</b>            | <b>136 (10)</b>                         | <b>183 (13.4)</b>                        | <b>242 (17.8)</b>                          | <b>159 (11.7)</b>            | <b>244 (17.9)</b>             | <b>175 (12.8)</b>             | <b>70 (5.1)</b>                |
| <b>Angiotensin-converting enzyme (ACE) inhibitor/Angiotensin II receptor blockers (ARB)</b> |                            |                                         |                                          |                                            |                              |                               |                               |                                |
| [Randomized to Lisinopril in trial: 1380 (27.7)]                                            | 1) any ACE/ARB<br>(1 drug) | 2) any ACE/ARB plus 1 drug<br>(2 drugs) | 3) any ACE/ARB plus 2 drugs<br>(3 drugs) | 4) any ACE/ARB plus ≥3 drugs<br>(4+ drugs) | 1) no ACE/ARB<br>(on 1 drug) | 2) no ACE/ARB<br>(on 2 drugs) | 3) no ACE/ARB<br>(on 3 drugs) | 4) no ACE/ARB<br>(on 4+ drugs) |
| Aldosterone antagonists <sup>†</sup>                                                        |                            | 0 (0)                                   | 5 (0.4)                                  | 43 (3.1)                                   | 3 (0.2)                      | 8 (0.6)                       | 11 (0.8)                      | 5 (0.4)                        |
| Alpha 1 adrenergic receptor agonist (selective; <b>α-blocker</b> )                          |                            | 4 (0.3)                                 | 16 (1.2)                                 | 42 (3)                                     | 4 (0.3)                      | 8 (0.6)                       | 6 (0.4)                       | 1 (0.1)                        |
| Angiotensin-converting enzyme (ACE) inhibitor/Angiotensin II receptor blockers (ARB)        | 94 (6.8)                   | 261 (18.9)                              | 327 (23.7)                               | 294 (21.3)                                 | 0 (0)                        | 0 (0)                         | 0 (0)                         | 0 (0)                          |

|                                                                                |                 |                   |                   |                   |                  |                  |                 |
|--------------------------------------------------------------------------------|-----------------|-------------------|-------------------|-------------------|------------------|------------------|-----------------|
| Arteriolar vasodilators                                                        | 1 (0.1)         | 7 (0.5)           | 38 (2.8)          | 1 (0.1)           | 7 (0.5)          | 5 (0.4)          | 4 (0.3)         |
| Autonomic ganglionic vasodilators                                              | 0 (0)           | 0 (0)             | 0 (0)             | 0 (0)             | 0 (0)            | 0 (0)            | 0 (0)           |
| Beta adrenergic blockers ( <b>β-blockers</b> )                                 | 75 (5.4)        | 197 (14.3)        | 248 (18)          | 52 (3.8)          | 66 (4.8)         | 51 (3.7)         | 18 (1.3)        |
| Calcium channel blocker ( <b>CCB</b> )-<br>dihydropyridine/non-dihydropyridine | 66 (4.8)        | 139 (10.1)        | 217 (15.7)        | 33 (2.4)          | 47 (3.4)         | 44 (3.2)         | 15 (1.1)        |
| Central alpha 2 adrenergic agonists                                            | 4 (0.3)         | 20 (1.4)          | 65 (4.7)          | 3 (0.2)           | 9 (0.7)          | 8 (0.6)          | 5 (0.4)         |
| Diuretics: thiazide/thiazide-type                                              | 78 (5.7)        | 145 (10.5)        | 186 (13.5)        | 14 (1)            | 27 (2)           | 36 (2.6)         | 14 (1)          |
| Diuretics: loop                                                                | 33 (2.4)        | 117 (8.5)         | 174 (12.6)        | 15 (1.1)          | 33 (2.4)         | 37 (2.7)         | 10 (0.7)        |
| Diuretics: potassium-sparing <sup>†</sup>                                      | 0 (0)           | 8 (0.6)           | 23 (1.7)          | 1 (0.1)           | 1 (0.1)          | 11 (0.8)         | 6 (0.4)         |
| Peripheral adrenergic neuron antagonist <sup>†</sup>                           | 0 (0)           | 0 (0)             | 3 (0.2)           | 0 (0)             | 0 (0)            | 0 (0)            | 0 (0)           |
| Renin inhibitors                                                               | 0 (0)           | 0 (0)             | 2 (0.1)           | 1 (0.1)           | 0 (0)            | 1 (0.1)          | 0 (0)           |
| <b>Total participants</b>                                                      | <b>94 (6.8)</b> | <b>261 (18.9)</b> | <b>327 (23.7)</b> | <b>294 (21.3)</b> | <b>127 (9.2)</b> | <b>103 (7.5)</b> | <b>70 (5.1)</b> |

<sup>†</sup>Not used alone/used in combination for chronic hypertension treatment.

**Table S4c. Patterns of antihypertensive drug utilization from Medicare Part-D drug coverage in 2007, by 3 arms and added-on drugs (Male)**

| Total Male Participants: N=2812                                                                            | N (%) of antihypertensive drug who received the study class drug |                                          |                                           |                                             | N (%) of antihypertensive drug who did not receive the study trial drug |                                |                                |                                 |
|------------------------------------------------------------------------------------------------------------|------------------------------------------------------------------|------------------------------------------|-------------------------------------------|---------------------------------------------|-------------------------------------------------------------------------|--------------------------------|--------------------------------|---------------------------------|
|                                                                                                            | 1) any diuretic<br>(1 drug)                                      | 2) any diuretic plus 1 drug<br>(2 drugs) | 3) any diuretic plus 2 drugs<br>(3 drugs) | 4) any diuretic plus ≥3 drugs<br>(4+ drugs) | 1) no diuretic<br>(on 1 drug)                                           | 2) no diuretic<br>(on 2 drugs) | 3) no diuretic<br>(on 3 drugs) | 4) no diuretic<br>(on 4+ drugs) |
| <b>Diuretic= Thiazide/thiazide-type</b><br>[Randomized to Chlorthalidone in trial: 1283 (45.6)]            |                                                                  |                                          |                                           |                                             |                                                                         |                                |                                |                                 |
| Aldosterone antagonists †                                                                                  |                                                                  | 1 (0.1)                                  | 2 (0.2)                                   | 17 (1.3)                                    | 0 (0)                                                                   | 3 (0.2)                        | 10 (0.8)                       | 32 (2.5)                        |
| Alpha 1 adrenergic receptor agonist (selective; <b>α-blocker</b> )                                         |                                                                  | 2 (0.2)                                  | 17 (1.3)                                  | 46 (3.6)                                    | 6 (0.5)                                                                 | 14 (1.1)                       | 30 (2.3)                       | 36 (2.8)                        |
| Angiotensin-converting enzyme ( <b>ACE</b> ) inhibitor/<br>Angiotensin II receptor blockers ( <b>ARB</b> ) |                                                                  | 57 (4.4)                                 | 143 (11.1)                                | 180 (14)                                    | 65 (5.1)                                                                | 142 (11.1)                     | 135 (10.5)                     | 119 (9.3)                       |
| Arteriolar vasodilators                                                                                    |                                                                  | 0 (0)                                    | 3 (0.2)                                   | 23 (1.8)                                    | 0 (0)                                                                   | 1 (0.1)                        | 11 (0.9)                       | 33 (2.6)                        |
| Autonomic ganglionic vasodilators                                                                          |                                                                  | 0 (0)                                    | 0 (0)                                     | 0 (0)                                       | 0 (0)                                                                   | 0 (0)                          | 0 (0)                          | 0 (0)                           |
| Beta adrenergic blockers ( <b>β-blockers</b> )                                                             |                                                                  | 25 (1.9)                                 | 93 (7.2)                                  | 167 (13)                                    | 49 (3.8)                                                                | 107 (8.3)                      | 131 (10.2)                     | 119 (9.3)                       |
| Calcium channel blocker ( <b>CCB</b> )-<br>dihydropyridine/non-dihydropyridine                             |                                                                  | 10 (0.8)                                 | 62 (4.8)                                  | 139 (10.8)                                  | 27 (2.1)                                                                | 68 (5.3)                       | 81 (6.3)                       | 96 (7.5)                        |
| Central alpha 2 adrenergic agonists                                                                        |                                                                  | 0 (0)                                    | 7 (0.5)                                   | 38 (3)                                      | 4 (0.3)                                                                 | 6 (0.5)                        | 9 (0.7)                        | 41 (3.2)                        |
| Diuretics: thiazide/thiazide-type                                                                          | 32 (2.5)                                                         | 104 (8.1)                                | 176 (13.7)                                | 202 (15.7)                                  | 0 (0)                                                                   | 0 (0)                          | 0 (0)                          | 0 (0)                           |
| Diuretics: loop                                                                                            |                                                                  | 1 (0.1)                                  | 12 (0.9)                                  | 77 (6)                                      | 11 (0.9)                                                                | 57 (4.4)                       | 88 (6.9)                       | 114 (8.9)                       |
| Diuretics: potassium-sparing †                                                                             |                                                                  | 8 (0.6)                                  | 13 (1)                                    | 31 (2.4)                                    | 0 (0)                                                                   | 2 (0.2)                        | 3 (0.2)                        | 4 (0.3)                         |
| Peripheral adrenergic neuron antagonist †                                                                  |                                                                  | 0 (0)                                    | 0 (0)                                     | 1 (0.1)                                     | 0 (0)                                                                   | 0 (0)                          | 0 (0)                          | 0 (0)                           |
| Renin inhibitors                                                                                           |                                                                  | 0 (0)                                    | 0 (0)                                     | 1 (0.1)                                     | 0 (0)                                                                   | 0 (0)                          | 0 (0)                          | 0 (0)                           |
| <b>Total participants</b>                                                                                  | <b>32 (2.5)</b>                                                  | <b>104 (8.1)</b>                         | <b>176 (13.7)</b>                         | <b>202 (15.7)</b>                           | <b>162 (12.6)</b>                                                       | <b>200 (15.6)</b>              | <b>166 (12.9)</b>              | <b>134 (10.4)</b>               |
| <b>Calcium channel blocker (CCB)</b><br>[Randomized to Amlodipine in trial: 747 (26.6)]                    | 1) any CCB<br>(1 drug)                                           | 2) any CCB plus 1 drug<br>(2 drugs)      | 3) any CCB plus 2 drugs<br>(3 drugs)      | 4) any CCB plus ≥3 drugs<br>(4+ drugs)      | 1) no CCB<br>(on 1 drug)                                                | 2) no CCB<br>(on 2 drugs)      | 3) no CCB<br>(on 3 drugs)      | 4) no CCB<br>(on 4+ drugs)      |

|                                                                                                        |                 |                  |                   |                   |                  |                   |                  |               |
|--------------------------------------------------------------------------------------------------------|-----------------|------------------|-------------------|-------------------|------------------|-------------------|------------------|---------------|
| Aldosterone antagonists †                                                                              | 0 (0)           | 1 (0.1)          | 11 (1.5)          | 1 (0.1)           | 2 (0.3)          | 4 (0.5)           | 8 (1.1)          |               |
| Alpha 1 adrenergic receptor agonist (selective; <b>α-blocker</b> )                                     | 4 (0.5)         | 6 (0.8)          | 29 (3.9)          | 4 (0.5)           | 9 (1.2)          | 20 (2.7)          | 19 (2.5)         |               |
| Angiotensin-converting enzyme ( <b>ACE</b> ) inhibitor/Angiotensin II receptor blockers ( <b>ARB</b> ) | 47 (6.3)        | 71 (9.5)         | 125 (16.7)        | 32 (4.3)          | 73 (9.8)         | 74 (9.9)          | 35 (4.7)         |               |
| Arteriolar vasodilators                                                                                | 0 (0)           | 4 (0.5)          | 20 (2.7)          | 0 (0)             | 2 (0.3)          | 1 (0.1)           | 5 (0.7)          |               |
| Autonomic ganglionic vasodilators                                                                      | 0 (0)           | 0 (0)            | 0 (0)             | 0 (0)             | 0 (0)            | 0 (0)             | 0 (0)            |               |
| Beta adrenergic blockers ( <b>β-blockers</b> )                                                         | 18 (2.4)        | 45 (6)           | 121 (16.2)        | 29 (3.9)          | 52 (7)           | 60 (8)            | 34 (4.6)         |               |
| Calcium channel blocker ( <b>CCB</b> )-dihydropyridine/non-dihydropyridine                             | 29 (3.9)        | 83 (11.1)        | 100 (13.4)        | 144 (19.3)        | 0 (0)            | 0 (0)             | 0 (0)            |               |
| Central alpha 2 adrenergic agonists                                                                    | 1 (0.1)         | 7 (0.9)          | 32 (4.3)          | 0 (0)             | 4 (0.5)          | 8 (1.1)           | 5 (0.7)          |               |
| Diuretics: thiazide/thiazide-type                                                                      | 9 (1.2)         | 35 (4.7)         | 93 (12.4)         | 9 (1.2)           | 54 (7.2)         | 51 (6.8)          | 21 (2.8)         |               |
| Diuretics: loop                                                                                        | 3 (0.4)         | 26 (3.5)         | 74 (9.9)          | 9 (1.2)           | 18 (2.4)         | 41 (5.5)          | 30 (4)           |               |
| Diuretics: potassium-sparing†                                                                          | 1 (0.1)         | 5 (0.7)          | 12 (1.6)          | 0 (0)             | 5 (0.7)          | 4 (0.5)           | 5 (0.7)          |               |
| Peripheral adrenergic neuron antagonist†                                                               | 0 (0)           | 0 (0)            | 0 (0)             | 0 (0)             | 1 (0.1)          | 1 (0.1)           | 0 (0)            |               |
| Renin inhibitors                                                                                       | 0 (0)           | 0 (0)            | 1 (0.1)           | 0 (0)             | 0 (0)            | 0 (0)             | 0 (0)            |               |
| <b>Total participants</b>                                                                              | <b>29 (3.9)</b> | <b>83 (11.1)</b> | <b>100 (13.4)</b> | <b>144 (19.3)</b> | <b>84 (11.2)</b> | <b>110 (14.7)</b> | <b>88 (11.8)</b> | <b>37 (5)</b> |

| <b>Angiotensin-converting enzyme (ACE) inhibitor/<br/>Angiotensin II receptor blockers (ARB)</b><br>[Randomized to Lisinopril in trial: 782 (27.8)] | 1) any<br>ACE/ARB<br>(1 drug) | 2) any<br>ACE/ARB<br>plus 1 drug<br>(2 drugs) | 3) any<br>ACE/ARB<br>plus 2 drugs<br>(3 drugs) | 4) any<br>ACE/ARB<br>plus ≥3<br>drugs<br>(4+ drugs) | 1) no<br>ACE/ARB<br>(on 1 drug) | 2) no<br>ACE/ARB<br>(on 2 drugs) | 3) no<br>ACE/ARB<br>(on 3 drugs) | 4) no<br>ACE/ARB<br>(on 4+<br>drugs) |
|-----------------------------------------------------------------------------------------------------------------------------------------------------|-------------------------------|-----------------------------------------------|------------------------------------------------|-----------------------------------------------------|---------------------------------|----------------------------------|----------------------------------|--------------------------------------|
| Aldosterone antagonists †                                                                                                                           |                               | 0 (0)                                         | 3 (0.4)                                        | 31 (4)                                              | 2 (0.3)                         | 6 (0.8)                          | 8 (1)                            | 3 (0.4)                              |
| Alpha 1 adrenergic receptor agonist (selective; <b>α-blocker</b> )                                                                                  |                               | 6 (0.8)                                       | 22 (2.8)                                       | 44 (5.6)                                            | 5 (0.6)                         | 12 (1.5)                         | 5 (0.6)                          | 4 (0.5)                              |
| Angiotensin-converting enzyme ( <b>ACE</b> ) inhibitor/<br>Angiotensin II receptor blockers ( <b>ARB</b> )                                          | 49 (6.3)                      | 130 (16.6)                                    | 167 (21.4)                                     | 176 (22.5)                                          | 0 (0)                           | 0 (0)                            | 0 (0)                            | 0 (0)                                |

|                                                                                |          |            |            |            |           |          |          |
|--------------------------------------------------------------------------------|----------|------------|------------|------------|-----------|----------|----------|
| Arteriolar vasodilators                                                        | 0 (0)    | 7 (0.9)    | 33 (4.2)   | 0 (0)      | 8 (1)     | 6 (0.8)  | 8 (1)    |
| Autonomic ganglionic vasodilators                                              | 0 (0)    | 0 (0)      | 0 (0)      | 0 (0)      | 0 (0)     | 0 (0)    | 0 (0)    |
| Beta adrenergic blockers ( <b>β-blockers</b> )                                 | 42 (5.4) | 107 (13.7) | 148 (18.9) | 38 (4.9)   | 37 (4.7)  | 25 (3.2) | 15 (1.9) |
| Calcium channel blocker ( <b>CCB</b> )-<br>dihydropyridine/non-dihydropyridine | 38 (4.9) | 66 (8.4)   | 128 (16.4) | 16 (2)     | 20 (2.6)  | 24 (3.1) | 9 (1.2)  |
| Central alpha 2 adrenergic agonists                                            | 2 (0.3)  | 9 (1.2)    | 38 (4.9)   | 2 (0.3)    | 5 (0.6)   | 3 (0.4)  | 7 (0.9)  |
| Diuretics: thiazide/thiazide-type                                              | 32 (4.1) | 61 (7.8)   | 101 (12.9) | 7 (0.9)    | 20 (2.6)  | 18 (2.3) | 9 (1.2)  |
| Diuretics: loop                                                                | 10 (1.3) | 56 (7.2)   | 105 (13.4) | 9 (1.2)    | 20 (2.6)  | 21 (2.7) | 7 (0.9)  |
| Diuretics: potassium-sparing <sup>†</sup>                                      | 0 (0)    | 3 (0.4)    | 16 (2)     | 0 (0)      | 0 (0)     | 4 (0.5)  | 6 (0.8)  |
| Peripheral adrenergic neuron antagonist <sup>†</sup>                           | 0 (0)    | 0 (0)      | 3 (0.4)    | 0 (0)      | 0 (0)     | 0 (0)    | 0 (0)    |
| Renin inhibitors                                                               | 0 (0)    | 0 (0)      | 1 (0.1)    | 1 (0.1)    | 0 (0)     | 0 (0)    | 0 (0)    |
| <b>Total participants</b>                                                      | 49 (6.3) | 130 (16.6) | 167 (21.4) | 176 (22.5) | 80 (10.2) | 64 (8.2) | 38 (4.9) |

<sup>†</sup>Not used alone/used in combination for chronic hypertension treatment.



**Table S4d. Patterns of antihypertensive drug utilization from Medicare Part-D drug coverage in 2007, by 3 arms and added-on drugs (Female)**

| Total Female Participants: N=5198                                                                          | N (%) of antihypertensive drug who received the study class drug |                                          |                                           |                                             | N (%) of antihypertensive drug who did not receive the study trial drug |                                |                                |                                 |
|------------------------------------------------------------------------------------------------------------|------------------------------------------------------------------|------------------------------------------|-------------------------------------------|---------------------------------------------|-------------------------------------------------------------------------|--------------------------------|--------------------------------|---------------------------------|
|                                                                                                            | 1) any diuretic<br>(1 drug)                                      | 2) any diuretic plus 1 drug<br>(2 drugs) | 3) any diuretic plus 2 drugs<br>(3 drugs) | 4) any diuretic plus ≥3 drugs<br>(4+ drugs) | 1) no diuretic<br>(on 1 drug)                                           | 2) no diuretic<br>(on 2 drugs) | 3) no diuretic<br>(on 3 drugs) | 4) no diuretic<br>(on 4+ drugs) |
| <b>Diuretic= Thiazide/thiazide-type</b><br>[Randomized to Chlorthalidone in trial: 2355 (45.3)]            |                                                                  |                                          |                                           |                                             |                                                                         |                                |                                |                                 |
| Aldosterone antagonists †                                                                                  |                                                                  | 0 (0)                                    | 5 (0.2)                                   | 34 (1.4)                                    | 3 (0.1)                                                                 | 10 (0.4)                       | 20 (0.8)                       | 50 (2.1)                        |
| Alpha 1 adrenergic receptor agonist (selective; <b>α-blocker</b> )                                         |                                                                  | 0 (0)                                    | 4 (0.2)                                   | 27 (1.1)                                    | 1 (0)                                                                   | 3 (0.1)                        | 4 (0.2)                        | 11 (0.5)                        |
| Angiotensin-converting enzyme ( <b>ACE</b> ) inhibitor/<br>Angiotensin II receptor blockers ( <b>ARB</b> ) |                                                                  | 145 (6.2)                                | 289 (12.3)                                | 391 (16.6)                                  | 97 (4.1)                                                                | 225 (9.6)                      | 236 (10)                       | 219 (9.3)                       |
| Arteriolar vasodilators                                                                                    |                                                                  | 2 (0.1)                                  | 8 (0.3)                                   | 36 (1.5)                                    | 1 (0)                                                                   | 3 (0.1)                        | 10 (0.4)                       | 46 (2)                          |
| Autonomic ganglionic vasodilators                                                                          |                                                                  | 0 (0)                                    | 0 (0)                                     | 0 (0)                                       | 0 (0)                                                                   | 0 (0)                          | 0 (0)                          | 0 (0)                           |
| Beta adrenergic blockers ( <b>β-blockers</b> )                                                             |                                                                  | 57 (2.4)                                 | 181 (7.7)                                 | 341 (14.5)                                  | 40 (1.7)                                                                | 172 (7.3)                      | 222 (9.4)                      | 211 (9)                         |
| Calcium channel blocker ( <b>CCB</b> )-<br>dihydropyridine/non-dihydropyridine                             |                                                                  | 24 (1)                                   | 158 (6.7)                                 | 336 (14.3)                                  | 79 (3.4)                                                                | 163 (6.9)                      | 171 (7.3)                      | 188 (8)                         |
| Central alpha 2 adrenergic agonists                                                                        |                                                                  | 6 (0.3)                                  | 10 (0.4)                                  | 83 (3.5)                                    | 4 (0.2)                                                                 | 21 (0.9)                       | 30 (1.3)                       | 71 (3)                          |
| Diuretics: thiazide/thiazide-type                                                                          | 50 (2.1)                                                         | 262 (11.1)                               | 363 (15.4)                                | 424 (18)                                    | 0 (0)                                                                   | 0 (0)                          | 0 (0)                          | 0 (0)                           |
| Diuretics: loop                                                                                            |                                                                  | 8 (0.3)                                  | 32 (1.4)                                  | 155 (6.6)                                   | 26 (1.1)                                                                | 123 (5.2)                      | 185 (7.9)                      | 207 (8.8)                       |
| Diuretics: potassium-sparing†                                                                              |                                                                  | 20 (0.8)                                 | 38 (1.6)                                  | 60 (2.5)                                    | 3 (0.1)                                                                 | 4 (0.2)                        | 1 (0)                          | 2 (0.1)                         |
| Peripheral adrenergic neuron antagonist†                                                                   |                                                                  | 0 (0)                                    | 1 (0)                                     | 2 (0.1)                                     | 0 (0)                                                                   | 0 (0)                          | 0 (0)                          | 2 (0.1)                         |
| Renin inhibitors                                                                                           |                                                                  | 0 (0)                                    | 0 (0)                                     | 10 (0.4)                                    | 0 (0)                                                                   | 0 (0)                          | 0 (0)                          | 0 (0)                           |
| <b>Total participants</b>                                                                                  | 50 (2.1)                                                         | 262 (11.1)                               | 363 (15.4)                                | 424 (18)                                    | 254 (10.8)                                                              | 362 (15.4)                     | 293 (12.4)                     | 237 (10.1)                      |
| <b>Calcium channel blocker (CCB)</b><br>[Randomized to Amlodipine in trial: 1443 (27.8)]                   | 1) any CCB<br>(1 drug)                                           | 2) any CCB plus 1 drug<br>(2 drugs)      | 3) any CCB plus 2 drugs<br>(3 drugs)      | 4) any CCB plus ≥3 drugs<br>(4+ drugs)      | 1) no CCB<br>(on 1 drug)                                                | 2) no CCB<br>(on 2 drugs)      | 3) no CCB<br>(on 3 drugs)      | 4) no CCB<br>(on 4+ drugs)      |

|                                                                                                                                                      |                               |                                               |                                                |                                                     |                                 |                                  |                                  |                                      |
|------------------------------------------------------------------------------------------------------------------------------------------------------|-------------------------------|-----------------------------------------------|------------------------------------------------|-----------------------------------------------------|---------------------------------|----------------------------------|----------------------------------|--------------------------------------|
| Aldosterone antagonists †                                                                                                                            |                               | 2 (0.1)                                       | 4 (0.3)                                        | 21 (1.5)                                            | 0 (0)                           | 4 (0.3)                          | 12 (0.8)                         | 17 (1.2)                             |
| Alpha 1 adrenergic receptor agonist (selective; <b>α-blocker</b> )                                                                                   |                               | 0 (0)                                         | 1 (0.1)                                        | 24 (1.7)                                            | 1 (0.1)                         | 1 (0.1)                          | 1 (0.1)                          | 5 (0.3)                              |
| Angiotensin-converting enzyme ( <b>ACE</b> ) inhibitor/Angiotensin II receptor blockers ( <b>ARB</b> )                                               |                               | 67 (4.6)                                      | 166 (11.5)                                     | 303 (21)                                            | 67 (4.6)                        | 186 (12.9)                       | 146 (10.1)                       | 65 (4.5)                             |
| Arteriolar vasodilators                                                                                                                              |                               | 0 (0)                                         | 6 (0.4)                                        | 48 (3.3)                                            | 0 (0)                           | 4 (0.3)                          | 6 (0.4)                          | 16 (1.1)                             |
| Autonomic ganglionic vasodilators                                                                                                                    |                               | 0 (0)                                         | 0 (0)                                          | 0 (0)                                               | 0 (0)                           | 0 (0)                            | 0 (0)                            | 0 (0)                                |
| Beta adrenergic blockers ( <b>β-blockers</b> )                                                                                                       |                               | 34 (2.4)                                      | 96 (6.7)                                       | 265 (18.4)                                          | 42 (2.9)                        | 93 (6.4)                         | 141 (9.8)                        | 69 (4.8)                             |
| Calcium channel blocker ( <b>CCB</b> )-dihydropyridine/non-dihydropyridine                                                                           | 64 (4.4)                      | 140 (9.7)                                     | 222 (15.4)                                     | 327 (22.7)                                          | 0 (0)                           | 0 (0)                            | 0 (0)                            | 0 (0)                                |
| Central alpha 2 adrenergic agonists                                                                                                                  |                               | 4 (0.3)                                       | 10 (0.7)                                       | 73 (5.1)                                            | 1 (0.1)                         | 4 (0.3)                          | 16 (1.1)                         | 20 (1.4)                             |
| Diuretics: thiazide/thiazide-type                                                                                                                    |                               | 19 (1.3)                                      | 100 (6.9)                                      | 208 (14.4)                                          | 17 (1.2)                        | 116 (8)                          | 103 (7.1)                        | 55 (3.8)                             |
| Diuretics: loop                                                                                                                                      |                               | 14 (1)                                        | 54 (3.7)                                       | 176 (12.2)                                          | 14 (1)                          | 68 (4.7)                         | 72 (5)                           | 53 (3.7)                             |
| Diuretics: potassium-sparing†                                                                                                                        |                               | 0 (0)                                         | 7 (0.5)                                        | 28 (1.9)                                            | 0 (0)                           | 4 (0.3)                          | 12 (0.8)                         | 7 (0.5)                              |
| Peripheral adrenergic neuron antagonist†                                                                                                             |                               | 0 (0)                                         | 0 (0)                                          | 0 (0)                                               | 0 (0)                           | 0 (0)                            | 0 (0)                            | 0 (0)                                |
| Renin inhibitors                                                                                                                                     |                               | 0 (0)                                         | 0 (0)                                          | 1 (0.1)                                             | 0 (0)                           | 0 (0)                            | 1 (0.1)                          | 1 (0.1)                              |
| <b>Total participants</b>                                                                                                                            | <b>64 (4.4)</b>               | <b>140 (9.7)</b>                              | <b>222 (15.4)</b>                              | <b>327 (22.7)</b>                                   | <b>142 (9.8)</b>                | <b>240 (16.6)</b>                | <b>170 (11.8)</b>                | <b>75 (5.2)</b>                      |
| <b>Angiotensin-converting enzyme (ACE) inhibitor/<br/>Angiotensin II receptor blockers (ARB)</b><br>[Randomized to Lisinopril in trial: 1400 (26.9)] | 1) any<br>ACE/ARB<br>(1 drug) | 2) any<br>ACE/ARB<br>plus 1 drug<br>(2 drugs) | 3) any<br>ACE/ARB<br>plus 2 drugs<br>(3 drugs) | 4) any<br>ACE/ARB<br>plus ≥3<br>drugs<br>(4+ drugs) | 1) no<br>ACE/ARB<br>(on 1 drug) | 2) no<br>ACE/ARB<br>(on 2 drugs) | 3) no<br>ACE/ARB<br>(on 3 drugs) | 4) no<br>ACE/ARB<br>(on 4+<br>drugs) |
| Aldosterone antagonists †                                                                                                                            |                               | 0 (0)                                         | 4 (0.3)                                        | 32 (2.3)                                            | 1 (0.1)                         | 4 (0.3)                          | 4 (0.3)                          | 3 (0.2)                              |
| Alpha 1 adrenergic receptor agonist (selective; <b>α-blocker</b> )                                                                                   |                               | 0 (0)                                         | 2 (0.1)                                        | 24 (1.7)                                            | 0 (0)                           | 0 (0)                            | 2 (0.1)                          | 2 (0.1)                              |
| Angiotensin-converting enzyme ( <b>ACE</b> ) inhibitor/<br>Angiotensin II receptor blockers ( <b>ARB</b> )                                           | 77 (5.5)                      | 252 (18)                                      | 359 (25.6)                                     | 352 (25.1)                                          | 0 (0)                           | 0 (0)                            | 0 (0)                            | 0 (0)                                |

|                                                                                |           |            |            |            |           |          |          |
|--------------------------------------------------------------------------------|-----------|------------|------------|------------|-----------|----------|----------|
| Arteriolar vasodilators                                                        | 1 (0.1)   | 12 (0.9)   | 55 (3.9)   | 1 (0.1)    | 5 (0.4)   | 6 (0.4)  | 11 (0.8) |
| Autonomic ganglionic vasodilators                                              | 0 (0)     | 0 (0)      | 0 (0)      | 0 (0)      | 0 (0)     | 0 (0)    | 0 (0)    |
| Beta adrenergic blockers ( <b>β-blockers</b> )                                 | 50 (3.6)  | 185 (13.2) | 286 (20.4) | 35 (2.5)   | 68 (4.9)  | 66 (4.7) | 20 (1.4) |
| Calcium channel blocker ( <b>CCB</b> )-<br>dihydropyridine/non-dihydropyridine | 60 (4.3)  | 165 (11.8) | 280 (20)   | 36 (2.6)   | 50 (3.6)  | 55 (3.9) | 21 (1.5) |
| Central alpha 2 adrenergic agonists                                            | 4 (0.3)   | 20 (1.4)   | 97 (6.9)   | 2 (0.1)    | 10 (0.7)  | 10 (0.7) | 10 (0.7) |
| Diuretics: thiazide/thiazide-type                                              | 101 (7.2) | 201 (14.4) | 233 (16.6) | 11 (0.8)   | 27 (1.9)  | 40 (2.9) | 16 (1.1) |
| Diuretics: loop                                                                | 36 (2.6)  | 116 (8.3)  | 198 (14.1) | 13 (0.9)   | 32 (2.3)  | 40 (2.9) | 19 (1.4) |
| Diuretics: potassium-sparing <sup>†</sup>                                      | 0 (0)     | 13 (0.9)   | 30 (2.1)   | 1 (0.1)    | 2 (0.1)   | 13 (0.9) | 4 (0.3)  |
| Peripheral adrenergic neuron antagonist <sup>†</sup>                           | 0 (0)     | 0 (0)      | 0 (0)      | 0 (0)      | 0 (0)     | 0 (0)    | 0 (0)    |
| Renin inhibitors                                                               | 0 (0)     | 0 (0)      | 1 (0.1)    | 0 (0)      | 0 (0)     | 1 (0.1)  | 0 (0)    |
| <b>Total participants</b>                                                      | 77 (5.5)  | 252 (18)   | 359 (25.6) | 352 (25.1) | 100 (7.1) | 99 (7.1) | 79 (5.6) |

<sup>†</sup>Not used alone/used in combination for chronic hypertension treatment.

**Table S5. Cumulative Incidence for morbidity/mortality outcomes between 2007 and 2017 by the changing patterns of antihypertensive drugs as of 2007**

| <b>Total Participants: N=8007</b>                    | <b>10-year rate per 100 persons in those who received the study trial class drug as of 2007</b> |                             |                              |                               | <b>10-year rate per 100 persons in those who did not receive the study trial drug as of 2007</b> |                |                |                |             |
|------------------------------------------------------|-------------------------------------------------------------------------------------------------|-----------------------------|------------------------------|-------------------------------|--------------------------------------------------------------------------------------------------|----------------|----------------|----------------|-------------|
| <b>Diuretic= Thiazide/thiazide-type</b>              | 1) any diuretic                                                                                 | 2) any diuretic plus 1 drug | 3) any diuretic plus 2 drugs | 4) any diuretic plus ≥3 drugs | 1) no diuretic                                                                                   | 2) no diuretic | 3) no diuretic | 4) no diuretic |             |
| [Randomized to Chlorthalidone in trial: 3637 (45.4)] | (1 drug)                                                                                        | (2 drugs)                   | (3 drugs)                    | (4+ drugs)                    | (on 1 drug)                                                                                      | (on 2 drugs)   | (on 3 drugs)   | (on 4+ drugs)  | 5) No Drugs |
| <b>Mortality Outcomes:</b>                           |                                                                                                 |                             |                              |                               |                                                                                                  |                |                |                |             |
| <b>All-cause mortality</b>                           | 24.4                                                                                            | 22.4                        | 22.4                         | 30.2                          | 25.3                                                                                             | 29.5           | 35.5           | 48.2           | 23.5        |
| <b>CVD mortality</b>                                 | 11.8                                                                                            | 10.3                        | 10.1                         | 13.3                          | 11.3                                                                                             | 13.6           | 17.5           | 27.3           | 9.5         |
| CHD mortality                                        | 6.8                                                                                             | 4.5                         | 3.8                          | 6.0                           | 3.8                                                                                              | 5.4            | 9.7            | 14.3           | 4.7         |
| Stroke mortality                                     | 1.3                                                                                             | 1.9                         | 2.0                          | 2.0                           | 2.2                                                                                              | 2.1            | 2.6            | 4.1            | 2.1         |
| Heart failure mortality                              | 1.2                                                                                             | 0.9                         | 1.2                          | 1.9                           | 1.1                                                                                              | 1.7            | 1.7            | 2.9            | 0.5         |
| Other CVD mortality                                  | 2.9                                                                                             | 3.5                         | 3.3                          | 3.9                           | 4.7                                                                                              | 5.2            | 4.5            | 8.9            | 2.6         |
| <b>Non-CVD Mortality</b>                             | 13.1                                                                                            | 13.4                        | 13.6                         | 19.5                          | 15.3                                                                                             | 18.2           | 21.8           | 28.8           | 15.4        |
| Cancer                                               | 4.2                                                                                             | 6.2                         | 4.2                          | 6.0                           | 3.8                                                                                              | 4.4            | 4.7            | 3.7            | 4.1         |
| Kidney disease                                       | 1.4                                                                                             | 0.6                         | 0.4                          | 1.7                           | 0.8                                                                                              | 2.0            | 2.6            | 3.9            | 0.5         |
| Accident/suicide/homicide                            | 0.0                                                                                             | 0.0                         | 0.6                          | 0.9                           | 0.6                                                                                              | 0.2            | 0.6            | 1.6            | 0.5         |
| Other non-CVD disease                                | 8.0                                                                                             | 7.1                         | 8.8                          | 12.0                          | 10.7                                                                                             | 12.5           | 15.4           | 21.8           | 10.9        |
| <b>Combined fatal and non-fatal</b>                  |                                                                                                 |                             |                              |                               |                                                                                                  |                |                |                |             |
| <b>Hospitalized events:</b>                          |                                                                                                 |                             |                              |                               |                                                                                                  |                |                |                |             |
| CVD                                                  | 29.7                                                                                            | 24.7                        | 29.4                         | 38.4                          | 29.1                                                                                             | 32.3           | 42.0           | 55.3           | 24.4        |
| CHD                                                  | 12.0                                                                                            | 7.4                         | 9.8                          | 12.1                          | 10.3                                                                                             | 10.9           | 16.5           | 23.0           | 8.1         |
| Heart failure                                        | 18.8                                                                                            | 18.0                        | 24.1                         | 34.2                          | 23.4                                                                                             | 27.0           | 37.6           | 51.0           | 18.8        |
| Stroke                                               | 8.0                                                                                             | 10.1                        | 9.6                          | 11.3                          | 8.4                                                                                              | 10.6           | 11.3           | 17.1           | 7.1         |
| Cancer                                               | 13.1                                                                                            | 11.0                        | 7.9                          | 12.0                          | 8.4                                                                                              | 11.6           | 12.0           | 12.3           | 7.4         |

|                                                  |                        |                                     |                                      |                                              |                          |                           |                           |                            |             |
|--------------------------------------------------|------------------------|-------------------------------------|--------------------------------------|----------------------------------------------|--------------------------|---------------------------|---------------------------|----------------------------|-------------|
| Kidney disease/ESRD                              | 2.7                    | 0.9                                 | 1.6                                  | 5.5                                          | 2.4                      | 5.6                       | 6.5                       | 13.0                       | 4.4         |
| <b>Calcium channel blocker (CCB)</b>             |                        |                                     |                                      |                                              |                          |                           |                           |                            |             |
| [Randomized to Amlodipine in trial: 2189 (27.3)] | 1) any CCB<br>(1 drug) | 2) any CCB plus 1 drug<br>(2 drugs) | 3) any CCB plus 2 drugs<br>(3 drugs) | 4) any CCB plus $\geq 3$ drugs<br>(4+ drugs) | 1) no CCB<br>(on 1 drug) | 2) no CCB<br>(on 2 drugs) | 3) no CCB<br>(on 3 drugs) | 4) no CCB<br>(on 4+ drugs) | 5) No Drugs |
| <b>Mortality Outcomes:</b>                       |                        |                                     |                                      |                                              |                          |                           |                           |                            |             |
| <b>All-cause mortality</b>                       | 24.7                   | 21.1                                | 29.5                                 | 35.0                                         | 23.9                     | 24.0                      | 33.7                      | 39.3                       | 23.9        |
| <b>CVD mortality</b>                             | 12.5                   | 6.3                                 | 15.0                                 | 15.3                                         | 9.3                      | 10.2                      | 17.7                      | 23.9                       | 11.2        |
| CHD mortality                                    | 4.6                    | 2.5                                 | 4.8                                  | 7.4                                          | 3.9                      | 4.7                       | 7.1                       | 11.8                       | 5.0         |
| Stroke mortality                                 | 0.0                    | 0.5                                 | 2.5                                  | 2.1                                          | 1.6                      | 1.6                       | 2.2                       | 2.5                        | 2.5         |
| Heart failure mortality                          | 0.0                    | 0.5                                 | 3.3                                  | 2.2                                          | 0.4                      | 0.6                       | 2.2                       | 7.4                        | 1.8         |
| Other CVD mortality                              | 8.3                    | 2.9                                 | 5.2                                  | 4.5                                          | 3.6                      | 3.5                       | 7.3                       | 4.5                        | 2.4         |
| <b>Non-CVD Mortality</b>                         | 13.9                   | 15.7                                | 17.1                                 | 23.3                                         | 16.1                     | 15.1                      | 19.5                      | 20.2                       | 14.3        |
| Cancer                                           | 4.9                    | 5.7                                 | 5.3                                  | 5.1                                          | 5.3                      | 4.8                       | 5.8                       | 5.6                        | 5.1         |
| Kidney disease                                   | 1.2                    | 1.5                                 | 1.0                                  | 1.8                                          | 0.5                      | 0.6                       | 2.9                       | 2.2                        | 0.9         |
| Accident/suicide/homicide                        | 0.0                    | 0.0                                 | 0.0                                  | 0.3                                          | 1.4                      | 0.3                       | 0.6                       | 0.0                        | 0.0         |
| Other non-CVD disease                            | 8.4                    | 9.3                                 | 11.6                                 | 17.5                                         | 9.6                      | 10.0                      | 11.5                      | 13.6                       | 8.8         |
| <b>Combined fatal and non-fatal</b>              |                        |                                     |                                      |                                              |                          |                           |                           |                            |             |
| <b>Hospitalized events:</b>                      |                        |                                     |                                      |                                              |                          |                           |                           |                            |             |
| CVD                                              | 25.1                   | 26.0                                | 36.0                                 | 41.6                                         | 26.5                     | 28.5                      | 39.0                      | 44.0                       | 24.3        |
| CHD                                              | 9.3                    | 9.2                                 | 14.5                                 | 14.9                                         | 7.2                      | 9.7                       | 13.3                      | 15.4                       | 9.5         |
| Heart failure                                    | 21.2                   | 19.7                                | 30.5                                 | 36.3                                         | 20.0                     | 24.3                      | 34.9                      | 43.1                       | 19.2        |
| Stroke                                           | 5.6                    | 8.9                                 | 12.0                                 | 12.5                                         | 9.5                      | 11.5                      | 9.0                       | 13.0                       | 7.2         |
| Cancer                                           | 9.3                    | 9.6                                 | 9.6                                  | 11.8                                         | 11.4                     | 10.9                      | 9.4                       | 13.8                       | 9.8         |
| Kidney disease/ESRD                              | 4.7                    | 2.5                                 | 5.4                                  | 8.9                                          | 4.0                      | 2.9                       | 4.3                       | 6.8                        | 4.0         |

| <b>Angiotensin-converting enzyme (ACE) inhibitor/ Angiotensin II receptor blockers (ARB)</b> | 1) any ACE/ARB | 2) any ACE/ARB plus 1 drug | 3) any ACE/ARB plus 2 drugs | 4) any ACE/ARB plus ≥3 drugs | 1) no ACE/ARB (on 1 drug) | 2) no ACE/ARB (on 2 drugs) | 3) no ACE/ARB (on 3 drugs) | 4) no ACE/ARB (on 4+ drugs) | 5) No Drugs |
|----------------------------------------------------------------------------------------------|----------------|----------------------------|-----------------------------|------------------------------|---------------------------|----------------------------|----------------------------|-----------------------------|-------------|
| [Randomized to Lisinopril in trial: 2181 (27.2)]                                             | (1 drug)       | (2 drugs)                  | (3 drugs)                   | (4+ drugs)                   | (on 1 drug)               | (on 2 drugs)               | (on 3 drugs)               | (on 4+ drugs)               |             |
| <b>Mortality Outcomes:</b>                                                                   |                |                            |                             |                              |                           |                            |                            |                             |             |
| <b>All-cause mortality</b>                                                                   | 21.4           | 22.0                       | 30.4                        | 35.0                         | 27.4                      | 33.7                       | 32.5                       | 34.1                        | 21.0        |
| <b>CVD mortality</b>                                                                         | 13.4           | 8.6                        | 14.9                        | 18.7                         | 14.3                      | 17.8                       | 14.4                       | 13.9                        | 6.5         |
| CHD mortality                                                                                | 7.1            | 4.3                        | 6.3                         | 8.9                          | 8.0                       | 5.8                        | 8.7                        | 2.8                         | 2.8         |
| Stroke mortality                                                                             | 1.8            | 1.2                        | 1.6                         | 2.4                          | 1.8                       | 5.5                        | 1.1                        | 0.0                         | 0.8         |
| Heart failure mortality                                                                      | 1.8            | 1.2                        | 3.1                         | 2.8                          | 1.2                       | 3.1                        | 1.0                        | 3.3                         | 0.0         |
| Other CVD mortality                                                                          | 3.4            | 2.1                        | 4.7                         | 5.9                          | 4.0                       | 4.6                        | 4.2                        | 8.4                         | 2.9         |
| <b>Non-CVD Mortality</b>                                                                     | 9.3            | 14.7                       | 18.2                        | 20.1                         | 15.2                      | 19.4                       | 21.2                       | 23.5                        | 15.5        |
| Cancer                                                                                       | 4.2            | 3.5                        | 5.2                         | 5.8                          | 5.0                       | 4.7                        | 4.8                        | 8.2                         | 9.8         |
| Kidney disease                                                                               | 1.0            | 0.9                        | 0.6                         | 1.8                          | 3.0                       | 2.4                        | 2.0                        | 3.1                         | 0.9         |
| Accident/suicide/homicide                                                                    | 0.0            | 0.9                        | 0.9                         | 0.5                          | 0.7                       | 2.2                        | 0.0                        | 2.9                         | 0.0         |
| Other non-CVD disease                                                                        | 4.4            | 10.0                       | 12.4                        | 13.3                         | 7.4                       | 11.4                       | 15.5                       | 11.5                        | 5.6         |
| <b>Combined fatal and non-fatal</b>                                                          |                |                            |                             |                              |                           |                            |                            |                             |             |
| <b>Hospitalized events:</b>                                                                  |                |                            |                             |                              |                           |                            |                            |                             |             |
| CVD                                                                                          | 25.7           | 27.9                       | 36.3                        | 43.0                         | 28.0                      | 37.3                       | 33.3                       | 30.7                        | 17.5        |
| CHD                                                                                          | 11.9           | 9.2                        | 14.2                        | 15.9                         | 9.9                       | 12.7                       | 14.6                       | 8.4                         | 3.7         |
| Heart failure                                                                                | 17.2           | 22.4                       | 33.2                        | 39.1                         | 20.7                      | 31.9                       | 27.8                       | 28.2                        | 13.5        |
| Stroke                                                                                       | 9.3            | 10.2                       | 11.5                        | 12.3                         | 12.1                      | 14.6                       | 8.5                        | 11.4                        | 9.1         |
| Cancer                                                                                       | 9.2            | 7.6                        | 11.4                        | 12.5                         | 10.2                      | 11.4                       | 9.7                        | 10.4                        | 11.4        |
| Kidney disease/ESRD                                                                          | 1.0            | 2.8                        | 3.2                         | 7.8                          | 5.8                       | 6.1                        | 6.0                        | 13.2                        | 4.5         |

**Table S6. Morbidity/mortality outcomes between 2007 and 2017 by the pattern of antihypertensive drug use**

| Total Participants: N=8007                                                                      | N (%) of having morbidity/mortality outcomes in participants who received the study class drug |                                          |                                           |                                             | N (%) of having morbidity/mortality outcomes in participants who did not receive the study trial drug |                                |                                |                                 |             |
|-------------------------------------------------------------------------------------------------|------------------------------------------------------------------------------------------------|------------------------------------------|-------------------------------------------|---------------------------------------------|-------------------------------------------------------------------------------------------------------|--------------------------------|--------------------------------|---------------------------------|-------------|
|                                                                                                 | 1) any diuretic<br>(1 drug)                                                                    | 2) any diuretic plus 1 drug<br>(2 drugs) | 3) any diuretic plus 2 drugs<br>(3 drugs) | 4) any diuretic plus ≥3 drugs<br>(4+ drugs) | 1) no diuretic<br>(on 1 drug)                                                                         | 2) no diuretic<br>(on 2 drugs) | 3) no diuretic<br>(on 3 drugs) | 4) no diuretic<br>(on 4+ drugs) | 5) No Drugs |
| <b>Diuretic= Thiazide/thiazide-type</b><br>[Randomized to Chlorthalidone in trial: 3637 (45.4)] |                                                                                                |                                          |                                           |                                             |                                                                                                       |                                |                                |                                 |             |
| <b>Mortality Outcomes:</b>                                                                      |                                                                                                |                                          |                                           |                                             |                                                                                                       |                                |                                |                                 |             |
| <b>All-cause mortality</b>                                                                      | 46 (56.1)                                                                                      | 214 (58.5)                               | 303 (56.2)                                | 409 (65.3)                                  | 285 (68.7)                                                                                            | 391 (69.6)                     | 350 (76.3)                     | 308 (83)                        | 157 (72.4)  |
| <b>CVD mortality</b>                                                                            | 18 (22)                                                                                        | 94 (25.7)                                | 107 (19.9)                                | 170 (27.2)                                  | 97 (23.4)                                                                                             | 159 (28.3)                     | 160 (34.9)                     | 147 (39.6)                      | 61 (28.1)   |
| CHD mortality                                                                                   | 8 (9.8)                                                                                        | 36 (9.8)                                 | 42 (7.8)                                  | 87 (13.9)                                   | 41 (9.9)                                                                                              | 60 (10.7)                      | 78 (17)                        | 68 (18.3)                       | 26 (12)     |
| Stroke mortality                                                                                | 3 (3.7)                                                                                        | 15 (4.1)                                 | 18 (3.3)                                  | 21 (3.4)                                    | 17 (4.1)                                                                                              | 24 (4.3)                       | 18 (3.9)                       | 18 (4.9)                        | 11 (5.1)    |
| Heart failure mortality                                                                         | 3 (3.7)                                                                                        | 6 (1.6)                                  | 10 (1.9)                                  | 16 (2.6)                                    | 6 (1.4)                                                                                               | 13 (2.3)                       | 18 (3.9)                       | 17 (4.6)                        | 5 (2.3)     |
| Other CVD mortality                                                                             | 4 (4.9)                                                                                        | 37 (10.1)                                | 37 (6.9)                                  | 46 (7.3)                                    | 33 (8)                                                                                                | 62 (11)                        | 46 (10)                        | 44 (11.9)                       | 19 (8.8)    |
| <b>Non-CVD Mortality</b>                                                                        | 27 (32.9)                                                                                      | 120 (32.8)                               | 194 (36)                                  | 237 (37.9)                                  | 186 (44.8)                                                                                            | 229 (40.7)                     | 190 (41.4)                     | 161 (43.4)                      | 94 (43.3)   |
| Cancer                                                                                          | 6 (7.3)                                                                                        | 37 (10.1)                                | 50 (9.3)                                  | 54 (8.6)                                    | 37 (8.9)                                                                                              | 52 (9.3)                       | 43 (9.4)                       | 25 (6.7)                        | 20 (9.2)    |
| Kidney disease                                                                                  | 1 (1.2)                                                                                        | 6 (1.6)                                  | 7 (1.3)                                   | 17 (2.7)                                    | 7 (1.7)                                                                                               | 15 (2.7)                       | 13 (2.8)                       | 17 (4.6)                        | 1 (0.5)     |
| Accident/suicide/homicide                                                                       | 1 (1.2)                                                                                        | 3 (0.8)                                  | 7 (1.3)                                   | 8 (1.3)                                     | 10 (2.4)                                                                                              | 5 (0.9)                        | 5 (1.1)                        | 8 (2.2)                         | 3 (1.4)     |
| Other non-CVD disease                                                                           | 19 (23.2)                                                                                      | 74 (20.2)                                | 130 (24.1)                                | 158 (25.2)                                  | 132 (31.8)                                                                                            | 157 (27.9)                     | 129 (28.1)                     | 111 (29.9)                      | 70 (32.3)   |
| <b>Unknown causes of mortality</b>                                                              | 1 (1.2)                                                                                        | 0 (0)                                    | 2 (0.4)                                   | 2 (0.3)                                     | 2 (0.5)                                                                                               | 3 (0.5)                        | 0 (0)                          | 0 (0)                           | 2 (0.9)     |
| <b>Combined fatal and non-fatal</b>                                                             |                                                                                                |                                          |                                           |                                             |                                                                                                       |                                |                                |                                 |             |

**Hospitalized events:\***

|                     |           |            |            |            |            |            |            |            |           |
|---------------------|-----------|------------|------------|------------|------------|------------|------------|------------|-----------|
| CHD                 | 12 (14.6) | 48 (13.1)  | 72 (13.4)  | 123 (19.6) | 66 (15.9)  | 88 (15.7)  | 107 (23.3) | 100 (27)   | 33 (15.2) |
| CVD                 | 29 (35.4) | 113 (30.9) | 181 (33.6) | 294 (47)   | 146 (35.2) | 214 (38.1) | 231 (50.3) | 230 (62)   | 69 (31.8) |
| Heart failure       | 18 (22)   | 67 (18.3)  | 130 (24.1) | 218 (34.8) | 98 (23.6)  | 154 (27.4) | 177 (38.6) | 196 (52.8) | 45 (20.7) |
| Stroke              | 8 (9.8)   | 43 (11.7)  | 58 (10.8)  | 75 (12)    | 41 (9.9)   | 68 (12.1)  | 53 (11.5)  | 59 (15.9)  | 21 (9.7)  |
| Cancer              | 14 (17.1) | 55 (15)    | 72 (13.4)  | 92 (14.7)  | 55 (13.3)  | 86 (15.3)  | 72 (15.7)  | 52 (14)    | 27 (12.4) |
| Kidney disease/ESRD | 2 (2.4)   | 7 (1.9)    | 14 (2.6)   | 39 (6.2)   | 13 (3.1)   | 34 (6)     | 28 (6.1)   | 46 (12.4)  | 9 (4.1)   |

| <b>Calcium channel blocker (CCB)</b><br>[Randomized to Amlodipine in trial: 2189 (27.3)] | 1) any CCB | 2) any CCB plus 1 drug | 3) any CCB plus 2 drugs | 4) any CCB plus ≥3 drugs | 1) no CCB (on 1 drug) | 2) no CCB (on 2 drugs) | 3) no CCB (on 3 drugs) | 4) no CCB (on 4+ drugs) | 5) No Drugs |
|------------------------------------------------------------------------------------------|------------|------------------------|-------------------------|--------------------------|-----------------------|------------------------|------------------------|-------------------------|-------------|
|                                                                                          | (1 drug)   | (2 drugs)              | (3 drugs)               | (4+ drugs)               |                       |                        |                        |                         |             |

**Mortality Outcomes:**

|                            |           |            |            |            |            |            |            |           |           |
|----------------------------|-----------|------------|------------|------------|------------|------------|------------|-----------|-----------|
| <b>All-cause mortality</b> | 63 (67.7) | 144 (64.6) | 202 (62.7) | 323 (68.6) | 158 (69.9) | 226 (64.6) | 181 (70.2) | 89 (79.5) | 97 (72.4) |
| CV mortality               | 25 (26.9) | 46 (20.6)  | 97 (30.1)  | 123 (26.1) | 62 (27.4)  | 81 (23.1)  | 82 (31.8)  | 41 (36.6) | 35 (26.1) |
| CHD mortality              | 7 (7.5)   | 17 (7.6)   | 42 (13)    | 56 (11.9)  | 30 (13.3)  | 33 (9.4)   | 31 (12)    | 18 (16.1) | 16 (11.9) |
| Stroke mortality           | 1 (1.1)   | 5 (2.2)    | 14 (4.3)   | 15 (3.2)   | 8 (3.5)    | 15 (4.3)   | 11 (4.3)   | 2 (1.8)   | 6 (4.5)   |
| Heart failure mortality    | 1 (1.1)   | 3 (1.3)    | 14 (4.3)   | 19 (4)     | 6 (2.7)    | 6 (1.7)    | 12 (4.7)   | 12 (10.7) | 3 (2.2)   |
| Other CVD mortality        | 16 (17.2) | 21 (9.4)   | 27 (8.4)   | 33 (7)     | 18 (8)     | 27 (7.7)   | 28 (10.9)  | 9 (8)     | 10 (7.5)  |
| <b>Non-CV Mortality</b>    | 38 (40.9) | 98 (43.9)  | 105 (32.6) | 199 (42.3) | 96 (42.5)  | 143 (40.9) | 98 (38)    | 48 (42.9) | 62 (46.3) |
| Cancer                     | 10 (10.8) | 26 (11.7)  | 26 (8.1)   | 39 (8.3)   | 19 (8.4)   | 33 (9.4)   | 20 (7.8)   | 12 (10.7) | 13 (9.7)  |
| Kidney disease             | 4 (4.3)   | 5 (2.2)    | 5 (1.6)    | 14 (3)     | 5 (2.2)    | 7 (2)      | 7 (2.7)    | 4 (3.6)   | 1 (0.7)   |
| Accident/suicide/homicide  | 3 (3.2)   | 3 (1.3)    | 2 (0.6)    | 4 (0.8)    | 4 (1.8)    | 3 (0.9)    | 2 (0.8)    | 0 (0)     | 1 (0.7)   |



|                                                                                              |                |                            |                             |                              |                           |                            |                            |                             |             |
|----------------------------------------------------------------------------------------------|----------------|----------------------------|-----------------------------|------------------------------|---------------------------|----------------------------|----------------------------|-----------------------------|-------------|
| Other non-CVD disease                                                                        | 21 (22.6)      | 64 (28.7)                  | 72 (22.4)                   | 142 (30.1)                   | 68 (30.1)                 | 100 (28.6)                 | 69 (26.7)                  | 32 (28.6)                   | 47 (35.1)   |
| <b>Unknown causes of mortality</b>                                                           | 0 (0)          | 0 (0)                      | 0 (0)                       | 1 (0.2)                      | 0 (0)                     | 2 (0.6)                    | 1 (0.4)                    | 0 (0)                       | 0 (0)       |
| <b>Combined fatal and non-fatal</b>                                                          |                |                            |                             |                              |                           |                            |                            |                             |             |
| <b>Hospitalized events:</b>                                                                  |                |                            |                             |                              |                           |                            |                            |                             |             |
| CHD                                                                                          | 11 (11.8)      | 31 (13.9)                  | 71 (22)                     | 90 (19.1)                    | 37 (16.4)                 | 49 (14)                    | 46 (17.8)                  | 22 (19.6)                   | 23 (17.2)   |
| CVD                                                                                          | 26 (28)        | 69 (30.9)                  | 143 (44.4)                  | 224 (47.6)                   | 82 (36.3)                 | 116 (33.1)                 | 115 (44.6)                 | 55 (49.1)                   | 44 (32.8)   |
| Heart failure                                                                                | 20 (21.5)      | 44 (19.7)                  | 101 (31.4)                  | 182 (38.6)                   | 49 (21.7)                 | 87 (24.9)                  | 97 (37.6)                  | 53 (47.3)                   | 27 (20.1)   |
| Stroke                                                                                       | 7 (7.5)        | 24 (10.8)                  | 42 (13)                     | 58 (12.3)                    | 25 (11.1)                 | 47 (13.4)                  | 27 (10.5)                  | 12 (10.7)                   | 12 (9)      |
| Cancer                                                                                       | 14 (15.1)      | 34 (15.2)                  | 40 (12.4)                   | 69 (14.6)                    | 32 (14.2)                 | 54 (15.4)                  | 29 (11.2)                  | 21 (18.8)                   | 19 (14.2)   |
| Kidney disease/ESRD                                                                          | 7 (7.5)        | 7 (3.1)                    | 18 (5.6)                    | 44 (9.3)                     | 12 (5.3)                  | 15 (4.3)                   | 10 (3.9)                   | 8 (7.1)                     | 6 (4.5)     |
| <hr/>                                                                                        |                |                            |                             |                              |                           |                            |                            |                             |             |
| <b>Angiotensin-converting enzyme (ACE) inhibitor/ Angiotensin II receptor blockers (ARB)</b> | 1) any ACE/ARB | 2) any ACE/ARB plus 1 drug | 3) any ACE/ARB plus 2 drugs | 4) any ACE/ARB plus ≥3 drugs | 1) no ACE/ARB (on 1 drug) | 2) no ACE/ARB (on 2 drugs) | 3) no ACE/ARB (on 3 drugs) | 4) no ACE/ARB (on 4+ drugs) | 5) No Drugs |
| [Randomized to Lisinopril in trial: 2181 (27.2)]                                             | (1 drug)       | (2 drugs)                  | (3 drugs)                   | (4+ drugs)                   | (on 1 drug)               | (on 2 drugs)               | (on 3 drugs)               | (on 4+ drugs)               |             |
| <hr/>                                                                                        |                |                            |                             |                              |                           |                            |                            |                             |             |
| <b>Mortality Outcomes:</b>                                                                   |                |                            |                             |                              |                           |                            |                            |                             |             |
| <b>All-cause mortality</b>                                                                   | 82 (65.1)      | 225 (58.9)                 | 355 (67.5)                  | 370 (70.1)                   | 125 (69.8)                | 117 (71.8)                 | 85 (72.6)                  | 30 (73.2)                   | 85 (71.4)   |
| CV mortality                                                                                 | 27 (21.4)      | 77 (20.2)                  | 140 (26.6)                  | 189 (35.8)                   | 50 (27.9)                 | 55 (33.7)                  | 33 (28.2)                  | 10 (24.4)                   | 27 (22.7)   |
| CHD mortality                                                                                | 13 (10.3)      | 29 (7.6)                   | 63 (12)                     | 78 (14.8)                    | 22 (12.3)                 | 23 (14.1)                  | 21 (17.9)                  | 5 (12.2)                    | 9 (7.6)     |
| Stroke mortality                                                                             | 5 (4)          | 14 (3.7)                   | 15 (2.9)                    | 27 (5.1)                     | 10 (5.6)                  | 12 (7.4)                   | 1 (0.9)                    | 0 (0)                       | 3 (2.5)     |
| Heart failure mortality                                                                      | 2 (1.6)        | 7 (1.8)                    | 18 (3.4)                    | 25 (4.7)                     | 2 (1.1)                   | 8 (4.9)                    | 1 (0.9)                    | 1 (2.4)                     | 3 (2.5)     |
| Other CVD mortality                                                                          | 7 (5.6)        | 27 (7.1)                   | 44 (8.4)                    | 59 (11.2)                    | 16 (8.9)                  | 12 (7.4)                   | 10 (8.5)                   | 4 (9.8)                     | 12 (10.1)   |

|                                     |           |            |            |           |           |           |           |           |           |
|-------------------------------------|-----------|------------|------------|-----------|-----------|-----------|-----------|-----------|-----------|
| <b>Non-CV Mortality</b>             |           |            |            | 178       |           |           |           |           |           |
|                                     | 55 (43.7) | 146 (38.2) | 214 (40.7) | (33.7)    | 75 (41.9) | 62 (38)   | 52 (44.4) | 20 (48.8) | 58 (48.7) |
| Cancer                              | 14 (11.1) | 30 (7.9)   | 56 (10.6)  | 36 (6.8)  | 22 (12.3) | 14 (8.6)  | 11 (9.4)  | 6 (14.6)  | 25 (21)   |
| Kidney disease                      | 2 (1.6)   | 8 (2.1)    | 12 (2.3)   | 19 (3.6)  | 10 (5.6)  | 7 (4.3)   | 3 (2.6)   | 2 (4.9)   | 4 (3.4)   |
| Accident/suicide/homicide           | 2 (1.6)   | 8 (2.1)    | 7 (1.3)    | 5 (0.9)   | 3 (1.7)   | 4 (2.5)   | 1 (0.9)   | 2 (4.9)   | 0 (0)     |
| Other non-CVD disease               |           |            |            | 118       |           |           |           |           |           |
|                                     | 37 (29.4) | 100 (26.2) | 139 (26.4) | (22.3)    | 40 (22.3) | 37 (22.7) | 37 (31.6) | 10 (24.4) | 29 (24.4) |
| <b>Unknown causes of mortality</b>  | 0 (0)     | 2 (0.5)    | 1 (0.2)    | 3 (0.6)   | 0 (0)     | 0 (0)     | 0 (0)     | 0 (0)     | 0 (0)     |
| <b>Combined fatal and non-fatal</b> |           |            |            |           |           |           |           |           |           |
| <b>Hospitalized events:</b>         |           |            |            |           |           |           |           |           |           |
| CHD                                 |           |            |            | 114       |           |           |           |           |           |
|                                     | 21 (16.7) | 49 (12.8)  | 99 (18.8)  | (21.6)    | 25 (14)   | 33 (20.2) | 27 (23.1) | 7 (17.1)  | 11 (9.2)  |
| CVD                                 |           |            |            | 262       |           |           |           |           |           |
|                                     | 38 (30.2) | 122 (31.9) | 223 (42.4) | (49.6)    | 59 (33)   | 74 (45.4) | 50 (42.7) | 16 (39)   | 28 (23.5) |
| Heart failure                       |           |            |            | 215       |           |           |           |           |           |
|                                     | 21 (16.7) | 89 (23.3)  | 175 (33.3) | (40.7)    | 36 (20.1) | 55 (33.7) | 32 (27.4) | 11 (26.8) | 19 (16)   |
| Stroke                              | 15 (11.9) | 46 (12)    | 64 (12.2)  | 73 (13.8) | 27 (15.1) | 25 (15.3) | 9 (7.7)   | 4 (9.8)   | 13 (10.9) |
| Cancer                              | 20 (15.9) | 45 (11.8)  | 84 (16)    | 68 (12.9) | 29 (16.2) | 24 (14.7) | 16 (13.7) | 7 (17.1)  | 27 (22.7) |
| Kidney disease/ESRD                 | 2 (1.6)   | 15 (3.9)   | 24 (4.6)   | 48 (9.1)  | 15 (8.4)  | 13 (8)    | 7 (6)     | 6 (14.6)  | 8 (6.7)   |

\*For morbidity, patients may have more than one category of events.

**Table S7a. Adjusted hazard ratio (95% CI) of morbidity and mortality by the end of post-trial (12-31-2017) period by 3 arms**

| Total Participants: N=8007                           | In trial participants who received the study trial drug | In trial participants who did not receive the study trial drug |
|------------------------------------------------------|---------------------------------------------------------|----------------------------------------------------------------|
| <b>Diuretic= Thiazide/thiazide-type</b>              |                                                         |                                                                |
| [Randomized to Chlorthalidone in trial: 3637 (45.4)] | 1) any diuretic                                         | 1) no diuretic                                                 |
| <b>Mortality Outcomes:</b>                           |                                                         |                                                                |
| <b>All-cause mortality</b>                           | 1.00 (ref)                                              | 1.24 (1.13-1.35)                                               |
| <b>CVD mortality</b>                                 | 1.00 (ref)                                              | 1.31 (1.14-1.51)                                               |
| CHD mortality                                        | 1.00 (ref)                                              | 1.30 (1.05-1.60)                                               |
| Stroke mortality                                     | 1.00 (ref)                                              | 1.27 (0.87-1.84)                                               |
| Heart failure mortality                              | 1.00 (ref)                                              | 1.11 (0.70-1.76)                                               |
| Other CVD mortality                                  | 1.00 (ref)                                              | 1.42 (1.11-1.81)                                               |
| <b>Non-CVD Mortality</b>                             | 1.00 (ref)                                              | 1.18 (1.05-1.33)                                               |
| Cancer                                               | 1.00 (ref)                                              | 1.04 (0.81-1.33)                                               |
| Kidney disease                                       | 1.00 (ref)                                              | 1.34 (0.82-2.20)                                               |
| Accident/suicide/homicide                            | 1.00 (ref)                                              | 1.40 (0.76-2.57)                                               |
| Other non-CVD disease                                | 1.00 (ref)                                              | 1.20 (1.05-1.39)                                               |
| <b>Combined fatal and non-fatal</b>                  |                                                         |                                                                |
| <b>Hospitalized events:</b>                          |                                                         |                                                                |
| CVD                                                  | 1.00 (ref)                                              | 1.23 (1.09-1.37)                                               |
| CHD                                                  | 1.00 (ref)                                              | 1.25 (1.05-1.49)                                               |
| Heart failure                                        | 1.00 (ref)                                              | 1.31 (1.14-1.49)                                               |
| Stroke                                               | 1.00 (ref)                                              | 1.20 (0.97-1.49)                                               |
| Cancer                                               | 1.00 (ref)                                              | 1.05 (0.87-1.27)                                               |

|                                                  |            |                  |
|--------------------------------------------------|------------|------------------|
| Kidney disease/ESRD                              | 1.00 (ref) | 1.57 (1.12-2.19) |
| <b>Calcium channel blocker (CCB)</b>             |            |                  |
| [Randomized to Amlodipine in trial: 2189 (27.3)] | 1) any CCB | 1) no CCB        |
| <b>Mortality Outcomes:</b>                       |            |                  |
| <b>All-cause mortality</b>                       | 1.00 (ref) | 1.01 (0.90-1.14) |
| <b>CVD mortality</b>                             | 1.00 (ref) | 1.05 (0.87-1.25) |
| CHD mortality                                    | 1.00 (ref) | 1.09 (0.82-1.43) |
| Stroke mortality                                 | 1.00 (ref) | 1.26 (0.76-2.09) |
| Heart failure mortality                          | 1.00 (ref) | 1.03 (0.63-1.66) |
| Other CVD mortality                              | 1.00 (ref) | 0.92 (0.67-1.28) |
| <b>Non-CVD Mortality</b>                         | 1.00 (ref) | 0.99 (0.85-1.15) |
| Cancer                                           | 1.00 (ref) | 0.95 (0.69-1.31) |
| Kidney disease                                   | 1.00 (ref) | 1.08 (0.60-1.95) |
| Accident/suicide/homicide                        | 1.00 (ref) | 0.61 (0.23-1.60) |
| Other non-CVD disease                            | 1.00 (ref) | 1.01 (0.85-1.21) |
| <b>Combined fatal and non-fatal</b>              |            |                  |
| <b>Hospitalized events:</b>                      |            |                  |
| CVD                                              | 1.00 (ref) | 0.91 (0.78-1.05) |
| CHD                                              | 1.00 (ref) | 0.88 (0.70-1.11) |
| Heart failure                                    | 1.00 (ref) | 0.92 (0.77-1.09) |
| Stroke                                           | 1.00 (ref) | 1.03 (0.78-1.35) |
| Cancer                                           | 1.00 (ref) | 0.96 (0.75-1.24) |
| Kidney disease/ESRD                              | 1.00 (ref) | 0.91 (0.62-1.35) |

**Angiotensin-converting enzyme (ACE)  
inhibitor / Angiotensin II receptor  
blockers (ARB)**

[Randomized to Lisinopril in trial: 2181 (27.2)]

1) any ACE/ARB

1) no ACE/ARB

**Mortality Outcomes:**

|                                     |            |                  |
|-------------------------------------|------------|------------------|
| <b>All-cause mortality</b>          | 1.00 (ref) | 1.02 (0.90-1.16) |
| <b>CVD mortality</b>                | 1.00 (ref) | 0.96 (0.79-1.16) |
| CHD mortality                       | 1.00 (ref) | 1.02 (0.76-1.35) |
| Stroke mortality                    | 1.00 (ref) | 0.95 (0.57-1.60) |
| Heart failure mortality             | 1.00 (ref) | 0.81 (0.44-1.50) |
| Other CVD mortality                 | 1.00 (ref) | 0.92 (0.65-1.32) |
| <b>Non-CVD Mortality</b>            | 1.00 (ref) | 1.08 (0.92-1.27) |
| Cancer                              | 1.00 (ref) | 1.19 (0.86-1.65) |
| Kidney disease                      | 1.00 (ref) | 1.88 (1.07-3.31) |
| Accident/suicide/homicide           | 1.00 (ref) | 1.15 (0.54-2.46) |
| Other non-CVD disease               | 1.00 (ref) | 0.96 (0.78-1.18) |
| <b>Combined fatal and non-fatal</b> |            |                  |
| <b>Hospitalized events:</b>         |            |                  |
| CVD                                 | 1.00 (ref) | 0.85 (0.72-1.01) |
| CHD                                 | 1.00 (ref) | 0.88 (0.69-1.13) |
| Heart failure                       | 1.00 (ref) | 0.75 (0.62-0.92) |
| Stroke                              | 1.00 (ref) | 0.90 (0.66-1.21) |
| Cancer                              | 1.00 (ref) | 1.11 (0.85-1.45) |
| Kidney disease/ESRD                 | 1.00 (ref) | 1.66 (1.12-2.44) |

\*hazard did not converge.

Baseline covariates in the adjusted hazard ratio models include: age (yrs), race (Black/Non-Black), gender, education (yrs), current smoking status, BMI, entry criterion HDL<35, LDL, GFR, history of diabetes, antihypertensive treatment, on pravastatin, SBP; In-trial covariate included: final SBP.

**Table S7b. Adjusted hazard ratio (95% CI) of morbidity and mortality by the end of post-trial (12-31-2017) period by post-trial drug uses**

| <b>Total Participants: N=8007</b>   | <b>1) Diuretic only<br/>(N=463 [5.8%])</b> | <b>2) CCB only<br/>(N=685 [8.6%])</b> | <b>3) ACE/ARB only<br/>(N=1,444<br/>[18.0%])</b> | <b>4) 2 or 3 of Diuretic,<br/>CCB, or ACE/ARB<br/>(N=4,311 [53.8%])</b> | <b>5) No Drugs<br/>(N=1,104 [13.8%])</b> |
|-------------------------------------|--------------------------------------------|---------------------------------------|--------------------------------------------------|-------------------------------------------------------------------------|------------------------------------------|
| <b>Mortality Outcomes:</b>          |                                            |                                       |                                                  |                                                                         |                                          |
| <b>All-cause mortality</b>          | 1.00 (ref)                                 | 1.20 (1.03-1.41)                      | 1.27 (1.10-1.46)                                 | 1.06 (0.93-1.21)                                                        | 1.22 (1.06-1.42)                         |
| <b>CVD mortality</b>                | 1.00 (ref)                                 | 1.16 (0.91-1.49)                      | 1.30 (1.04-1.62)                                 | 1.05 (0.86-1.29)                                                        | 1.17 (0.94-1.47)                         |
| CHD mortality                       | 1.00 (ref)                                 | 1.36 (0.92-2.01)                      | 1.41 (0.99-2.01)                                 | 1.24 (0.90-1.72)                                                        | 1.46 (1.02-2.09)                         |
| Stroke mortality                    | 1.00 (ref)                                 | 0.93 (0.48-1.80)                      | 1.14 (0.64-2.03)                                 | 0.93 (0.56-1.55)                                                        | 1.03 (0.57-1.87)                         |
| Heart failure mortality             | 1.00 (ref)                                 | 0.60 (0.27-1.30)                      | 0.88 (0.47-1.64)                                 | 0.92 (0.53-1.59)                                                        | 0.84 (0.44-1.59)                         |
| Other CVD mortality                 | 1.00 (ref)                                 | 1.27 (0.83-1.94)                      | 1.40 (0.96-2.06)                                 | 0.95 (0.67-1.35)                                                        | 1.06 (0.71-1.59)                         |
| <b>Non-CVD Mortality</b>            | 1.00 (ref)                                 | 1.22 (0.99-1.50)                      | 1.24 (1.02-1.49)                                 | 1.06 (0.89-1.26)                                                        | 1.25 (1.03-1.52)                         |
| Cancer                              | 1.00 (ref)                                 | 1.08 (0.70-1.67)                      | 1.22 (0.83-1.78)                                 | 1.01 (0.72-1.43)                                                        | 1.17 (0.79-1.73)                         |
| Kidney disease                      | 1.00 (ref)                                 | 2.81 (1.13-6.95)                      | 1.56 (0.63-3.89)                                 | 1.46 (0.63-3.37)                                                        | 2.05 (0.83-5.09)                         |
| Accident/suicide/homicide           | 1.00 (ref)                                 | 0.87 (0.28-2.66)                      | 1.14 (0.44-2.94)                                 | 0.90 (0.38-2.14)                                                        | 1.30 (0.50-3.38)                         |
| Other non-CVD disease               | 1.00 (ref)                                 | 1.19 (0.92-1.53)                      | 1.23 (0.98-1.55)                                 | 1.06 (0.86-1.31)                                                        | 1.22 (0.97-1.55)                         |
| <b>Combined fatal and non-fatal</b> |                                            |                                       |                                                  |                                                                         |                                          |
| <b>Hospitalized events:</b>         |                                            |                                       |                                                  |                                                                         |                                          |
| CHD                                 | 1.00 (ref)                                 | 1.38 (1.00-1.91)                      | 1.36 (1.02-1.83)                                 | 1.25 (0.95-1.63)                                                        | 1.29 (0.95-1.74)                         |
| CVD                                 | 1.00 (ref)                                 | 1.37 (1.10-1.70)                      | 1.50 (1.23-1.83)                                 | 1.30 (1.09-1.56)                                                        | 1.29 (1.05-1.59)                         |
| Heart failure                       | 1.00 (ref)                                 | 1.54 (1.18-2.00)                      | 1.71 (1.34-2.18)                                 | 1.47 (1.17-1.83)                                                        | 1.39 (1.08-1.79)                         |
| Stroke                              | 1.00 (ref)                                 | 1.15 (0.76-1.72)                      | 1.62 (1.13-2.32)                                 | 1.27 (0.91-1.77)                                                        | 1.30 (0.89-1.90)                         |
| Cancer                              | 1.00 (ref)                                 | 1.03 (0.73-1.44)                      | 1.08 (0.80-1.45)                                 | 0.91 (0.69-1.18)                                                        | 1.06 (0.78-1.43)                         |
| Kidney disease/ESRD                 | 1.00 (ref)                                 | 4.31 (2.11-8.78)                      | 2.26 (1.10-4.64)                                 | 2.15 (1.10-4.21)                                                        | 3.19 (1.56-6.53)                         |

\*incalculable
